# Supplementary material for: Analysis of Bulk RNA Sequencing Data Reveals Novel Transcription Factors Associated With Immune Infiltration Among Multiple Cancers
Source: Front Immunol. 2021 Aug 20;12:644350. doi: 10.3389/fimmu.2021.644350 (PMC8417605; doi:10.3389/fimmu.2021.644350)
Supplement: Supplementary file 2 [file DataSheet_2.xlsx]

## Sheet: Supplemental Table 1
Supplemental Table 1. Information of the 100 RNA-seq data from 50 patients, including 9 cancer types.
Cancer type	Cancer name	Patient No.	Clean reads (mean)	Total uniquely mapped (mean)	Accession
CSCC	cervical squamous-cell carcinoma	6	113841556	98183221 (86.25%)	GSE87410
ESCC	esophageal squamous cell carcinoma	6	119130784	101826511 (85.47%)
GAC	gastric adenocarcinoma	6	111279082	95065100 (85.43%)
HCC	hepatocellular carcinoma	6	123268857	109936134 (89.18%)
LUAD	lung adenocarcinoma	6	114628338	95205664(83.06%)
LUSC	lung squamous cell carcinoma	6	111067728	93726455(84.39%)
PTC	papillary thyroid carcinoma	5	131415213	118458256 (90.14%)
SCLC	small cell lung carcinoma	6	120545181	102201003 (84.78%)
SRCC	gastric signet-ring cell carcinoma	3	96610081	83445461(86.37%)

## Sheet: Supplemental Table 2
Supplemental Table 2. Fraction of in 21 subpopulations of immune cell types in 50 patients.
Sample	type	cancer	cancer_type	B cells naive	B cells memory	Plasma cells	T cells CD8	T cells CD4 naive	T cells CD4 memory resting	T cells CD4 memory activated	T cells follicular helper	T cells regulatory (Tregs)	NK cells resting	NK cells activated	Monocytes	Macrophages M0	Macrophages M1	Macrophages M2	Dendritic cells resting	Dendritic cells activated	Mast cells resting	Mast cells activated	Eosinophils	Neutrophils
CSCC_F0209_T_E	tumor	CSCC	CSCC_tumor	0.0904355	0	0.0799017	0.170748	0	0.231528	0.0115752	0	0.0628863	0	0.0443223	0.0244357	0.0503014	0.102221	0.026029	0.0132514	0.00400644	0.0854155	0	0.00207417	0.000868133
CSCC_F0287_T_E	tumor	CSCC	CSCC_tumor	0	0	0.124198	0.0467662	0.0356423	0.273313	0.0551	0	0	0.0160425	0.05274	0.0235561	0.0702826	0.0695697	0.0159432	0.116836	0.0306456	0.0683093	0	0	0.00105551
CSCC_F0297_T_E	tumor	CSCC	CSCC_tumor	0	0.0754712	0.0331825	0.124634	0	0.204911	0.0254255	0	0.0557216	0	0.0654944	0.0253668	0.071999	0.168362	0.0213702	0.0240689	0	0.100884	0	0	0.00310839
CSCC_T0010_T	tumor	CSCC	CSCC_tumor	0.00725407	0.0141099	0.0690678	0.0870792	0	0.27881	0.00977718	0.0257311	0.057659	0	0.0522522	0.0121178	0.0891032	0.105737	0.0736128	0.0217764	0	0.0959118	0	0	0
CSCC_T0024_T	tumor	CSCC	CSCC_tumor	0	0.025839	0.0784048	0.186881	0	0.425368	0.00148776	0	0.0202288	0	0.0533443	0.0292268	0.0337574	0.0476548	0.035325	0.0185992	0	0.0438834	0	0	0
CSCC_T0045_T	tumor	CSCC	CSCC_tumor	0	0.0168683	0.0381947	0.0537517	0	0.17932	0.031431	0.037167	0.0108792	0	0.0784001	0.0911947	0.0674595	0.0843912	0.0453615	0.0443947	0.0829759	0.138211	0	0	0
ESCC_2_T_L	tumor	ESCC	ESCC_tumor	0	0.0123964	0.0193981	0.0434354	0	0.244173	0.066808	0	0	0	0.0801849	0.0101796	0.0920852	0.0566222	0.0985516	0.00663672	0.076707	0.16656	0	0.00270028	0.0235618
ESCC_X0525_T_E	tumor	ESCC	ESCC_tumor	0.0912819	0	0.1147	0.0533964	0	0.23683	0.0252361	0.000952834	0.0169977	0	0.0509525	0.023809	0.115183	0.0586434	0	0.0818547	0.0321781	0.0705812	0	0.0102282	0.0171752
ESCC_X0601_T_E	tumor	ESCC	ESCC_tumor	0.029433	0	0.0211137	0.189179	0	0.0919338	0.0747601	0.0270101	0.0215175	0	0.0811522	0.0266107	0.094193	0.0891367	0.0309169	0.0185753	0.0107123	0.143602	0	0.031671	0.0184822
ESCC_X0702_T_L	tumor	ESCC	ESCC_tumor	0.0402368	0.0134608	0.133526	0.156301	0	0.0510634	0.11907	0	0.0211285	0.0105866	0.0275658	0.00368333	0.105017	0.106397	0.0594333	0.0272756	0	0.107623	0	0	0.0176309
ESCC_X0704_T_L	tumor	ESCC	ESCC_tumor	0.0157192	0.0739894	0.0906776	0.0504198	0	0.198457	0	0.00835541	0.0124296	0	0.0698128	0.0291952	0	0.0154416	0.152863	0.0615696	0.00815743	0.192573	0	0.0178555	0.0024846
ESCC_X0724_T_E	tumor	ESCC	ESCC_tumor	0	0	0.0388659	0.00747873	0.0634904	0.200142	0.0128154	0	0	0	0.0849359	0.00351277	0.255236	0.0316457	0.0210408	0.0122263	0.197562	0.0543304	0	0	0.0167169
GAC_W0447_T_E	tumor	GAC	GAC_tumor	0	0.0178768	0.0558589	0.0579011	0	0.250123	0.0479058	0	0	0	0.0802301	0.00956157	0.0208754	0.0844778	0.114475	0.0752221	0.00741883	0.168768	0	0	0.00930666
GAC_W0451_T_E	tumor	GAC	GAC_tumor	0	0.0547775	0.0820468	0.121403	0	0.301686	0	0.00293226	0.00512449	0	0.086698	0.0229684	0.0621666	0.0442405	0.0589527	0.0201608	0	0.136843	0	0	0
GAC_W0505_T_E	tumor	GAC	GAC_tumor	0.0837558	0	0.160121	0.111697	0	0.318219	0	0.00675735	0.0221862	0	0.0446752	0.0416152	0.0028215	0.0174972	0.00969863	0	0.0158546	0.143493	0	0	0.0216089
GAC_W0620_T_L	tumor	GAC	GAC_tumor	0.0135469	0.0822675	0.0721397	0.0669646	0	0.275013	0.0219219	0	0.00401332	0	0.0167936	0.000252718	0.0575252	0.0264695	0.101409	0.062755	0	0.167611	0	0.00486046	0.0264562
GAC_W0627_T_L	tumor	GAC	GAC_tumor	0.00845493	0.00822046	0.0435071	0.0853508	0	0.257899	0.0255542	0	0.0509882	0	0.0423946	0.0326958	0.128226	0.0351779	0.0956538	0	0.0223981	0.141438	0	0	0.0220411
GAC_W0628_T_L	tumor	GAC	GAC_tumor	0.00575323	0.0142473	0.047282	0.149062	0	0.203531	0.0138173	0.0370232	0.0357748	0	0.0666224	0.0347881	0.137481	0.0605158	0.0166244	0.0611495	0	0.0808712	0	0.0242736	0.0111828
HCC_G0164_T_E	tumor	HCC	HCC_tumor	0.0118396	0	0.00125832	0.0584688	0	0.133035	0	0.00853694	0.00127344	0.0629032	0.0169717	0.0669113	0.261324	0.00747911	0.176335	0	0	0.193664	0	0	0
HCC_G0213_T_L	tumor	HCC	HCC_tumor	0.0296769	0	0.0349952	0.0718418	0	0.254213	0	0	0.0701557	0.0020445	0.0227261	0.000307654	0.148606	0.0397719	0.137925	0.0526897	0	0.0765474	0	0	0.0584996
HCC_G0218_T_L	tumor	HCC	HCC_tumor	0	0.00942811	0.0333416	0.0733468	0	0.340922	0	0	2.01658e-05	0	0.0773737	0.0227931	0.0686815	0.0524134	0.136586	0.0430231	0	0.0924935	0	0.0424917	0.00708508
HCC_G0224_T_L	tumor	HCC	HCC_tumor	0.0697791	0	0.0424926	0.346535	0	0.0677844	0.0152668	0.0715714	0.117003	0	0.0389477	0.0206963	0.02506	0.0719992	0.0602988	0.00528369	0	0.0306932	0	0	0.0165888
HCC_G0228_T_E	tumor	HCC	HCC_tumor	0.0169465	0.00645453	0.00769513	0.136523	0	0.19524	0	0	0.0316269	0.0442336	0.0709714	0.132699	0	0.03301	0.193332	0.0425839	0	0.0859711	0	0	0.00271372
HCC_G0267_T_E	tumor	HCC	HCC_tumor	0.150777	0	0.0118995	0	0	0.159318	0	0.0193814	0	0	0.0957831	0.0739637	0.00672874	0.04768	0.2611	0	0.0340928	0.0395315	0	0.0997445	0
LUAD_3_T_E	tumor	LUAD	LUAD_tumor	0.17767	0	0.297825	0.052273	0	0.0626374	0	0	0.0350937	0	0.0347233	0	0.228892	0.0102248	0.0175146	0	0	0	0.0203547	0.014741	0.0480498
LUAD_X0147_T_L	tumor	LUAD	LUAD_tumor	0	0.038273	0.100721	0.0716972	0	0.285857	0	0.00423336	0	0.0150735	0.042966	0.0280619	0.132428	0.0200931	0.10369	0	0.117147	0.03565	0	0.00410811	0
LUAD_X0668_T_E	tumor	LUAD	LUAD_tumor	0	0.0163716	0.019833	0.0685827	0	0.192226	0.0741175	0.00241621	0.0419426	0	0.0479491	0.0166079	0.149864	0.0388553	0.101489	0.0580612	0.0339486	0.128066	0	0.00329296	0.00637564
LUAD_X0687_T_L	tumor	LUAD	LUAD_tumor	0.0429578	0	0.0627125	0.155486	0	0.154405	0.0927697	0	0.0433753	0.0237126	0.0207227	0.0228161	0.0985028	0.0385571	0.0598548	0.0273719	0.0701372	0.0730526	0	0	0.0135664
LUAD_X0742_T_L	tumor	LUAD	LUAD_tumor	0.0522466	0	0.10891	0.118341	0	0.173139	0.0968465	0.0184046	0.0187538	0.0391437	0.0125688	0.0115066	0.102272	0.0365597	0.0639258	0.036277	0.0170199	0.088169	0	0.00330998	0.00260521
LUAD_X0803_T_E	tumor	LUAD	LUAD_tumor	0.0480238	0	0.0571171	0.023593	0	0.317033	0.00815969	0	0.00291998	0	0.0618572	0.0138634	0.030261	0.00465794	0.112807	0.08815	0.0298879	0.164615	0	0.00428643	0.0327683
LUSC_8_T_L	tumor	LUSC	LUSC_tumor	0.0140175	0.0199192	0.0995594	0.0516988	0	0.172717	0.020029	0	0.0122991	0	0.0586709	0.00525336	0.107678	0.00795155	0.110499	0.0393313	0.104497	0.108938	0	0.01469	0.0522492
LUSC_X0627_T_L	tumor	LUSC	LUSC_tumor	0.0940595	0	0.10374	0.118477	0	0.153645	0.0957686	0.00126114	0.00158038	0.0159911	0	0.00591321	0.173012	0.0667535	0.0859247	0.0231017	0.00552867	0.0440451	0	0.00234814	0.00884945
LUSC_X0689_T_E	tumor	LUSC	LUSC_tumor	0	0.092998	0.252461	0.186872	0	0.100463	0.00507022	0	0.0365418	0	0.0412105	0.0117447	0.0785589	0.00944759	0.109151	0	0.0169191	0.058562	0	0	0
LUSC_X0703_T_L	tumor	LUSC	LUSC_tumor	0.0631932	0	0.0756835	0.0767767	0	0.213081	0	0.00519586	0.00585825	0	0.107819	0.0505331	0.0705149	0.0154812	0.0260675	0	0.0156772	0.260924	0	0	0.013194
LUSC_X0753_T_E	tumor	LUSC	LUSC_tumor	0.00366775	0	0.0350517	0.187916	0	0.0908702	0.121075	0.00898412	0	0	0.0637424	0.0388325	0.133001	0.0235351	0.0233199	0.041067	0.0949264	0.129293	0	0	0.00471787
LUSC_X622_T_E	tumor	LUSC	LUSC_tumor	0.12183	0	0.0345243	0.092128	0.00712424	0.196221	0.00552032	0	0.0188225	0	0.0988107	0.0283043	0.160225	0.0320124	0.058434	0	0.00622618	0.137933	0	0	0.00188246
PTC_J0921_T	tumor	PTC	PTC_tumor	0.167742	0	0.2044	0.0561217	0	0.16352	0.00291055	0.0112119	0	0	0.0505848	0	0.0913102	0.0184863	0.140641	0.00802749	0.023207	0.0618371	0	0	0
PTC_J0922_T	tumor	PTC	PTC_tumor	0.00208111	0.11322	0.0400137	0.176947	0	0.17255	0.00201649	0.0474701	0.0500348	0	0.0487387	0.00871388	0.0735215	0.0866435	0.108729	0.00689028	0	0.0511414	0	0.00962982	0.00165883
PTC_J0923_T	tumor	PTC	PTC_tumor	0.0660712	0.178672	0.0338616	0.0629262	0	0.286015	0.0498723	0	0.00421297	0	0.0282562	0.0233104	0.0765095	0.00201468	0.0695966	0.0188838	0.0289613	0.0521247	0	0.0187119	0
PTC_J0924_T	tumor	PTC	PTC_tumor	0.000142519	0.0196118	0.1273	0.0669293	0	0.384603	0	0.00519171	0.02544	0.0086397	0.029373	0.0712077	0.0266767	0.0305067	0.0448493	0.127267	0.000117375	0.0321433	0	0	0
PTC_J0925_T	tumor	PTC	PTC_tumor	0.0200274	0.0218676	0.00850022	0.0297891	0	0.413566	0	0	0.013218	0.0575806	0.00982083	0.0524192	0.130255	0.0145804	0.107385	0.0545383	0.00425771	0.0262245	0	0.0287951	0.00717468
SCLC_1_T_L	tumor	SCLC	SCLC_tumor	0	0.0268515	0.209939	0.126785	0	0.119267	0	0.124726	0.0127808	0	0.082276	0.0308113	0.0769381	0.0480296	0.0658595	0.0362813	0.014715	0.0196522	0	0	0.00508807
SCLC_6_T_E	tumor	SCLC	SCLC_tumor	0	0.0860792	0.0756342	0.0631884	0	0.0756504	0	0.0778005	0	0	0	0.00645402	0.420598	0	0.135029	0.00840265	0	0.0420397	0	0	0.00912327
SCLC_X0212_T_L	tumor	SCLC	SCLC_tumor	0.137242	0	0.220556	0.171936	0	0.0925211	0.0128101	0.0419497	0.0100111	0	0.0442764	0.00680627	0.0728405	0.0549073	0.0773627	0.0274026	0	0.0293783	0	0	0
SCLC_X0242_T_E	tumor	SCLC	SCLC_tumor	0.0238703	0	0.0725685	0.0627239	0	0.142216	0.0227031	0	0.015063	0	0.0319638	0	0.444466	0.0345905	0.0858947	0	0	0.0426835	0	0	0.0212562
SCLC_X0272_T_L	tumor	SCLC	SCLC_tumor	0.00491688	0.0696062	0.166531	0.23961	0	0.149756	0.0442433	0	0.0473212	0.0022913	0.0381902	0.0153799	0.0249519	0.0255855	0.0758655	0.00361222	0.0150868	0.0770511	0	0	0
SCLC_X0608_T_E	tumor	SCLC	SCLC_tumor	0.107679	0	0.128661	0.138654	0	0.0963209	0	0.0476546	0.0569627	0	0.065191	0.0130643	0.190822	0.0606698	0.0470591	0	0	0.047262	0	0	0
SRCC_W0064_T_L	tumor	SRCC	SRCC_tumor	0.0216588	0	0.0178798	0.0188836	0	0.194728	0.028112	0	0	0.0740986	0	0.0151114	0.316059	0.0198302	0.112366	0	0	0	0.0707362	0	0.110536
SRCC_W0158_T_L	tumor	SRCC	SRCC_tumor	0.0889849	0	0.037987	0.12769	0	0.346017	0.0126006	0	0.041569	0	0	0.0158927	0.10962	0.0336474	0.0372199	0.0306491	0	0.00817604	0.000372203	0.0294823	0.0800917
SRCC_W0207_T_L	tumor	SRCC	SRCC_tumor	0.016902	0	0.0121361	0.16181	0	0.313773	0	0	0	0.00931491	0	0.0653997	0.0126502	0.0415083	0.248402	0.0196725	0	0.0984311	0	0	0
CSCC_F0209_N_E	normal	CSCC	CSCC_normal	0.0535869	0	0.16222	0.157673	0	0.327092	0	0	0	0	0.0654088	0.022541	0.0313511	0.0110759	0.0674526	0.0315474	0	0.0700514	0	0	0
CSCC_F0287_N_E	normal	CSCC	CSCC_normal	0	0.0263734	0.0615165	0.100648	0	0.350503	0	0	0	0	0.0709858	0.037258	0.0164653	0.0159939	0.0726254	0.0611062	0.00130233	0.180967	0	0	0.00425531
CSCC_F0297_N_E	normal	CSCC	CSCC_normal	0	0.0276763	0.0674725	0.112798	0	0.239152	0	0	0	0	0.126825	0.0686677	0.0468039	0.010832	0.124641	0.0310688	0.00530901	0.138754	0	0	0
CSCC_T0010_N	normal	CSCC	CSCC_normal	0.0153562	0.00213331	0	0.0825486	0	0.174461	0	0.0382915	0	0	0.0806713	0.0465338	0	0.0189446	0.199418	0.0116124	0	0.330029	0	0	0
CSCC_T0024_N	normal	CSCC	CSCC_normal	0	0.0104117	0.0584348	0.184484	0	0.348234	0	0	0	0.00321184	0.0909862	0.022466	0.00359843	0.0182713	0.119287	0.00348055	0	0.0989424	0	0.0381919	0
CSCC_T0045_N	normal	CSCC	CSCC_normal	0	0.0571635	0.0691784	0.139352	0	0.332475	0.0868938	0	0	0	0	0.0317775	0.0416042	0.00690416	0.0466126	0.00486898	0.0192286	0.162854	0	0.00061344	0.000474313
ESCC_2_N_L	normal	ESCC	ESCC_normal	0	0.00262346	0.00746455	0.0631008	0	0.242711	0.0507933	0	0	0	0.0480995	0.0176702	0.014085	0.057375	0.134457	0.056036	0.0612978	0.220554	0	0.0224398	0.00129302
ESCC_X0525_N_E	normal	ESCC	ESCC_normal	0	0.000848657	0.0671243	0.147943	0	0.412159	0.0384169	0	0	0	0.00872117	0.015434	0.00604955	0.0102758	0.0444918	0.084689	0.0106603	0.153187	0	0	0
ESCC_X0601_N_E	normal	ESCC	ESCC_normal	0	0.00972574	0.160521	0.162242	0	0.259724	0.0280167	0	0	0.0218794	0	0.0121453	0	0.00176316	0.11011	0.0641747	0.00236789	0.167329	0	0	0
ESCC_X0702_N_L	normal	ESCC	ESCC_normal	0.185008	0	0.10848	0.112733	0	0.235304	0	0.0234967	0	0	0.0831486	0.0286672	0	0.012477	0.048809	0.0180923	0.00441851	0.1379	0	0	0.00146599
ESCC_X0704_N_L	normal	ESCC	ESCC_normal	0.0337117	0	0.0582128	0.0755502	0.00383184	0.172633	0.0715669	0	0	0	0.0519735	0	0.274382	0.0765759	0.0656687	0	0	0.110422	0	0	0.00547161
ESCC_X0724_N_E	normal	ESCC	ESCC_normal	0	0.0296151	0.0536067	0.10108	0	0.301888	0.0274622	0	0	0	0.0402504	0.0182459	0.0026513	0.0181009	0.112003	0.0753902	0.00660895	0.213098	0	0	0
GAC_W0447_N_E	normal	GAC	GAC_normal	0	0.279208	0.100241	0.11372	0	0.272096	0.0256227	0.010745	0.0234637	0	0.0407892	0.0091842	0.0201019	0.0152327	0.0117394	0.0150248	0.00617936	0.0566527	0	0	0
GAC_W0451_N_E	normal	GAC	GAC_normal	0	0.0212831	0.225888	0.149282	0	0.342535	0.0109944	0	0	0.0121835	0.00385234	0.0114597	0	0.00623942	0.027639	0.0316342	0	0.15701	0	0	0
GAC_W0505_N_E	normal	GAC	GAC_normal	0.0949062	0.197184	0.108642	0.144138	0	0.232991	0	0.00209516	0.0367992	0.00277953	0.0438775	0.0229515	0.037349	0.0137155	0	0	0.00928566	0.0532848	0	0	0
GAC_W0620_N_L	normal	GAC	GAC_normal	0	0.191274	0.198498	0.197366	0	0.212082	0.0153016	0	0.0272347	0.030942	0	0.00518572	0.0214374	0.00276688	0.0389964	0	0.00135897	0.043996	0.0107207	0.0028394	0
GAC_W0627_N_L	normal	GAC	GAC_normal	0	0.069838	0.189537	0.128816	0	0.256649	0.0456826	0	0.0310711	0.0139227	3.62154e-05	0.00445884	0.00723667	0.0727162	0.0625425	0.016628	0.00292008	0.0953576	0	0	0.00258735
GAC_W0628_N_L	normal	GAC	GAC_normal	0.096188	0	0.109441	0.181303	0	0.304656	0	0	0	0	0.0192078	0.0221403	0	0.00377038	0.0446757	0.036694	0	0.167103	0.00302907	0.0117916	0
HCC_G0164_N_E	normal	HCC	HCC_normal	0	0.0206364	0.0141584	0.132792	0	0.208503	0	0	0.00453442	0.0162712	0.0260503	0.0295627	0.0104662	0.121771	0.305321	0.0163836	0	0.0758361	0	0	0.0177134
HCC_G0213_N_L	normal	HCC	HCC_normal	0.0995854	0	0.0602421	0.120599	0	0.293873	0	0	0.0496609	0	0.0515947	0.0190231	0.0361387	0.0737062	0.088844	0.0385056	0	0.0682273	0	0	0
HCC_G0218_N_L	normal	HCC	HCC_normal	0.0457729	0	0.0378458	0.157377	0	0.247949	0	0.000806867	0.0390102	0	0.0546233	0.023013	0.0261694	0.0624244	0.223234	0.0350898	0	0.0299458	0	0	0.0167393
HCC_G0224_N_L	normal	HCC	HCC_normal	0.0340621	0	0.0374466	0.119524	0	0.226257	0	0	0.00432945	0.0038466	0.0670872	0.0421233	0	0.0797592	0.273448	0.0117731	0	0.0898307	0	0	0.0105124
HCC_G0228_N_E	normal	HCC	HCC_normal	0	0.0415026	0.0283339	0.147186	0	0.178606	0	0	0.0287861	0.00602915	0.0615823	0.0112494	0.00538354	0.113411	0.281896	0.0310568	0	0.0412579	0	0	0.0237189
HCC_G0267_N_E	normal	HCC	HCC_normal	0.172965	0	0.108408	0.0433266	0	0.178782	0	0	0.0096172	0	0.149273	0.0829126	0.00831434	0.0154766	0.146466	0	0	0	0.0506642	0	0.0337942
LUAD_3_N_E	normal	LUAD	LUAD_normal	0.145714	0	0.205128	0.0556529	0	0.121996	0.000526993	0.0253715	0.0136115	0	0.0795248	0.0102464	0.139579	0.0118349	0.0269595	0	0	0.0535703	0	0.0172932	0.0929918
LUAD_X0147_N_L	normal	LUAD	LUAD_normal	0.0387221	0	0.0203817	0.0978483	0	0.213127	0	0	0	0.00183604	0.0434636	0.0177158	0.206221	0	0.169118	0	0.0880134	0.068258	0	0.0155477	0.0197474
LUAD_X0668_N_E	normal	LUAD	LUAD_normal	0.0320173	0	0.00600207	0.0989836	0	0.298692	0	0	0.0079698	0	0.0663781	0.0286186	0.181423	0	0.0526858	0.000317797	0.0810594	0.0860122	0	0.0536291	0.00621163
LUAD_X0687_N_L	normal	LUAD	LUAD_normal	0.0938195	0	0.114249	0.0660037	0	0.258937	0.00298307	0	0	0	0.0356823	0.0192186	0.175683	0.00512271	0.0477027	0.00768112	0.0021624	0.133288	0	0.00920125	0.0282655
LUAD_X0742_N_L	normal	LUAD	LUAD_normal	0.00669198	0.0120694	0.0145603	0.161122	0	0.230928	0	0	0	0.0691927	0.0144029	0.0446203	0.168426	0	0.0829606	0	0.0680347	0.0954522	0	0.0190745	0.0124644
LUAD_X0803_N_E	normal	LUAD	LUAD_normal	0.0355402	0	0.00848214	0.119429	0	0.296621	0	0	0.000325891	0.0108156	0.0351823	0.0189486	0.165287	0	0.115529	0.00883754	0.0337462	0.140184	0	0	0.0110716
LUSC_8_N_L	normal	LUSC	LUSC_normal	0.122677	0	0.0332684	0.12295	0	0.289562	0.00572962	0	0	0.0406339	0.00790382	0.0392247	0.0489834	0.00960443	0.0740764	0.0118468	0.0169979	0.096862	0	0.0138179	0.0658614
LUSC_X0627_N_L	normal	LUSC	LUSC_normal	0.0674116	0	0.0572787	0.0980237	0	0.246302	0.00253699	0	0	0	0.0396401	0.0247874	0.0990261	0	0.0984346	0	0.0768056	0.126125	0	0.0363817	0.0272472
LUSC_X0689_N_E	normal	LUSC	LUSC_normal	0	0.110085	0.127507	0.0633009	0	0.278693	0.00667033	0	0.0241797	0	0.0660294	0.0165521	0.0736761	0	0.0967011	0	0.0816769	0.0441313	0	0	0.0107973
LUSC_X0703_N_L	normal	LUSC	LUSC_normal	0.0443985	0	0.0336873	0.0727492	0	0.307605	0.00217342	0	0	0.0390485	0.0230308	0.0350655	0.0675876	0	0.0670982	0	0.123589	0.117393	0	0.0359325	0.0306412
LUSC_X0753_N_E	normal	LUSC	LUSC_normal	0	0.00227909	0.0137487	0.184432	0	0.182919	0	0	0	0.0197401	0.0822311	0.032971	0.202254	0.00398975	0.0506749	0.000561735	0.0420076	0.142472	0	0.0329598	0.0067597
LUSC_X622_N_E	normal	LUSC	LUSC_normal	0.0882748	0	0.0889445	0.160189	0	0.309114	0	0	0.0185963	0	0.0686265	0.0275926	0.0442143	0.0112383	0.0958483	0.00049565	0.0109585	0.0699289	0	0.00279311	0.00318611
PTC_J0921_N	normal	PTC	PTC_normal	0.131106	0.0975165	0.11806	0.210329	0	0.0843772	0.0287831	0	0.0384818	0	0.0140417	0.0257788	0.0435799	0.0851141	0.0412615	0.00606757	0	0.0672574	0	0.00824585	0
PTC_J0922_N	normal	PTC	PTC_normal	0.012703	0.11016	0.0395031	0.206803	0	0.134625	0	0.0284473	0.0690825	0	0.0520291	0.0100778	0.0718662	0.100107	0.0749144	0.00935698	0	0.0653064	0	0.0150191	0
PTC_J0923_N	normal	PTC	PTC_normal	0.0741325	0.183513	0.0152756	0.059522	0	0.342222	0.064509	0	0	0.00165632	0.0074506	0.0309372	0.0490638	0.0116704	0.0481202	0.019792	0.0236973	0.0432058	0	0.0252323	0
PTC_J0924_N	normal	PTC	PTC_normal	0	0.0411259	0.105148	0.123434	0	0.359567	0	0.00508396	0	0	0.0349705	0.0379583	0	0.058458	0.0799085	0.0379564	0	0.0361371	0	0.0226012	0.0576516
PTC_J0925_N	normal	PTC	PTC_normal	0	0.0165341	0.0125138	0.267364	0	0.361465	0	0	0	0	0.040273	0.0576607	0.0517253	0.0155849	0.0284322	0	0	0.135142	0	0.00221975	0.0110849
SCLC_1_N_L	normal	SCLC	SCLC_normal	0	0.0197352	0.0705902	0.114519	0.000266329	0.194461	0.06569	0	0	0	0.0629434	0.0139012	0.102261	0.0672654	0.104852	0.0701896	0.00379487	0.102106	0	0.00742347	0
SCLC_6_N_E	normal	SCLC	SCLC_normal	0.0381118	0	0.0562087	0.0482421	0	0.212746	0.00801522	0	0.00856634	0	0.0286784	0.0224445	0.200487	0.0271943	0.24591	0.0149232	0.00224439	0.0768368	0	0	0.00939098
SCLC_X0212_N_L	normal	SCLC	SCLC_normal	0.0114147	0.00470436	0.0189614	0.131575	0	0.297202	0.0247086	0	0.00747203	0.0313295	0.0436764	0.0218778	0.120759	0.0655245	0.0890105	0.0161482	0	0.0852936	0	0.0134546	0.0168877
SCLC_X0242_N_E	normal	SCLC	SCLC_normal	0.0487546	0	0.0274635	0.0806439	0	0.24688	0	0	0	0	0.0783033	0.0391907	0.134823	0.0122563	0.151252	0.00377498	0.0475462	0.122139	0	0	0.00697097
SCLC_X0272_N_L	normal	SCLC	SCLC_normal	0.0870431	0	0.0265632	0.107988	0	0.347452	0	0	0	0.00813018	0.0703871	0.0343017	0.0693615	0.00164306	0.0630101	0.00870918	0.0435053	0.110845	0	0.0035857	0.0174742
SCLC_X0608_N_E	normal	SCLC	SCLC_normal	0.0454418	0	0.0154189	0.128325	0	0.212322	0.0389412	0	0.0294179	0	0.0361795	0.0186637	0.135274	0.125981	0.0876824	0.0250996	0	0.0842486	0	0.00345477	0.0135486
SRCC_W0064_N_L	normal	SRCC	SRCC_normal	0.037371	0	0.0276367	0	0	0.157096	0.0381505	0	0	0.0600403	0	0.0173034	0	0.00333497	0.122941	0.00478706	0	0.0674071	0	0.0814951	0.382437
SRCC_W0158_N_L	normal	SRCC	SRCC_normal	0.148745	0	0.236835	0.166586	0	0.282339	0	0	0.0148822	0	0.0118268	0.0349801	0	0.0114798	0.0336679	0	0.0102302	0.0328261	0.00216245	0	0.0134388
SRCC_W0207_N_L	normal	SRCC	SRCC_normal	0.077	0	0.0869917	0.230146	0	0.314641	0	0	0	0.0277969	0	0.0293233	0	0.00486371	0.0631529	0.00312771	0.000903182	0.107051	0	0.021058	0.0339452
pvalue (tumor vs normal)				0.203274	0.120627	0.263522	0.0189507	0.0827041	8.5983e-05	0.0277358	0.00358928	0.000698781	0.380015	0.235817	0.488713	0.00145014	0.017039	0.0893387	0.0101035	0.220713	0.080127	0.392716	0.205883	0.169877
							*		***	*	**	***				**	*		*

## Sheet: Supplemental Table 3
Supplemental Table 3. Correlation of WGCNA modules with tumor group.
module	correlation	pvalue
MEdarkmagenta	0.141073	0.161513
MEplum2	0.100709	0.31878
MEsalmon4	0.162499	0.106242
MEbrown	-0.114269	0.25762
MEdarkorange2	-0.17992	0.0732573
MEdarkgrey	0.141066	0.161532
MEskyblue3	0.114685	0.255881
MEdarkturquoise	0.169662	0.0914983
MEtan	0.148861	0.139369
MEdarkorange	0.140317	0.163792
MElightsteelblue1	0.156456	0.12007
MEturquoise	0.140374	0.16362
MEyellow	0.473025	6.7e-07
MEsienna3	0.159131	0.113786
MEorangered4	0.147679	0.142574
MEdarkslateblue	0.158688	0.114809
MEgreen	-0.0996682	0.323834
MEivory	0.275477	0.00553673
MEpurple	0.237916	0.0171451
MElightcyan	0.280356	0.00472498
MEwhite	0.514098	4.48e-08
MEnavajowhite2	0.137127	0.173682
MEpaleturquoise	0.243565	0.0146091
MEviolet	0.221463	0.0268043
MEpalevioletred3	0.224001	0.0250649
MEdarkolivegreen	0.137664	0.171987
MEfloralwhite	0.154287	0.125358
MEsteelblue	0.14443	0.151666
MEplum1	0.241879	0.0153296
MEroyalblue	0.191359	0.0564952
MElightcyan1	0.110694	0.272905
MEmidnightblue	-0.0619859	0.540104
MEcyan	-0.143318	0.154876
MEyellowgreen	0.0156359	0.877292
MEskyblue	-0.119524	0.23623
MEthistle2	-0.146511	0.145793
MEmagenta	-0.24447	0.014235
MEthistle1	-0.124284	0.21795
MEdarkgreen	0.252645	0.0112137
MEgreenyellow	-0.0290662	0.77406
MEred	-0.164234	0.102511
MEorange	0.163483	0.104114
MEsaddlebrown	0.18296	0.0684531
MEpink	-0.14184	0.159223
MEblack	-0.218273	0.0291339
MEblue	-0.409617	2.32e-05
MEmediumpurple3	-0.389115	6.3e-05
MEdarkred	-0.361809	0.000216682
MElightgreen	-0.0829606	0.411879
MEgrey60	-0.208718	0.0371651
MEsalmon	-0.127484	0.206239
MEbisque4	-0.0136415	0.892844
MEbrown4	0.0594724	0.556688
MElightyellow	0.250347	0.0120004
MEgrey	0.370039	0.000151077

## Sheet: Supplemental Table 4
Supplemental Table 4. Correlation of WGCNA modules with immune cell type population.
Sample	B cells naive	B cells memory	Plasma cells	T cells CD8	T cells CD4 naive	T cells CD4 memory resting	T cells CD4 memory activated	T cells follicular helper	T cells regulatory (Tregs)	NK cells resting	NK cells activated	Monocytes	Macrophages M0	Macrophages M1	Macrophages M2	Dendritic cells resting	Dendritic cells activated	Mast cells resting	Mast cells activated	Eosinophils	Neutrophils
MEdarkmagenta	-0.0630316	-0.0629595	-0.0779523	-0.0810698	-0.00604431	0.0906933	-0.0733746	0.00374517	-0.0236292	-0.0606644	0.0811631	-0.0524599	0.0408148	0.040954	0.0687212	0.0673255	-0.0677457	-0.0143863	-0.0262241	0.202355	-0.0100379
MEplum2	-0.0304825	-0.0680013	-0.11633	-0.0471495	0.0260529	0.00594341	-0.0895674	-0.0236083	0.293864	-0.0192502	-0.0476129	-0.109354	0.0768417	0.0275144	0.0963717	0.0659594	-0.0391275	-0.0498983	-0.00978688	-0.023853	0.10767
MEsalmon4	0.0700327	-0.0827496	-0.0792323	0.344938	-0.0328153	-0.226098	-0.0395528	0.377437	0.490467	-0.048726	-0.0189972	0.00995681	-0.0263456	0.125973	-0.000341189	-0.0533398	-0.105359	-0.123448	-0.0216579	-0.035308	0.000698176
MEbrown	0.0387362	-0.10939	-0.232375	0.0963614	-0.0776646	-0.0870837	-0.249149	-0.0228657	0.225977	0.0716006	0.114409	0.229591	-0.188797	0.270567	0.607235	-0.0278435	-0.198753	-0.176559	0.0758409	-0.0326463	-0.00844614
MEdarkorange2	0.230962	-0.117523	-0.0679983	-0.0519892	-0.0421411	-0.0594353	-0.165252	-0.0898042	0.0928682	-0.0283881	0.307202	0.238453	-0.139364	0.0744402	0.327032	-0.0927395	-0.0999886	-0.225928	0.481513	-0.0681148	0.0514694
MEdarkgrey	0.209298	-0.101462	-0.171259	-0.176671	-0.0159868	-0.129208	-0.117149	0.0791628	-0.00599465	0.0208575	0.168507	0.308775	-0.0769304	0.0636527	0.356102	-0.0928711	-0.0165264	-0.0860599	-0.00988078	0.509336	-0.0308225
MEskyblue3	0.033147	-0.10336	-0.190646	-0.108554	-0.0372804	-0.163492	-0.140235	0.0700127	-0.0195952	0.269669	-0.00725468	0.285582	0.145266	-0.015338	0.310615	-0.12973	-0.0802143	0.0703014	-0.0180632	0.130974	-0.0564938
MEdarkturquoise	0.114247	-0.0541534	0.0858452	-0.00165857	-0.0139767	-0.137356	0.298341	0.0360888	-0.0618437	-0.0191695	-0.14882	-0.145275	0.161426	0.0974031	-0.0782782	0.0158961	-0.0567774	-0.0763063	-0.0403514	-0.0663699	-0.0414835
MEtan	0.103358	-0.0572541	0.133786	0.0239579	-0.00554993	-0.22909	-0.0368286	0.372482	0.142705	-0.0923856	0.059329	-0.113337	0.220632	0.0717097	-0.0907903	-0.0680826	-0.0796339	-0.124305	-0.0353317	-0.0751708	-0.0543952
MEdarkorange	-0.0231658	-0.0716656	0.0452792	-0.0866029	-0.0167927	-0.178842	0.00721003	0.138434	-0.0157279	-0.0789221	-0.0412287	-0.161387	0.478364	-0.00669682	-0.0277175	-0.0842487	-0.0835026	-0.119543	-0.0294971	-0.072953	-0.00269809
MElightsteelblue1	0.159297	-0.0565357	0.264762	0.0734766	-0.00226615	-0.2295	-2.26362e-05	0.303903	-0.035797	-0.0854153	-0.00386767	-0.148057	0.119324	0.0476713	-0.0594258	0.00449836	-0.0586181	-0.160444	-0.0282239	-0.0952989	-0.0608021
MEturquoise	-0.0251371	-0.0177796	0.163459	-0.0759554	-0.0246945	-0.300159	-0.00430649	0.55403	-0.0721348	-0.141643	-0.0451889	-0.163762	0.404781	-0.000253496	0.0615244	0.0102622	-0.110689	-0.172412	-0.0733397	-0.1139	-0.0660918
MEyellow	0.027634	-0.125975	0.171834	-0.153673	0.118294	-0.45717	0.328176	0.441698	0.00678169	-0.222367	0.0964261	-0.196725	0.444631	0.216153	-0.203132	0.136902	0.0413967	-0.0636274	-0.0613783	-0.156212	-0.0845132
MEsienna3	-0.0594329	-0.0375251	0.0366357	-0.128508	0.0267122	-0.0948928	0.0694801	-0.0237095	-0.0471857	-0.0851126	0.0520393	-0.126606	0.065961	-0.0644973	-0.0269974	0.086343	0.262393	0.0767466	-0.0393244	0.00804353	0.0655167
MEorangered4	-0.0298114	-0.0665549	-0.0984441	0.0846784	0.0330509	-0.167814	0.25353	0.110893	0.00890121	-0.079355	0.119228	-0.0402368	0.0586021	0.16199	-0.159964	-0.00528515	2.69178e-05	0.109434	-0.0162354	0.133264	0.00461696
MEdarkslateblue	0.0867032	-0.0675858	0.0546314	-0.110351	0.0221904	-0.0199733	0.0677221	0.000353438	-0.0184125	-0.0750591	0.0528844	-0.00853439	0.0685105	0.0646004	-0.213278	0.228506	0.0557548	0.0114738	-0.0475763	-0.0145172	-0.0183116
MEgreen	-0.0998661	-0.0777881	0.0591484	-0.0396457	0.0485001	0.160785	0.0968543	-0.08981	-0.19085	-0.138151	0.152259	0.0239943	-0.187662	-0.081608	-0.151979	0.383355	-0.0265232	0.378557	-0.0781864	-0.166832	-0.128489
MEivory	-0.0765741	-0.0942106	-0.0240639	-0.0778166	0.174031	-0.0965523	0.16033	0.123526	0.108521	-0.158215	0.187078	0.159204	0.00810281	0.356884	-0.264063	0.168214	0.171182	0.133544	-0.0854043	-0.161333	-0.12421
MEpurple	0.0431739	-0.0952277	0.0178179	-0.0985006	0.0758821	-0.091891	0.0792608	0.0495036	-0.0614421	-0.119459	0.226619	0.0670297	0.0454948	0.00034019	-0.214309	-0.0023195	0.0493984	0.328427	-0.0718257	-0.081886	-0.0588258
MElightcyan	-0.0470801	-0.133565	-0.0775535	-0.0224525	0.158909	-0.203847	0.431664	-0.00379457	-0.089294	-0.14477	0.214683	0.0408923	0.0986811	0.0576978	-0.234707	0.155975	0.266628	0.209173	-0.0396978	-0.0985952	-0.0732107
MEwhite	0.0555093	-0.190812	0.0460016	-0.190239	0.187794	-0.34596	0.502167	0.140782	-0.0407828	-0.166565	0.211214	-0.0966851	0.240238	0.183805	-0.315327	0.196663	0.14981	0.201104	-0.0321486	-0.0819159	-0.0544575
MEnavajowhite2	-0.029757	-0.134833	-0.0262997	-0.207262	0.30498	-0.187039	0.350042	-0.0394972	-0.0662547	-0.115674	0.144193	-0.184069	0.322252	0.173507	-0.195986	-0.00276544	0.154579	0.0924712	0.027849	-0.111407	-0.0243212
MEpaleturquoise	-0.127195	-0.0712935	0.0353359	-0.184069	0.699015	-0.0487115	0.27472	-0.0520597	-0.0415765	-0.042762	0.132421	-0.0962941	0.112684	0.218897	-0.286503	0.313559	0.216728	0.0192037	-0.0335635	-0.129009	-0.0817385
MEviolet	-0.0925432	-0.11468	-0.0675497	-0.221936	0.876156	-0.126208	0.162653	-0.0240085	-0.0796468	-0.0892415	0.18089	-0.144577	0.260158	0.053296	-0.209363	0.0258493	0.530233	0.0189383	-0.0334015	-0.0667288	-0.0196151
MEpalevioletred3	-0.0944763	-0.0253513	-0.0389747	0.0244603	-0.0092142	-0.0285679	0.0346452	0.152026	0.115519	-0.0657252	0.0495878	0.0302794	0.0805647	0.0857622	-0.172771	0.164868	-0.072127	0.0367879	-0.0284642	0.0298982	-0.0296439
MEdarkolivegreen	0.325545	-0.116554	0.337294	-0.204499	0.0528766	-0.262458	0.0529257	0.0331182	0.0847483	-0.0580546	0.0312191	-0.198555	0.246791	-0.0867178	-0.241398	-0.0951431	0.00691634	-0.142699	0.162638	0.0375466	0.190332
MEfloralwhite	0.0362601	-0.0335788	0.0225456	0.033054	-0.0157961	-0.115729	0.281091	-0.0435682	0.14556	0.0646817	-0.0961327	-0.0766365	0.0556976	-0.00269491	-0.116404	-0.00471807	0.153152	-0.0482362	0.00509704	-0.0451469	0.0115549
MEsteelblue	0.0370823	-0.0194214	0.0202945	-0.17838	-0.0262355	0.131288	-0.0106809	-0.0687532	-0.0557168	-0.0391929	-0.0170484	-0.108859	-0.0410261	-0.134917	-0.0517867	0.215555	0.0881549	0.0943641	-0.0234096	-0.0182912	0.0392996
MEplum1	0.0213861	-0.060526	0.0601525	-0.0995943	0.0510393	-0.0816281	0.339651	0.0481664	0.0158569	0.14181	-0.0904066	-0.120582	0.0954763	-0.00488455	-0.110596	0.126449	0.080501	-0.0197289	-0.0396688	-0.0450699	-0.0593206
MEroyalblue	-0.0660228	-0.0366639	-0.0786522	-0.149896	0.0582743	-0.0750027	0.251621	-0.015134	0.104822	-0.0447573	0.000330475	-0.0980495	0.170163	-0.0219907	-0.0589475	0.143555	0.117188	0.05077	-0.0173949	-0.0413168	-0.0376225
MElightcyan1	-0.0954473	0.0853752	0.0924776	-0.0446216	0.0277989	0.0517028	-0.0574234	-0.0504082	-0.0269409	0.00717909	-0.000203319	-0.071297	0.107041	-0.0856213	-0.0659342	-0.121628	0.345424	-0.148193	-0.032287	-0.0623215	-0.0855661
MEmidnightblue	-0.151293	0.426748	0.22435	0.160152	0.0786693	0.0547076	-0.00886457	-0.142852	0.0842754	-0.0548366	-0.0256532	-0.20665	0.0480709	-0.138547	-0.253528	-0.229849	0.235435	-0.190126	-0.0559878	-0.150864	-0.1673
MEcyan	0.0776927	0.725674	0.0390873	0.148467	-0.0925923	0.0086878	0.188827	-0.113044	0.210663	-0.111607	-0.263016	-0.185108	-0.12439	0.0565683	-0.227904	-0.134956	-0.0652087	-0.188105	-0.035011	-0.0147857	-0.130761
MEyellowgreen	0.174638	0.449123	0.410887	0.184684	-0.0940345	-0.22042	0.274764	-0.0527845	0.247766	-0.121426	-0.296877	-0.312504	-0.0750136	0.105978	-0.283458	-0.138245	-0.166563	-0.195298	0.014019	-0.0612326	-0.036194
MEskyblue	-0.0330593	0.691479	0.468523	0.293809	-0.0885102	-0.0746955	0.0811528	-0.102471	0.278679	-0.0676725	-0.278663	-0.285317	-0.185636	-0.0625469	-0.280279	-0.214938	-0.122	-0.190811	0.00607615	-0.140786	-0.123352
MEthistle2	0.0292974	0.396635	0.415396	0.178798	-0.0723669	0.0252162	0.113858	-0.102733	0.194618	-0.0160313	-0.344911	-0.25552	-0.174519	0.0184695	-0.250792	-0.118408	-0.144683	-0.129418	0.0099001	-0.0924404	-0.052127
MEmagenta	0.0882502	0.0627169	0.317725	0.268046	-0.0659746	0.226555	-0.130525	-0.0875111	-0.0941324	0.0479273	-0.327363	-0.0893004	-0.220264	-0.203409	-0.208445	-0.0587898	-0.148749	0.0683612	-0.0182809	-0.00834119	-0.0363668
MEthistle1	0.00422445	0.597937	0.106805	0.0986024	-0.0417347	0.115636	-0.0660698	-0.0622741	0.149468	-0.0546227	-0.101528	-0.109586	-0.135859	-0.110382	-0.229856	-0.108115	-0.066112	-0.116475	-0.0233954	-0.0957337	-0.0589312
MEdarkgreen	-0.0685181	0.121747	0.0178364	-0.073346	-0.0408505	0.137576	0.0905935	-0.0874927	0.0699424	-0.0942171	-0.0463844	-0.116682	-0.0713421	0.0422561	-0.14692	0.144336	-0.106557	0.118881	0.0172567	-0.102803	0.0150442
MEgreenyellow	0.0391461	0.262733	0.258223	0.134684	-0.0675348	0.254441	-0.0317943	-0.134434	0.0477832	0.000753206	-0.312625	-0.162972	-0.214129	-0.127588	-0.274801	-0.00373762	-0.163317	-0.00755043	0.0155714	-0.0402372	0.0420396
MEred	-0.0449031	0.186887	-0.0498571	0.207497	-0.0749317	0.207316	-0.128798	0.0368968	-0.0221533	-0.0604356	-0.137885	0.108923	-0.0988527	0.00801825	-0.126231	-0.0322161	-0.128698	-0.107986	-0.0745958	0.090194	-0.00132087
MEorange	-0.0165622	0.0978933	-0.0517678	-0.132884	-0.0529897	0.24535	-0.0735685	0.0192743	0.00808562	0.158653	-0.152012	0.10775	0.0281203	-0.0655832	-0.0480603	0.203665	-0.0609342	-0.182276	-0.0524728	0.0824009	-0.0688414
MEsaddlebrown	0.137579	0.0490032	0.0880006	-0.145239	-0.0250986	0.0622879	-0.0512321	0.0467283	-0.017531	-0.0180007	-0.0603439	-0.0416565	0.0416617	-0.0552181	-0.0112318	0.0945867	-0.00309224	-0.133635	-0.0423185	-0.010745	-0.0614979
MEpink	0.154224	-0.0734637	0.0283029	-0.0505872	-0.0379463	0.0644796	-0.0834103	-0.00369895	-0.110024	0.0159812	-0.0842179	-0.024633	0.106842	-0.146805	-0.0981955	-0.106633	-0.00534832	0.0496366	-0.0551491	0.0233731	0.0523824
MEblack	0.0344663	0.12452	-0.217563	0.0860075	-0.110079	0.0115861	0.0678653	-0.165917	0.120147	0.0556995	-0.171302	-0.123285	0.0963492	0.164699	-0.0252848	-0.167501	0.0404293	-0.101395	0.0843973	0.0468872	0.0246715
MEblue	-0.00695547	-0.0734194	-0.240392	0.05331	-0.102222	0.229721	-0.22631	-0.20616	-0.208262	0.22549	-0.0525037	0.0311208	0.141505	-0.352543	-0.0279603	-0.29153	0.31187	0.0638388	-0.031031	0.215691	0.0429638
MEmediumpurple3	0.0117293	-0.0844055	-0.208332	-0.0569188	-0.0804004	0.219028	-0.130987	-0.188005	-0.198501	0.216506	0.0337397	0.0425149	0.0243477	-0.242216	-0.0440072	-0.275511	0.271194	-0.0256834	0.0889599	0.393171	0.241343
MEdarkred	-0.125387	-0.0454894	-0.187754	0.135522	-0.108533	0.343093	-0.188378	-0.10321	-0.205153	0.0464512	0.0434533	0.0681824	-0.141835	-0.241014	0.01781	-0.208161	-0.0107294	0.215919	-0.0342419	0.224102	0.0537337
MElightgreen	-0.172062	-0.0198395	-0.0585266	0.12002	-0.0642945	0.357378	-0.0823161	-0.0358034	-0.0218546	-0.106192	0.0462107	0.0351309	-0.133039	-0.0403677	-0.0940856	-0.082726	-0.0987015	0.137783	-0.0559135	-0.0415594	-0.065291
MEgrey60	-0.0736355	-0.0757269	-0.174505	-0.134873	-0.0627683	0.0433732	-0.0472706	-0.0207654	-0.168947	0.263893	-0.123677	0.0474212	-0.176343	-0.192961	0.122374	-0.122294	-0.0781107	0.188726	-0.0148265	0.409467	0.719989
MEsalmon	-0.129965	-0.0776818	-0.164645	-0.0396761	-0.0235219	0.0635047	-0.0772533	0.122236	-0.12463	-0.0226556	0.0962062	0.06912	-0.10492	-0.100164	0.114336	-0.106983	-0.0870888	0.39462	-0.02195	0.0660836	0.102819
MEbisque4	-0.1153	0.0289031	-0.194561	-0.0264966	-0.0776995	0.26824	-0.0764952	-0.133822	-0.0813272	0.0144916	-0.149054	0.124363	-0.0800718	-0.11567	0.0889333	-0.0520758	-0.082843	0.144878	0.0739237	0.0318596	0.104702
MEbrown4	0.0271492	-0.0813535	-0.136908	-0.240694	-0.0183257	-0.0352882	0.0755272	-0.108793	-0.0841958	0.387977	-0.186393	-0.103476	0.32266	-0.110675	-0.0555245	-0.167847	0.0151566	-0.161237	0.730106	0.0921711	0.40612
MElightyellow	-0.0702649	-0.147257	-0.144713	-0.27377	0.141962	-0.0381597	0.172543	-0.0534298	-0.0545326	0.0345679	0.0725231	-0.07957	0.332258	-0.0124995	-0.148592	-0.0759496	0.100378	0.126324	0.375687	-0.067863	0.122783
MEgrey	-0.0732565	-0.101799	-0.0428833	-0.108881	0.255981	-0.329057	0.435561	0.0344003	0.142799	-0.108028	0.263248	0.000947256	0.113542	0.453208	-0.160757	0.14024	0.160342	0.0642899	-0.0126497	-0.194612	-0.0883619

## Sheet: Supplemental Table 5
Supplemental Table 5. Top15 enrichment pathways by Metascape with genes in MEyellow module.
GroupID	Category	Term	Description	LogP	Log(q-value)	InTerm_InList	Genes	Symbols
1_Summary	Reactome Gene Sets	R-HSA-1640170	Cell Cycle	-100	-95.6537	143/692	332,641,672,675,699,701,890,891,898,983,990,991,993,995,1019,1029,1031,1058,1062,1063,1111,1763,2237,2305,2491,3014,3161,3619,3978,4001,4085,4171,4172,4173,4174,4175,4176,4605,4751,4998,5111,5347,5427,5557,5558,5888,5984,5985,6241,6502,6683,6790,7153,7157,7283,7443,7468,8318,8331,8340,8342,8348,8358,8970,9088,9133,9156,9212,9232,9493,9631,9700,9735,9793,9837,9918,10112,10403,10714,10733,10926,110…	BIRC5,BLM,BRCA1,BRCA2,BUB1,BUB1B,CCNA2,CCNB1,CCNE1,CDK1,CDC6,CDC20,CDC25A,CDC25C,CDK4,CDKN2A,CDKN2C,CENPA,CENPE,CENPF,CHEK1,DNA2,FEN1,FOXM1,CENPI,H2AX,HMMR,INCENP,LIG1,LMNB1,MAD2L1,MCM2,MCM3,MCM4,MCM5,MCM6,MCM7,MYBL2,NEK2,ORC1,PCNA,PLK1,POLE2,PRIM1,PRIM2,RAD51,RFC4,RFC5,RRM2,SKP2,SPAST,AURKA,TOP2A,TP53,TUBG1,VRK1,NSD2,CDC45,H2AC14,H2BC13,H2BC14,H2BC17,H3C2,H2BC11,PKMYT1,CCNB2,EXO1,AURKB,PTTG1,KIF…
1_Member	Reactome Gene Sets	R-HSA-1640170	Cell Cycle	-100	-95.6537	143/692	332,641,672,675,699,701,890,891,898,983,990,991,993,995,1019,1029,1031,1058,1062,1063,1111,1763,2237,2305,2491,3014,3161,3619,3978,4001,4085,4171,4172,4173,4174,4175,4176,4605,4751,4998,5111,5347,5427,5557,5558,5888,5984,5985,6241,6502,6683,6790,7153,7157,7283,7443,7468,8318,8331,8340,8342,8348,8358,8970,9088,9133,9156,9212,9232,9493,9631,9700,9735,9793,9837,9918,10112,10403,10714,10733,10926,110…	BIRC5,BLM,BRCA1,BRCA2,BUB1,BUB1B,CCNA2,CCNB1,CCNE1,CDK1,CDC6,CDC20,CDC25A,CDC25C,CDK4,CDKN2A,CDKN2C,CENPA,CENPE,CENPF,CHEK1,DNA2,FEN1,FOXM1,CENPI,H2AX,HMMR,INCENP,LIG1,LMNB1,MAD2L1,MCM2,MCM3,MCM4,MCM5,MCM6,MCM7,MYBL2,NEK2,ORC1,PCNA,PLK1,POLE2,PRIM1,PRIM2,RAD51,RFC4,RFC5,RRM2,SKP2,SPAST,AURKA,TOP2A,TP53,TUBG1,VRK1,NSD2,CDC45,H2AC14,H2BC13,H2BC14,H2BC17,H3C2,H2BC11,PKMYT1,CCNB2,EXO1,AURKB,PTTG1,KIF…
1_Member	Reactome Gene Sets	R-HSA-69278	Cell Cycle, Mitotic	-95.946	-91.9008	121/561	332,699,701,890,891,898,983,990,991,993,995,1019,1029,1031,1058,1062,1063,1763,2237,2305,2491,3014,3161,3619,3978,4001,4085,4171,4172,4173,4174,4175,4176,4605,4751,4998,5111,5347,5427,5557,5558,5984,5985,6241,6502,6683,6790,7153,7157,7283,7443,8318,8331,8340,8342,8348,8358,8970,9088,9133,9212,9232,9493,9631,9700,9735,9793,9837,9918,10112,10403,10714,10733,10926,11004,11065,11130,22974,23225,23310…	BIRC5,BUB1,BUB1B,CCNA2,CCNB1,CCNE1,CDK1,CDC6,CDC20,CDC25A,CDC25C,CDK4,CDKN2A,CDKN2C,CENPA,CENPE,CENPF,DNA2,FEN1,FOXM1,CENPI,H2AX,HMMR,INCENP,LIG1,LMNB1,MAD2L1,MCM2,MCM3,MCM4,MCM5,MCM6,MCM7,MYBL2,NEK2,ORC1,PCNA,PLK1,POLE2,PRIM1,PRIM2,RFC4,RFC5,RRM2,SKP2,SPAST,AURKA,TOP2A,TP53,TUBG1,VRK1,CDC45,H2AC14,H2BC13,H2BC14,H2BC17,H3C2,H2BC11,PKMYT1,CCNB2,AURKB,PTTG1,KIF23,NUP155,ESPL1,KNTC1,CKAP5,GINS1,NCAP…
1_Member	Reactome Gene Sets	R-HSA-69620	Cell Cycle Checkpoints	-75.2958	-71.4267	83/294	332,641,672,699,701,890,891,898,983,990,991,993,995,1029,1058,1062,1063,1111,1763,2491,3014,3619,4085,4171,4172,4173,4174,4175,4176,4998,5347,5984,5985,7157,7468,8318,8340,8342,8348,8970,9088,9133,9156,9212,9735,9793,10403,10926,11004,11065,11073,11130,11200,23594,51512,54821,54908,55143,55166,55388,55839,57082,57405,63967,64105,64946,79019,79172,79682,80010,81930,83540,83695,83990,84515,91687,11…	BIRC5,BLM,BRCA1,BUB1,BUB1B,CCNA2,CCNB1,CCNE1,CDK1,CDC6,CDC20,CDC25A,CDC25C,CDKN2A,CENPA,CENPE,CENPF,CHEK1,DNA2,CENPI,H2AX,INCENP,MAD2L1,MCM2,MCM3,MCM4,MCM5,MCM6,MCM7,ORC1,PLK1,RFC4,RFC5,TP53,NSD2,CDC45,H2BC13,H2BC14,H2BC17,H2BC11,PKMYT1,CCNB2,EXO1,AURKB,KNTC1,CKAP5,NDC80,DBF4,KIF2C,UBE2C,TOPBP1,ZWINT,CHEK2,ORC6,GTSE1,ERCC6L,SPDL1,CDCA8,CENPQ,MCM10,CENPN,KNL1,SPC25,CLSPN,CENPK,CENPH,CENPM,CENPO,CE…
1_Member	Reactome Gene Sets	R-HSA-68886	M Phase	-46.4761	-43.4086	70/418	332,699,701,891,983,991,1058,1062,1063,2491,3014,3619,4001,4085,4751,5347,6683,7283,7443,8331,8340,8342,8348,8358,8970,9133,9212,9232,9493,9631,9700,9735,9793,9918,10112,10403,10733,11004,11065,11130,23225,23310,23397,26271,54821,54892,54908,55143,55166,55706,55722,55839,57082,57405,64105,64151,64946,79019,79172,79682,81930,83540,91687,93323,113130,147841,151246,151648,220134,401541	BIRC5,BUB1,BUB1B,CCNB1,CDK1,CDC20,CENPA,CENPE,CENPF,CENPI,H2AX,INCENP,LMNB1,MAD2L1,NEK2,PLK1,SPAST,TUBG1,VRK1,H2AC14,H2BC13,H2BC14,H2BC17,H3C2,H2BC11,CCNB2,AURKB,PTTG1,KIF23,NUP155,ESPL1,KNTC1,CKAP5,NCAPD2,KIF20A,NDC80,PLK4,KIF2C,UBE2C,ZWINT,NUP210,NCAPD3,NCAPH,FBXO5,ERCC6L,NCAPG2,SPDL1,CDCA8,CENPQ,NDC1,CEP72,CENPN,KNL1,SPC25,CENPK,NCAPG,CENPH,CENPM,CENPO,CENPU,KIF18A,NUF2,CENPL,HAUS8,CDCA5,SPC24…
1_Member	Reactome Gene Sets	R-HSA-68877	Mitotic Prometaphase	-40.3677	-37.3639	49/204	332,699,701,891,983,991,1058,1062,1063,2491,3619,4085,4751,5347,7283,9133,9212,9735,9793,9918,10403,10733,11004,11130,23397,54821,54908,55143,55166,55722,55839,57082,57405,64105,64151,64946,79019,79172,79682,81930,83540,91687,93323,113130,147841,151246,151648,220134,401541	BIRC5,BUB1,BUB1B,CCNB1,CDK1,CDC20,CENPA,CENPE,CENPF,CENPI,INCENP,MAD2L1,NEK2,PLK1,TUBG1,CCNB2,AURKB,KNTC1,CKAP5,NCAPD2,NDC80,PLK4,KIF2C,ZWINT,NCAPH,ERCC6L,SPDL1,CDCA8,CENPQ,CEP72,CENPN,KNL1,SPC25,CENPK,NCAPG,CENPH,CENPM,CENPO,CENPU,KIF18A,NUF2,CENPL,HAUS8,CDCA5,SPC24,SGO2,SGO1,SKA1,CENPP
1_Member	Reactome Gene Sets	R-HSA-2500257	Resolution of Sister Chromatid Cohesion	-39.804	-36.8379	41/126	332,699,701,891,983,991,1058,1062,1063,2491,3619,4085,5347,9133,9212,9735,9793,10403,11004,11130,54821,54908,55143,55166,55839,57082,57405,64105,64946,79019,79172,79682,81930,83540,91687,113130,147841,151246,151648,220134,401541	BIRC5,BUB1,BUB1B,CCNB1,CDK1,CDC20,CENPA,CENPE,CENPF,CENPI,INCENP,MAD2L1,PLK1,CCNB2,AURKB,KNTC1,CKAP5,NDC80,KIF2C,ZWINT,ERCC6L,SPDL1,CDCA8,CENPQ,CENPN,KNL1,SPC25,CENPK,CENPH,CENPM,CENPO,CENPU,KIF18A,NUF2,CENPL,CDCA5,SPC24,SGO2,SGO1,SKA1,CENPP
1_Member	Reactome Gene Sets	R-HSA-141424	Amplification of signal from the kinetochores	-39.1594	-36.2282	37/96	332,699,701,991,1058,1062,1063,2491,3619,4085,5347,9212,9735,9793,10403,11004,11130,54821,54908,55143,55166,55839,57082,57405,64105,64946,79019,79172,79682,81930,83540,91687,147841,151246,151648,220134,401541	BIRC5,BUB1,BUB1B,CDC20,CENPA,CENPE,CENPF,CENPI,INCENP,MAD2L1,PLK1,AURKB,KNTC1,CKAP5,NDC80,KIF2C,ZWINT,ERCC6L,SPDL1,CDCA8,CENPQ,CENPN,KNL1,SPC25,CENPK,CENPH,CENPM,CENPO,CENPU,KIF18A,NUF2,CENPL,SPC24,SGO2,SGO1,SKA1,CENPP
1_Member	Reactome Gene Sets	R-HSA-141444	Amplification of signal from unattached kinetochores via a MAD2 inhibitory signal	-39.1594	-36.2282	37/96	332,699,701,991,1058,1062,1063,2491,3619,4085,5347,9212,9735,9793,10403,11004,11130,54821,54908,55143,55166,55839,57082,57405,64105,64946,79019,79172,79682,81930,83540,91687,147841,151246,151648,220134,401541	BIRC5,BUB1,BUB1B,CDC20,CENPA,CENPE,CENPF,CENPI,INCENP,MAD2L1,PLK1,AURKB,KNTC1,CKAP5,NDC80,KIF2C,ZWINT,ERCC6L,SPDL1,CDCA8,CENPQ,CENPN,KNL1,SPC25,CENPK,CENPH,CENPM,CENPO,CENPU,KIF18A,NUF2,CENPL,SPC24,SGO2,SGO1,SKA1,CENPP
1_Member	Reactome Gene Sets	R-HSA-2555396	Mitotic Metaphase and Anaphase	-38.2066	-35.3075	50/237	332,699,701,891,983,991,1058,1062,1063,2491,3619,4001,4085,5347,6683,7443,9133,9212,9232,9631,9700,9735,9793,10403,11004,11065,11130,26271,54821,54908,55143,55166,55706,55839,57082,57405,64105,64946,79019,79172,79682,81930,83540,91687,113130,147841,151246,151648,220134,401541	BIRC5,BUB1,BUB1B,CCNB1,CDK1,CDC20,CENPA,CENPE,CENPF,CENPI,INCENP,LMNB1,MAD2L1,PLK1,SPAST,VRK1,CCNB2,AURKB,PTTG1,NUP155,ESPL1,KNTC1,CKAP5,NDC80,KIF2C,UBE2C,ZWINT,FBXO5,ERCC6L,SPDL1,CDCA8,CENPQ,NDC1,CENPN,KNL1,SPC25,CENPK,CENPH,CENPM,CENPO,CENPU,KIF18A,NUF2,CENPL,CDCA5,SPC24,SGO2,SGO1,SKA1,CENPP
1_Member	Reactome Gene Sets	R-HSA-69618	Mitotic Spindle Checkpoint	-37.5371	-34.6533	38/113	332,699,701,991,1058,1062,1063,2491,3619,4085,5347,9212,9735,9793,10403,11004,11065,11130,54821,54908,55143,55166,55839,57082,57405,64105,64946,79019,79172,79682,81930,83540,91687,147841,151246,151648,220134,401541	BIRC5,BUB1,BUB1B,CDC20,CENPA,CENPE,CENPF,CENPI,INCENP,MAD2L1,PLK1,AURKB,KNTC1,CKAP5,NDC80,KIF2C,UBE2C,ZWINT,ERCC6L,SPDL1,CDCA8,CENPQ,CENPN,KNL1,SPC25,CENPK,CENPH,CENPM,CENPO,CENPU,KIF18A,NUF2,CENPL,SPC24,SGO2,SGO1,SKA1,CENPP
1_Member	Reactome Gene Sets	R-HSA-68882	Mitotic Anaphase	-37.0868	-34.2176	49/236	332,699,701,891,983,991,1058,1062,1063,2491,3619,4001,4085,5347,6683,7443,9133,9212,9232,9631,9700,9735,9793,10403,11004,11065,11130,54821,54908,55143,55166,55706,55839,57082,57405,64105,64946,79019,79172,79682,81930,83540,91687,113130,147841,151246,151648,220134,401541	BIRC5,BUB1,BUB1B,CCNB1,CDK1,CDC20,CENPA,CENPE,CENPF,CENPI,INCENP,LMNB1,MAD2L1,PLK1,SPAST,VRK1,CCNB2,AURKB,PTTG1,NUP155,ESPL1,KNTC1,CKAP5,NDC80,KIF2C,UBE2C,ZWINT,ERCC6L,SPDL1,CDCA8,CENPQ,NDC1,CENPN,KNL1,SPC25,CENPK,CENPH,CENPM,CENPO,CENPU,KIF18A,NUF2,CENPL,CDCA5,SPC24,SGO2,SGO1,SKA1,CENPP
1_Member	Reactome Gene Sets	R-HSA-9648025	EML4 and NUDC in mitotic spindle formation	-35.4163	-32.5886	37/117	332,699,701,991,1058,1062,1063,2491,3619,4085,5347,9212,9735,9793,10403,11004,11130,54821,54908,55143,55166,55839,57082,57405,64105,64946,79019,79172,79682,81930,83540,91687,147841,151246,151648,220134,401541	BIRC5,BUB1,BUB1B,CDC20,CENPA,CENPE,CENPF,CENPI,INCENP,MAD2L1,PLK1,AURKB,KNTC1,CKAP5,NDC80,KIF2C,ZWINT,ERCC6L,SPDL1,CDCA8,CENPQ,CENPN,KNL1,SPC25,CENPK,CENPH,CENPM,CENPO,CENPU,KIF18A,NUF2,CENPL,SPC24,SGO2,SGO1,SKA1,CENPP
1_Member	Reactome Gene Sets	R-HSA-5663220	RHO GTPases Activate Formins	-34.8951	-32.1399	39/140	332,699,701,991,1058,1062,1063,2491,3619,4085,5217,5347,9212,9735,9793,10403,11004,11130,54821,54908,55143,55166,55839,57082,57405,64105,64946,79019,79172,79682,81624,81930,83540,91687,147841,151246,151648,220134,401541	BIRC5,BUB1,BUB1B,CDC20,CENPA,CENPE,CENPF,CENPI,INCENP,MAD2L1,PFN2,PLK1,AURKB,KNTC1,CKAP5,NDC80,KIF2C,ZWINT,ERCC6L,SPDL1,CDCA8,CENPQ,CENPN,KNL1,SPC25,CENPK,CENPH,CENPM,CENPO,CENPU,DIAPH3,KIF18A,NUF2,CENPL,SPC24,SGO2,SGO1,SKA1,CENPP
1_Member	Reactome Gene Sets	R-HSA-194315	Signaling by Rho GTPases	-34.6466	-31.9024	61/455	2,29,332,699,701,991,995,1058,1062,1063,1894,2245,2491,3014,3619,4085,5217,5347,8331,8340,8342,8348,8358,8970,9055,9212,9735,9793,9824,9928,10403,11004,11113,11130,29127,54821,54908,55143,55166,55789,55839,57082,57405,64105,64946,79019,79172,79682,81624,81930,83540,84904,89839,91687,128239,128272,147841,151246,151648,220134,401541	A2M,ABR,BIRC5,BUB1,BUB1B,CDC20,CDC25C,CENPA,CENPE,CENPF,ECT2,FGD1,CENPI,H2AX,INCENP,MAD2L1,PFN2,PLK1,H2AC14,H2BC13,H2BC14,H2BC17,H3C2,H2BC11,PRC1,AURKB,KNTC1,CKAP5,ARHGAP11A,KIF14,NDC80,KIF2C,CIT,ZWINT,RACGAP1,ERCC6L,SPDL1,CDCA8,CENPQ,DEPDC1B,CENPN,KNL1,SPC25,CENPK,CENPH,CENPM,CENPO,CENPU,DIAPH3,KIF18A,NUF2,ARHGEF39,ARHGAP11B,CENPL,IQGAP3,ARHGEF19,SPC24,SGO2,SGO1,SKA1,CENPP
1_Member	Reactome Gene Sets	R-HSA-195258	RHO GTPase Effectors	-32.1842	-29.5282	51/327	332,699,701,991,995,1058,1062,1063,2491,3014,3619,4085,5217,5347,8331,8340,8342,8348,8358,8970,9055,9212,9735,9793,9928,10403,11004,11113,11130,54821,54908,55143,55166,55839,57082,57405,64105,64946,79019,79172,79682,81624,81930,83540,91687,128239,147841,151246,151648,220134,401541	BIRC5,BUB1,BUB1B,CDC20,CDC25C,CENPA,CENPE,CENPF,CENPI,H2AX,INCENP,MAD2L1,PFN2,PLK1,H2AC14,H2BC13,H2BC14,H2BC17,H3C2,H2BC11,PRC1,AURKB,KNTC1,CKAP5,KIF14,NDC80,KIF2C,CIT,ZWINT,ERCC6L,SPDL1,CDCA8,CENPQ,CENPN,KNL1,SPC25,CENPK,CENPH,CENPM,CENPO,CENPU,DIAPH3,KIF18A,NUF2,CENPL,IQGAP3,SPC24,SGO2,SGO1,SKA1,CENPP
1_Member	Reactome Gene Sets	R-HSA-2467813	Separation of Sister Chromatids	-31.6708	-29.0235	41/191	332,699,701,991,1058,1062,1063,2491,3619,4085,5347,9212,9232,9700,9735,9793,10403,11004,11065,11130,54821,54908,55143,55166,55839,57082,57405,64105,64946,79019,79172,79682,81930,83540,91687,113130,147841,151246,151648,220134,401541	BIRC5,BUB1,BUB1B,CDC20,CENPA,CENPE,CENPF,CENPI,INCENP,MAD2L1,PLK1,AURKB,PTTG1,ESPL1,KNTC1,CKAP5,NDC80,KIF2C,UBE2C,ZWINT,ERCC6L,SPDL1,CDCA8,CENPQ,CENPN,KNL1,SPC25,CENPK,CENPH,CENPM,CENPO,CENPU,KIF18A,NUF2,CENPL,CDCA5,SPC24,SGO2,SGO1,SKA1,CENPP
2_Summary	GO Biological Processes	GO:0007059	chromosome segregation	-72.5598	-68.8156	85/337	332,672,699,701,891,898,990,991,1062,1063,1843,1894,2177,2237,3619,3833,3835,4085,4288,4751,5347,6732,7153,7272,7283,7517,9055,9212,9232,9493,9700,9787,9918,9928,10403,10460,10615,11004,11065,11130,11339,23310,23397,24137,26271,29127,51203,54069,54892,54908,55143,55165,55166,55355,55706,55839,57082,57405,64105,64151,64793,64946,79075,80010,81610,81620,81930,83540,83903,83990,84722,90417,113130,11…	BIRC5,BRCA1,BUB1,BUB1B,CCNB1,CCNE1,CDC6,CDC20,CENPE,CENPF,DUSP1,ECT2,FANCD2,FEN1,INCENP,KIFC1,KIF22,MAD2L1,MKI67,NEK2,PLK1,SRPK1,TOP2A,TTK,TUBG1,XRCC3,PRC1,AURKB,PTTG1,KIF23,ESPL1,DLGAP5,NCAPD2,KIF14,NDC80,TACC3,SPAG5,KIF2C,UBE2C,ZWINT,OIP5,NCAPD3,NCAPH,KIF4A,FBXO5,RACGAP1,NUSAP1,MIS18A,NCAPG2,SPDL1,CDCA8,CEP55,CENPQ,HJURP,NDC1,CENPN,KNL1,SPC25,CENPK,NCAPG,CEP85,CENPH,DSCC1,RMI1,FAM83D,CDT1,KIF18…
2_Member	GO Biological Processes	GO:0007059	chromosome segregation	-72.5598	-68.8156	85/337	332,672,699,701,891,898,990,991,1062,1063,1843,1894,2177,2237,3619,3833,3835,4085,4288,4751,5347,6732,7153,7272,7283,7517,9055,9212,9232,9493,9700,9787,9918,9928,10403,10460,10615,11004,11065,11130,11339,23310,23397,24137,26271,29127,51203,54069,54892,54908,55143,55165,55166,55355,55706,55839,57082,57405,64105,64151,64793,64946,79075,80010,81610,81620,81930,83540,83903,83990,84722,90417,113130,11…	BIRC5,BRCA1,BUB1,BUB1B,CCNB1,CCNE1,CDC6,CDC20,CENPE,CENPF,DUSP1,ECT2,FANCD2,FEN1,INCENP,KIFC1,KIF22,MAD2L1,MKI67,NEK2,PLK1,SRPK1,TOP2A,TTK,TUBG1,XRCC3,PRC1,AURKB,PTTG1,KIF23,ESPL1,DLGAP5,NCAPD2,KIF14,NDC80,TACC3,SPAG5,KIF2C,UBE2C,ZWINT,OIP5,NCAPD3,NCAPH,KIF4A,FBXO5,RACGAP1,NUSAP1,MIS18A,NCAPG2,SPDL1,CDCA8,CEP55,CENPQ,HJURP,NDC1,CENPN,KNL1,SPC25,CENPK,NCAPG,CEP85,CENPH,DSCC1,RMI1,FAM83D,CDT1,KIF18…
2_Member	GO Biological Processes	GO:0051301	cell division	-71.3488	-67.7016	104/603	332,641,675,699,701,890,891,898,899,983,990,991,993,995,1019,1058,1062,1063,1164,1894,3070,3619,3832,3833,3978,4085,4192,4751,4851,5080,5347,6683,6790,7153,7443,8914,9055,9133,9212,9232,9493,9700,9735,9793,9918,9928,10112,10403,10460,10615,10733,11004,11065,11113,11130,11200,11339,22974,23310,23397,23594,24137,26271,26586,29127,29899,29901,51203,54069,54443,54478,54821,54892,54908,55143,55165,570…	BIRC5,BLM,BRCA2,BUB1,BUB1B,CCNA2,CCNB1,CCNE1,CCNF,CDK1,CDC6,CDC20,CDC25A,CDC25C,CDK4,CENPA,CENPE,CENPF,CKS2,ECT2,HELLS,INCENP,KIF11,KIFC1,LIG1,MAD2L1,MDK,NEK2,NOTCH1,PAX6,PLK1,SPAST,AURKA,TOP2A,VRK1,TIMELESS,PRC1,CCNB2,AURKB,PTTG1,KIF23,ESPL1,KNTC1,CKAP5,NCAPD2,KIF14,KIF20A,NDC80,TACC3,SPAG5,PLK4,KIF2C,UBE2C,CIT,ZWINT,CHEK2,OIP5,TPX2,NCAPD3,NCAPH,ORC6,KIF4A,FBXO5,CKAP2,RACGAP1,GPSM2,SAC3D1,NUSAP1…
2_Member	GO Biological Processes	GO:0000280	nuclear division	-68.572	-65.0039	89/423	332,675,699,701,891,898,990,991,995,1062,1063,1111,1164,1843,2175,2177,3619,3832,3833,3835,4085,4288,4605,4751,5347,5888,6683,6790,7153,7272,7283,7517,8438,9055,9088,9212,9232,9493,9700,9735,9787,9918,9928,10403,10460,10615,11004,11022,11065,11130,11200,22974,23310,23397,24137,25788,26271,27085,29127,51203,54443,54892,54908,55143,55165,55706,63979,64105,64151,64793,79075,79866,80010,81620,81930,8…	BIRC5,BRCA2,BUB1,BUB1B,CCNB1,CCNE1,CDC6,CDC20,CDC25C,CENPE,CENPF,CHEK1,CKS2,DUSP1,FANCA,FANCD2,INCENP,KIF11,KIFC1,KIF22,MAD2L1,MKI67,MYBL2,NEK2,PLK1,RAD51,SPAST,AURKA,TOP2A,TTK,TUBG1,XRCC3,RAD54L,PRC1,PKMYT1,AURKB,PTTG1,KIF23,ESPL1,KNTC1,DLGAP5,NCAPD2,KIF14,NDC80,TACC3,SPAG5,KIF2C,TDRKH,UBE2C,ZWINT,CHEK2,TPX2,NCAPD3,NCAPH,KIF4A,RAD54B,FBXO5,MTBP,RACGAP1,NUSAP1,ANLN,NCAPG2,SPDL1,CDCA8,CEP55,NDC1,F…
2_Member	GO Biological Processes	GO:0048285	organelle fission	-66.6528	-63.1739	91/471	332,675,699,701,891,898,990,991,995,1062,1063,1111,1164,1843,2175,2177,3619,3832,3833,3835,4085,4288,4605,4751,5347,5888,6683,6790,7153,7272,7283,7517,8438,9055,9088,9212,9232,9493,9700,9735,9787,9918,9928,10403,10460,10615,11004,11022,11065,11130,11200,22974,23310,23397,24137,25788,26271,27085,29127,51203,54443,54892,54908,55143,55165,55706,63979,64105,64151,64793,79075,79866,80010,80179,81620,8…	BIRC5,BRCA2,BUB1,BUB1B,CCNB1,CCNE1,CDC6,CDC20,CDC25C,CENPE,CENPF,CHEK1,CKS2,DUSP1,FANCA,FANCD2,INCENP,KIF11,KIFC1,KIF22,MAD2L1,MKI67,MYBL2,NEK2,PLK1,RAD51,SPAST,AURKA,TOP2A,TTK,TUBG1,XRCC3,RAD54L,PRC1,PKMYT1,AURKB,PTTG1,KIF23,ESPL1,KNTC1,DLGAP5,NCAPD2,KIF14,NDC80,TACC3,SPAG5,KIF2C,TDRKH,UBE2C,ZWINT,CHEK2,TPX2,NCAPD3,NCAPH,KIF4A,RAD54B,FBXO5,MTBP,RACGAP1,NUSAP1,ANLN,NCAPG2,SPDL1,CDCA8,CEP55,NDC1,F…
2_Member	GO Biological Processes	GO:0098813	nuclear chromosome segregation	-61.1308	-57.7388	71/275	699,701,891,898,990,991,1062,1063,1843,1894,2177,2237,3619,3833,3835,4085,4751,5347,7153,7272,7283,7517,9055,9212,9232,9493,9700,9787,9918,9928,10403,10460,10615,11004,11065,11130,23310,23397,24137,26271,29127,51203,54892,54908,55143,55165,55166,55706,57082,64105,64151,79075,80010,81610,81620,81930,83540,83903,83990,84722,90417,113130,116028,146909,146956,151246,151648,157570,256126,348654,440081	BUB1,BUB1B,CCNB1,CCNE1,CDC6,CDC20,CENPE,CENPF,DUSP1,ECT2,FANCD2,FEN1,INCENP,KIFC1,KIF22,MAD2L1,NEK2,PLK1,TOP2A,TTK,TUBG1,XRCC3,PRC1,AURKB,PTTG1,KIF23,ESPL1,DLGAP5,NCAPD2,KIF14,NDC80,TACC3,SPAG5,KIF2C,UBE2C,ZWINT,NCAPD3,NCAPH,KIF4A,FBXO5,RACGAP1,NUSAP1,NCAPG2,SPDL1,CDCA8,CEP55,CENPQ,NDC1,KNL1,CENPK,NCAPG,DSCC1,RMI1,FAM83D,CDT1,KIF18A,NUF2,HASPIN,BRIP1,PSRC1,KNSTRN,CDCA5,RMI2,KIF18B,EME1,SGO2,SGO1,…
2_Member	GO Biological Processes	GO:0140014	mitotic nuclear division	-60.4034	-57.0572	71/281	332,699,701,891,990,991,995,1062,1063,1111,1843,3619,3832,3833,3835,4085,4288,4605,4751,5347,6683,6790,7272,7283,7517,9055,9088,9212,9232,9493,9700,9735,9787,9918,9928,10403,10460,10615,11004,11065,11130,11200,22974,23310,23397,24137,26271,27085,29127,51203,54443,54892,54908,55143,55165,64105,64151,64793,79075,79866,81620,81930,83540,83903,84722,90417,113130,146909,151246,151648,348654	BIRC5,BUB1,BUB1B,CCNB1,CDC6,CDC20,CDC25C,CENPE,CENPF,CHEK1,DUSP1,INCENP,KIF11,KIFC1,KIF22,MAD2L1,MKI67,MYBL2,NEK2,PLK1,SPAST,AURKA,TTK,TUBG1,XRCC3,PRC1,PKMYT1,AURKB,PTTG1,KIF23,ESPL1,KNTC1,DLGAP5,NCAPD2,KIF14,NDC80,TACC3,SPAG5,KIF2C,UBE2C,ZWINT,CHEK2,TPX2,NCAPD3,NCAPH,KIF4A,FBXO5,MTBP,RACGAP1,NUSAP1,ANLN,NCAPG2,SPDL1,CDCA8,CEP55,CENPK,NCAPG,CEP85,DSCC1,BORA,CDT1,KIF18A,NUF2,HASPIN,PSRC1,KNSTRN,CD…
2_Member	GO Biological Processes	GO:0000819	sister chromatid segregation	-56.0344	-52.802	60/199	699,701,891,990,991,1062,1063,1843,2237,3619,3833,3835,4085,4751,5347,7153,7272,7283,7517,9055,9212,9232,9493,9700,9787,9918,9928,10403,10460,10615,11004,11065,11130,23310,23397,24137,26271,29127,51203,54892,54908,55143,55165,64105,64151,79075,81620,81930,83540,83903,84722,90417,113130,116028,146909,151246,151648,157570,348654,440081	BUB1,BUB1B,CCNB1,CDC6,CDC20,CENPE,CENPF,DUSP1,FEN1,INCENP,KIFC1,KIF22,MAD2L1,NEK2,PLK1,TOP2A,TTK,TUBG1,XRCC3,PRC1,AURKB,PTTG1,KIF23,ESPL1,DLGAP5,NCAPD2,KIF14,NDC80,TACC3,SPAG5,KIF2C,UBE2C,ZWINT,NCAPD3,NCAPH,KIF4A,FBXO5,RACGAP1,NUSAP1,NCAPG2,SPDL1,CDCA8,CEP55,CENPK,NCAPG,DSCC1,CDT1,KIF18A,NUF2,HASPIN,PSRC1,KNSTRN,CDCA5,RMI2,KIF18B,SGO2,SGO1,ESCO2,GEN1,DDX12P
2_Member	GO Biological Processes	GO:0000070	mitotic sister chromatid segregation	-54.2507	-51.0506	55/164	699,701,891,990,991,1062,1063,1843,3619,3833,3835,4085,4751,5347,7272,7283,7517,9055,9212,9232,9493,9700,9787,9918,9928,10403,10460,10615,11004,11065,11130,23310,23397,24137,26271,29127,51203,54892,54908,55143,55165,64105,64151,79075,81620,81930,83540,83903,84722,90417,113130,146909,151246,151648,348654	BUB1,BUB1B,CCNB1,CDC6,CDC20,CENPE,CENPF,DUSP1,INCENP,KIFC1,KIF22,MAD2L1,NEK2,PLK1,TTK,TUBG1,XRCC3,PRC1,AURKB,PTTG1,KIF23,ESPL1,DLGAP5,NCAPD2,KIF14,NDC80,TACC3,SPAG5,KIF2C,UBE2C,ZWINT,NCAPD3,NCAPH,KIF4A,FBXO5,RACGAP1,NUSAP1,NCAPG2,SPDL1,CDCA8,CEP55,CENPK,NCAPG,DSCC1,CDT1,KIF18A,NUF2,HASPIN,PSRC1,KNSTRN,CDCA5,KIF18B,SGO2,SGO1,GEN1
2_Member	GO Biological Processes	GO:0051310	metaphase plate congression	-20.694	-18.3478	21/64	891,1062,1063,3619,3833,3835,9212,9928,10403,10615,11004,54908,55143,55165,55166,81610,81620,81930,83540,84722,113130	CCNB1,CENPE,CENPF,INCENP,KIFC1,KIF22,AURKB,KIF14,NDC80,SPAG5,KIF2C,SPDL1,CDCA8,CEP55,CENPQ,FAM83D,CDT1,KIF18A,NUF2,PSRC1,CDCA5
2_Member	GO Biological Processes	GO:0050000	chromosome localization	-19.4939	-17.1969	22/82	891,1062,1063,3619,3833,3835,9212,9787,9928,10403,10615,11004,54908,55143,55165,55166,81610,81620,81930,83540,84722,113130	CCNB1,CENPE,CENPF,INCENP,KIFC1,KIF22,AURKB,DLGAP5,KIF14,NDC80,SPAG5,KIF2C,SPDL1,CDCA8,CEP55,CENPQ,FAM83D,CDT1,KIF18A,NUF2,PSRC1,CDCA5
2_Member	GO Biological Processes	GO:0051303	establishment of chromosome localization	-19.4939	-17.1969	22/82	891,1062,1063,3619,3833,3835,9212,9787,9928,10403,10615,11004,54908,55143,55165,55166,81610,81620,81930,83540,84722,113130	CCNB1,CENPE,CENPF,INCENP,KIFC1,KIF22,AURKB,DLGAP5,KIF14,NDC80,SPAG5,KIF2C,SPDL1,CDCA8,CEP55,CENPQ,FAM83D,CDT1,KIF18A,NUF2,PSRC1,CDCA5
2_Member	GO Biological Processes	GO:0007080	mitotic metaphase plate congression	-15.7051	-13.5379	16/50	891,1062,3833,3835,9212,9928,10403,11004,54908,55143,55165,81620,81930,83540,84722,113130	CCNB1,CENPE,KIFC1,KIF22,AURKB,KIF14,NDC80,KIF2C,SPDL1,CDCA8,CEP55,CDT1,KIF18A,NUF2,PSRC1,CDCA5
2_Member	GO Biological Processes	GO:0051640	organelle localization	-14.0405	-11.9272	48/738	891,983,1058,1062,1063,3619,3833,3835,4085,4139,4751,5080,5217,5347,6683,6790,7283,8541,9212,9493,9700,9787,9793,9928,10403,10615,10733,11004,26115,29899,51203,54908,55143,55165,55166,55722,80179,81610,81620,81930,83540,84722,89958,92558,93323,113130,259266,347240	CCNB1,CDK1,CENPA,CENPE,CENPF,INCENP,KIFC1,KIF22,MAD2L1,MARK1,NEK2,PAX6,PFN2,PLK1,SPAST,AURKA,TUBG1,PPFIA3,AURKB,KIF23,ESPL1,DLGAP5,CKAP5,KIF14,NDC80,SPAG5,PLK4,KIF2C,TANC2,GPSM2,NUSAP1,SPDL1,CDCA8,CEP55,CENPQ,CEP72,MYO19,FAM83D,CDT1,KIF18A,NUF2,PSRC1,SAPCD2,BICDL1,HAUS8,CDCA5,ASPM,KIF24
2_Member	GO Biological Processes	GO:0051656	establishment of organelle localization	-12.2049	-10.1746	38/541	891,1058,1062,1063,3619,3833,3835,4085,4139,5080,5217,5347,6683,8541,9212,9493,9700,9787,9928,10403,10615,11004,26115,29899,51203,54908,55143,55165,55166,80179,81610,81620,81930,83540,84722,89958,92558,113130	CCNB1,CENPA,CENPE,CENPF,INCENP,KIFC1,KIF22,MAD2L1,MARK1,PAX6,PFN2,PLK1,SPAST,PPFIA3,AURKB,KIF23,ESPL1,DLGAP5,KIF14,NDC80,SPAG5,KIF2C,TANC2,GPSM2,NUSAP1,SPDL1,CDCA8,CEP55,CENPQ,MYO19,FAM83D,CDT1,KIF18A,NUF2,PSRC1,SAPCD2,BICDL1,CDCA5
3_Summary	GO Biological Processes	GO:0006260	DNA replication	-66.6171	-63.1739	75/275	641,672,675,890,898,983,990,1111,1763,2237,3978,4171,4172,4173,4174,4175,4176,4796,4998,5111,5427,5557,5558,5888,5984,5985,6240,6241,7157,8208,8318,8914,9156,9401,9768,9837,10036,10189,10535,10714,10721,10919,10926,11073,11169,11200,23594,23649,26271,27101,51053,51514,51659,55159,55388,63967,64785,79075,79733,79915,80010,80119,81620,83695,83990,84296,84515,90381,116028,144455,146956,157570,253714…	BLM,BRCA1,BRCA2,CCNA2,CCNE1,CDK1,CDC6,CHEK1,DNA2,FEN1,LIG1,MCM2,MCM3,MCM4,MCM5,MCM6,MCM7,TONSL,ORC1,PCNA,POLE2,PRIM1,PRIM2,RAD51,RFC4,RFC5,RRM1,RRM2,TP53,CHAF1B,CDC45,TIMELESS,EXO1,RECQL4,PCLAF,GINS1,CHAF1A,ALYREF,RNASEH2A,POLD3,POLQ,EHMT2,DBF4,TOPBP1,WDHD1,CHEK2,ORC6,POLA2,FBXO5,CACYBP,GMNN,DTL,GINS2,RFWD3,MCM10,CLSPN,GINS3,DSCC1,E2F8,ATAD5,RMI1,PIF1,CDT1,RHNO1,BRIP1,GINS4,MCM8,TICRR,RMI2,E2F7,E…
3_Member	GO Biological Processes	GO:0006260	DNA replication	-66.6171	-63.1739	75/275	641,672,675,890,898,983,990,1111,1763,2237,3978,4171,4172,4173,4174,4175,4176,4796,4998,5111,5427,5557,5558,5888,5984,5985,6240,6241,7157,8208,8318,8914,9156,9401,9768,9837,10036,10189,10535,10714,10721,10919,10926,11073,11169,11200,23594,23649,26271,27101,51053,51514,51659,55159,55388,63967,64785,79075,79733,79915,80010,80119,81620,83695,83990,84296,84515,90381,116028,144455,146956,157570,253714…	BLM,BRCA1,BRCA2,CCNA2,CCNE1,CDK1,CDC6,CHEK1,DNA2,FEN1,LIG1,MCM2,MCM3,MCM4,MCM5,MCM6,MCM7,TONSL,ORC1,PCNA,POLE2,PRIM1,PRIM2,RAD51,RFC4,RFC5,RRM1,RRM2,TP53,CHAF1B,CDC45,TIMELESS,EXO1,RECQL4,PCLAF,GINS1,CHAF1A,ALYREF,RNASEH2A,POLD3,POLQ,EHMT2,DBF4,TOPBP1,WDHD1,CHEK2,ORC6,POLA2,FBXO5,CACYBP,GMNN,DTL,GINS2,RFWD3,MCM10,CLSPN,GINS3,DSCC1,E2F8,ATAD5,RMI1,PIF1,CDT1,RHNO1,BRIP1,GINS4,MCM8,TICRR,RMI2,E2F7,E…
3_Member	GO Biological Processes	GO:0006261	DNA-dependent DNA replication	-51.4551	-48.2849	52/154	641,675,898,990,1763,2237,3978,4171,4172,4173,4174,4175,4176,4796,4998,5111,5427,5557,5558,5888,5984,5985,8318,8914,9401,9837,10189,10535,10714,10721,10926,11073,11169,11200,23594,23649,26271,51053,51659,55159,55388,64785,79075,79733,79915,81620,84296,90381,144455,146956,253714,348654	BLM,BRCA2,CCNE1,CDC6,DNA2,FEN1,LIG1,MCM2,MCM3,MCM4,MCM5,MCM6,MCM7,TONSL,ORC1,PCNA,POLE2,PRIM1,PRIM2,RAD51,RFC4,RFC5,CDC45,TIMELESS,RECQL4,GINS1,ALYREF,RNASEH2A,POLD3,POLQ,DBF4,TOPBP1,WDHD1,CHEK2,ORC6,POLA2,FBXO5,GMNN,GINS2,RFWD3,MCM10,GINS3,DSCC1,E2F8,ATAD5,CDT1,GINS4,TICRR,E2F7,EME1,MMS22L,GEN1
3_Member	KEGG Pathway	hsa04110	Cell cycle	-34.6113	-31.8779	38/132	699,701,890,891,898,983,990,991,993,995,1019,1029,1031,1111,3066,4085,4171,4172,4173,4174,4175,4176,4998,5111,5347,5591,6502,7157,7272,8318,9088,9133,9232,9700,10926,11200,23594,195828	BUB1,BUB1B,CCNA2,CCNB1,CCNE1,CDK1,CDC6,CDC20,CDC25A,CDC25C,CDK4,CDKN2A,CDKN2C,CHEK1,HDAC2,MAD2L1,MCM2,MCM3,MCM4,MCM5,MCM6,MCM7,ORC1,PCNA,PLK1,PRKDC,SKP2,TP53,TTK,CDC45,PKMYT1,CCNB2,PTTG1,ESPL1,DBF4,CHEK2,ORC6,ZNF367
3_Member	KEGG Pathway	ko04110	Cell cycle	-34.3552	-31.6322	37/124	699,701,890,891,898,983,990,991,993,995,1019,1029,1031,1111,3066,4085,4171,4172,4173,4174,4175,4176,4998,5111,5347,5591,6502,7157,7272,8318,9088,9133,9232,9700,10926,11200,23594	BUB1,BUB1B,CCNA2,CCNB1,CCNE1,CDK1,CDC6,CDC20,CDC25A,CDC25C,CDK4,CDKN2A,CDKN2C,CHEK1,HDAC2,MAD2L1,MCM2,MCM3,MCM4,MCM5,MCM6,MCM7,ORC1,PCNA,PLK1,PRKDC,SKP2,TP53,TTK,CDC45,PKMYT1,CCNB2,PTTG1,ESPL1,DBF4,CHEK2,ORC6
3_Member	GO Biological Processes	GO:0044786	cell cycle DNA replication	-32.8144	-30.1402	29/66	675,1763,2237,3978,4171,4172,4173,4174,4175,4176,5111,5427,5557,5558,5888,5984,5985,8318,9837,10714,10926,11200,23649,26271,51053,79733,79915,81620,144455	BRCA2,DNA2,FEN1,LIG1,MCM2,MCM3,MCM4,MCM5,MCM6,MCM7,PCNA,POLE2,PRIM1,PRIM2,RAD51,RFC4,RFC5,CDC45,GINS1,POLD3,DBF4,CHEK2,POLA2,FBXO5,GMNN,E2F8,ATAD5,CDT1,E2F7
3_Member	Reactome Gene Sets	R-HSA-69190	DNA strand elongation	-31.037	-28.415	22/32	1763,2237,3978,4171,4172,4173,4174,4175,4176,5111,5557,5558,5984,5985,8318,9837,10714,23649,51659,64785,84296,84515	DNA2,FEN1,LIG1,MCM2,MCM3,MCM4,MCM5,MCM6,MCM7,PCNA,PRIM1,PRIM2,RFC4,RFC5,CDC45,GINS1,POLD3,POLA2,GINS2,GINS3,GINS4,MCM8
3_Member	GO Biological Processes	GO:0044843	cell cycle G1/S phase transition	-30.1437	-27.5378	48/310	890,891,898,983,990,993,995,1019,1029,1031,1033,2146,4171,4172,4173,4174,4175,4176,4998,5111,5427,5471,5557,5558,5591,6241,6502,6659,6790,7157,8318,9928,10926,11200,23594,23649,26271,27085,51053,51512,55159,55388,79733,81610,81620,84515,128239,144455	CCNA2,CCNB1,CCNE1,CDK1,CDC6,CDC25A,CDC25C,CDK4,CDKN2A,CDKN2C,CDKN3,EZH2,MCM2,MCM3,MCM4,MCM5,MCM6,MCM7,ORC1,PCNA,POLE2,PPAT,PRIM1,PRIM2,PRKDC,RRM2,SKP2,SOX4,AURKA,TP53,CDC45,KIF14,DBF4,CHEK2,ORC6,POLA2,FBXO5,MTBP,GMNN,GTSE1,RFWD3,MCM10,E2F8,FAM83D,CDT1,MCM8,IQGAP3,E2F7
3_Member	Reactome Gene Sets	R-HSA-69306	DNA Replication	-29.6883	-27.1054	34/128	890,898,990,1763,2237,3978,4171,4172,4173,4174,4175,4176,4998,5111,5427,5557,5558,5984,5985,6502,8318,9837,10714,10926,11065,23594,23649,51053,51659,55388,64785,81620,84296,84515	CCNA2,CCNE1,CDC6,DNA2,FEN1,LIG1,MCM2,MCM3,MCM4,MCM5,MCM6,MCM7,ORC1,PCNA,POLE2,PRIM1,PRIM2,RFC4,RFC5,SKP2,CDC45,GINS1,POLD3,DBF4,UBE2C,ORC6,POLA2,GMNN,GINS2,MCM10,GINS3,CDT1,GINS4,MCM8
3_Member	GO Biological Processes	GO:0000082	G1/S transition of mitotic cell cycle	-29.5715	-26.9961	46/287	891,898,983,990,993,995,1019,1029,1031,1033,2146,4171,4172,4173,4174,4175,4176,4998,5111,5427,5471,5557,5558,5591,6241,6502,6659,6790,7157,8318,9928,10926,11200,23594,23649,26271,27085,51053,51512,55159,55388,79733,81620,84515,128239,144455	CCNB1,CCNE1,CDK1,CDC6,CDC25A,CDC25C,CDK4,CDKN2A,CDKN2C,CDKN3,EZH2,MCM2,MCM3,MCM4,MCM5,MCM6,MCM7,ORC1,PCNA,POLE2,PPAT,PRIM1,PRIM2,PRKDC,RRM2,SKP2,SOX4,AURKA,TP53,CDC45,KIF14,DBF4,CHEK2,ORC6,POLA2,FBXO5,MTBP,GMNN,GTSE1,RFWD3,MCM10,E2F8,CDT1,MCM8,IQGAP3,E2F7
3_Member	GO Biological Processes	GO:0033260	nuclear DNA replication	-29.0338	-26.5071	26/61	675,1763,2237,3978,4171,4172,4173,4174,4175,4176,5111,5427,5557,5558,5888,5984,5985,8318,9837,10714,10926,11200,23649,51053,79915,81620	BRCA2,DNA2,FEN1,LIG1,MCM2,MCM3,MCM4,MCM5,MCM6,MCM7,PCNA,POLE2,PRIM1,PRIM2,RAD51,RFC4,RFC5,CDC45,GINS1,POLD3,DBF4,CHEK2,POLA2,GMNN,ATAD5,CDT1
3_Member	Reactome Gene Sets	R-HSA-69242	S Phase	-28.4144	-25.9006	36/162	890,898,990,993,1019,1763,2237,3978,4171,4172,4173,4174,4175,4176,4998,5111,5427,5557,5558,5984,5985,6502,8318,9837,10714,11065,23594,23649,51659,64785,81620,84296,84515,113130,157570,286826	CCNA2,CCNE1,CDC6,CDC25A,CDK4,DNA2,FEN1,LIG1,MCM2,MCM3,MCM4,MCM5,MCM6,MCM7,ORC1,PCNA,POLE2,PRIM1,PRIM2,RFC4,RFC5,SKP2,CDC45,GINS1,POLD3,UBE2C,ORC6,POLA2,GINS2,GINS3,CDT1,GINS4,MCM8,CDCA5,ESCO2,LIN9
3_Member	Reactome Gene Sets	R-HSA-453279	Mitotic G1 phase and G1/S transition	-27.2707	-24.7936	34/149	890,891,898,983,990,993,1019,1029,1031,4171,4172,4173,4174,4175,4176,4605,4998,5111,5427,5557,5558,6241,6502,7153,8318,10926,23594,23649,26271,51053,55388,81620,84515,286826	CCNA2,CCNB1,CCNE1,CDK1,CDC6,CDC25A,CDK4,CDKN2A,CDKN2C,MCM2,MCM3,MCM4,MCM5,MCM6,MCM7,MYBL2,ORC1,PCNA,POLE2,PRIM1,PRIM2,RRM2,SKP2,TOP2A,CDC45,DBF4,ORC6,POLA2,FBXO5,GMNN,MCM10,CDT1,MCM8,LIN9
3_Member	Reactome Gene Sets	R-HSA-69239	Synthesis of DNA	-26.6966	-24.2368	31/120	890,898,990,1763,2237,3978,4171,4172,4173,4174,4175,4176,4998,5111,5427,5557,5558,5984,5985,6502,8318,9837,10714,11065,23594,23649,51659,64785,81620,84296,84515	CCNA2,CCNE1,CDC6,DNA2,FEN1,LIG1,MCM2,MCM3,MCM4,MCM5,MCM6,MCM7,ORC1,PCNA,POLE2,PRIM1,PRIM2,RFC4,RFC5,SKP2,CDC45,GINS1,POLD3,UBE2C,ORC6,POLA2,GINS2,GINS3,CDT1,GINS4,MCM8
3_Member	Reactome Gene Sets	R-HSA-68962	Activation of the pre-replicative complex	-24.6487	-22.2055	19/33	990,4171,4172,4173,4174,4175,4176,4998,5427,5557,5558,8318,10926,23594,23649,51053,55388,81620,84515	CDC6,MCM2,MCM3,MCM4,MCM5,MCM6,MCM7,ORC1,POLE2,PRIM1,PRIM2,CDC45,DBF4,ORC6,POLA2,GMNN,MCM10,CDT1,MCM8
3_Member	Reactome Gene Sets	R-HSA-69206	G1/S Transition	-24.1644	-21.7424	30/131	890,891,898,983,990,993,1019,4171,4172,4173,4174,4175,4176,4998,5111,5427,5557,5558,6241,6502,8318,10926,23594,23649,26271,51053,55388,81620,84515,286826	CCNA2,CCNB1,CCNE1,CDK1,CDC6,CDC25A,CDK4,MCM2,MCM3,MCM4,MCM5,MCM6,MCM7,ORC1,PCNA,POLE2,PRIM1,PRIM2,RRM2,SKP2,CDC45,DBF4,ORC6,POLA2,FBXO5,GMNN,MCM10,CDT1,MCM8,LIN9
3_Member	Reactome Gene Sets	R-HSA-176187	Activation of ATR in response to replication stress	-23.3428	-20.9361	19/37	990,993,995,1111,4171,4172,4173,4174,4175,4176,4998,5984,5985,8318,10926,23594,55388,63967,84515	CDC6,CDC25A,CDC25C,CHEK1,MCM2,MCM3,MCM4,MCM5,MCM6,MCM7,ORC1,RFC4,RFC5,CDC45,DBF4,ORC6,MCM10,CLSPN,MCM8
3_Member	GO Biological Processes	GO:0006270	DNA replication initiation	-22.7659	-20.3881	19/39	898,990,4171,4172,4173,4174,4175,4176,4998,5427,5557,5558,8318,11073,23594,23649,55388,81620,90381	CCNE1,CDC6,MCM2,MCM3,MCM4,MCM5,MCM6,MCM7,ORC1,POLE2,PRIM1,PRIM2,CDC45,TOPBP1,ORC6,POLA2,MCM10,CDT1,TICRR
3_Member	KEGG Pathway	ko03030	DNA replication	-21.863	-19.5035	18/36	1763,2237,3978,4171,4172,4173,4174,4175,4176,5111,5427,5557,5558,5984,5985,10535,10714,23649	DNA2,FEN1,LIG1,MCM2,MCM3,MCM4,MCM5,MCM6,MCM7,PCNA,POLE2,PRIM1,PRIM2,RFC4,RFC5,RNASEH2A,POLD3,POLA2
3_Member	KEGG Pathway	hsa03030	DNA replication	-20.3146	-17.9853	18/42	1763,2237,3978,4171,4172,4173,4174,4175,4176,5111,5427,5557,5558,5984,5985,10535,10714,23649	DNA2,FEN1,LIG1,MCM2,MCM3,MCM4,MCM5,MCM6,MCM7,PCNA,POLE2,PRIM1,PRIM2,RFC4,RFC5,RNASEH2A,POLD3,POLA2
3_Member	GO Biological Processes	GO:0006271	DNA strand elongation involved in DNA replication	-19.1773	-16.8955	14/22	1763,2237,3978,4172,4173,4176,5111,5984,9837,10535,10714,51659,64785,84296	DNA2,FEN1,LIG1,MCM3,MCM4,MCM7,PCNA,RFC4,GINS1,RNASEH2A,POLD3,GINS2,GINS3,GINS4
3_Member	GO Biological Processes	GO:0022616	DNA strand elongation	-16.8415	-14.6567	14/29	1763,2237,3978,4172,4173,4176,5111,5984,9837,10535,10714,51659,64785,84296	DNA2,FEN1,LIG1,MCM3,MCM4,MCM7,PCNA,RFC4,GINS1,RNASEH2A,POLD3,GINS2,GINS3,GINS4
3_Member	Reactome Gene Sets	R-HSA-69002	DNA Replication Pre-Initiation	-15.3002	-13.147	19/85	990,4171,4172,4173,4174,4175,4176,4998,5427,5557,5558,8318,10926,23594,23649,51053,55388,81620,84515	CDC6,MCM2,MCM3,MCM4,MCM5,MCM6,MCM7,ORC1,POLE2,PRIM1,PRIM2,CDC45,DBF4,ORC6,POLA2,GMNN,MCM10,CDT1,MCM8
3_Member	Reactome Gene Sets	R-HSA-69052	Switching of origins to a post-replicative state	-10.186	-8.21448	15/91	890,898,990,4171,4172,4173,4174,4175,4176,4998,6502,11065,23594,81620,84515	CCNA2,CCNE1,CDC6,MCM2,MCM3,MCM4,MCM5,MCM6,MCM7,ORC1,SKP2,UBE2C,ORC6,CDT1,MCM8
3_Member	Reactome Gene Sets	R-HSA-68949	Orc1 removal from chromatin	-9.50183	-7.55525	13/71	890,990,4171,4172,4173,4174,4175,4176,4998,6502,23594,81620,84515	CCNA2,CDC6,MCM2,MCM3,MCM4,MCM5,MCM6,MCM7,ORC1,SKP2,ORC6,CDT1,MCM8
3_Member	Reactome Gene Sets	R-HSA-68867	Assembly of the pre-replicative complex	-8.62435	-6.72988	12/68	990,4171,4172,4173,4174,4175,4176,4998,23594,51053,81620,84515	CDC6,MCM2,MCM3,MCM4,MCM5,MCM6,MCM7,ORC1,ORC6,GMNN,CDT1,MCM8
4_Summary	GO Biological Processes	GO:0044770	cell cycle phase transition	-59.3534	-56.0485	96/647	641,672,699,701,890,891,898,899,983,990,991,993,995,1019,1029,1031,1033,1062,1063,1111,1164,1843,2146,2305,3161,4085,4171,4172,4173,4174,4175,4176,4751,4998,5111,5347,5427,5471,5557,5558,5591,6241,6502,6659,6683,6790,7023,7157,7272,7283,7517,8318,8914,9088,9133,9212,9700,9735,9787,9793,9833,9928,10403,10460,10733,10926,11065,11073,11178,11200,22974,23594,23649,26271,27085,51053,51512,51514,54443,…	BLM,BRCA1,BUB1,BUB1B,CCNA2,CCNB1,CCNE1,CCNF,CDK1,CDC6,CDC20,CDC25A,CDC25C,CDK4,CDKN2A,CDKN2C,CDKN3,CENPE,CENPF,CHEK1,CKS2,DUSP1,EZH2,FOXM1,HMMR,MAD2L1,MCM2,MCM3,MCM4,MCM5,MCM6,MCM7,NEK2,ORC1,PCNA,PLK1,POLE2,PPAT,PRIM1,PRIM2,PRKDC,RRM2,SKP2,SOX4,SPAST,AURKA,TFAP4,TP53,TTK,TUBG1,XRCC3,CDC45,TIMELESS,PKMYT1,CCNB2,AURKB,ESPL1,KNTC1,DLGAP5,CKAP5,MELK,KIF14,NDC80,TACC3,PLK4,DBF4,UBE2C,TOPBP1,LZTS1,CHEK…
4_Member	GO Biological Processes	GO:0044770	cell cycle phase transition	-59.3534	-56.0485	96/647	641,672,699,701,890,891,898,899,983,990,991,993,995,1019,1029,1031,1033,1062,1063,1111,1164,1843,2146,2305,3161,4085,4171,4172,4173,4174,4175,4176,4751,4998,5111,5347,5427,5471,5557,5558,5591,6241,6502,6659,6683,6790,7023,7157,7272,7283,7517,8318,8914,9088,9133,9212,9700,9735,9787,9793,9833,9928,10403,10460,10733,10926,11065,11073,11178,11200,22974,23594,23649,26271,27085,51053,51512,51514,54443,…	BLM,BRCA1,BUB1,BUB1B,CCNA2,CCNB1,CCNE1,CCNF,CDK1,CDC6,CDC20,CDC25A,CDC25C,CDK4,CDKN2A,CDKN2C,CDKN3,CENPE,CENPF,CHEK1,CKS2,DUSP1,EZH2,FOXM1,HMMR,MAD2L1,MCM2,MCM3,MCM4,MCM5,MCM6,MCM7,NEK2,ORC1,PCNA,PLK1,POLE2,PPAT,PRIM1,PRIM2,PRKDC,RRM2,SKP2,SOX4,SPAST,AURKA,TFAP4,TP53,TTK,TUBG1,XRCC3,CDC45,TIMELESS,PKMYT1,CCNB2,AURKB,ESPL1,KNTC1,DLGAP5,CKAP5,MELK,KIF14,NDC80,TACC3,PLK4,DBF4,UBE2C,TOPBP1,LZTS1,CHEK…
4_Member	GO Biological Processes	GO:0044772	mitotic cell cycle phase transition	-59.0264	-55.7593	93/602	641,672,699,701,890,891,898,899,983,990,991,993,995,1019,1029,1031,1033,1062,1063,1164,1843,2146,2305,3161,4085,4171,4172,4173,4174,4175,4176,4751,4998,5111,5347,5427,5471,5557,5558,5591,6241,6502,6659,6683,6790,7023,7157,7272,7283,7517,8318,9088,9133,9212,9700,9735,9787,9793,9833,9928,10403,10460,10733,10926,11065,11073,11178,11200,22974,23594,23649,26271,27085,51053,51512,51514,54443,54908,5515…	BLM,BRCA1,BUB1,BUB1B,CCNA2,CCNB1,CCNE1,CCNF,CDK1,CDC6,CDC20,CDC25A,CDC25C,CDK4,CDKN2A,CDKN2C,CDKN3,CENPE,CENPF,CKS2,DUSP1,EZH2,FOXM1,HMMR,MAD2L1,MCM2,MCM3,MCM4,MCM5,MCM6,MCM7,NEK2,ORC1,PCNA,PLK1,POLE2,PPAT,PRIM1,PRIM2,PRKDC,RRM2,SKP2,SOX4,SPAST,AURKA,TFAP4,TP53,TTK,TUBG1,XRCC3,CDC45,PKMYT1,CCNB2,AURKB,ESPL1,KNTC1,DLGAP5,CKAP5,MELK,KIF14,NDC80,TACC3,PLK4,DBF4,UBE2C,TOPBP1,LZTS1,CHEK2,TPX2,ORC6,POL…
4_Member	GO Biological Processes	GO:0010564	regulation of cell cycle process	-51.2711	-48.1289	96/791	641,672,675,699,701,891,899,983,990,991,993,995,1019,1029,1031,1062,1063,1111,1843,1894,2146,2237,2305,3161,3619,3832,4085,4288,4751,4998,5111,5347,5591,5888,6241,6491,6659,6683,6790,7023,7157,7272,7283,7517,8318,9055,9088,9212,9232,9493,9700,9735,9787,9793,9928,10112,10403,10460,10615,10733,10919,10926,11065,11073,11113,11200,22974,25886,26271,27085,29127,29899,51203,51512,51514,54443,54908,5515…	BLM,BRCA1,BRCA2,BUB1,BUB1B,CCNB1,CCNF,CDK1,CDC6,CDC20,CDC25A,CDC25C,CDK4,CDKN2A,CDKN2C,CENPE,CENPF,CHEK1,DUSP1,ECT2,EZH2,FEN1,FOXM1,HMMR,INCENP,KIF11,MAD2L1,MKI67,NEK2,ORC1,PCNA,PLK1,PRKDC,RAD51,RRM2,STIL,SOX4,SPAST,AURKA,TFAP4,TP53,TTK,TUBG1,XRCC3,CDC45,PRC1,PKMYT1,AURKB,PTTG1,KIF23,ESPL1,KNTC1,DLGAP5,CKAP5,KIF14,KIF20A,NDC80,TACC3,SPAG5,PLK4,EHMT2,DBF4,UBE2C,TOPBP1,CIT,CHEK2,TPX2,POC1A,FBXO5,MT…
4_Member	GO Biological Processes	GO:0007346	regulation of mitotic cell cycle	-43.74	-40.6948	82/671	641,672,675,699,701,891,983,990,991,993,995,1019,1029,1031,1062,1063,1111,1164,1843,2146,2177,3161,3169,3619,3832,4085,4288,4436,4751,4998,5111,5347,5591,6659,6790,7023,7153,7157,7272,7283,7517,8318,9088,9212,9232,9700,9735,9787,9793,9928,10403,10460,10733,11065,11073,11130,11200,22974,26271,27085,29899,51203,51512,51514,54443,54908,55159,55722,63967,64793,79733,79866,79915,81620,84722,90381,9332…	BLM,BRCA1,BRCA2,BUB1,BUB1B,CCNB1,CDK1,CDC6,CDC20,CDC25A,CDC25C,CDK4,CDKN2A,CDKN2C,CENPE,CENPF,CHEK1,CKS2,DUSP1,EZH2,FANCD2,HMMR,FOXA1,INCENP,KIF11,MAD2L1,MKI67,MSH2,NEK2,ORC1,PCNA,PLK1,PRKDC,SOX4,AURKA,TFAP4,TOP2A,TP53,TTK,TUBG1,XRCC3,CDC45,PKMYT1,AURKB,PTTG1,ESPL1,KNTC1,DLGAP5,CKAP5,KIF14,NDC80,TACC3,PLK4,UBE2C,TOPBP1,ZWINT,CHEK2,TPX2,FBXO5,MTBP,GPSM2,NUSAP1,GTSE1,DTL,ANLN,SPDL1,RFWD3,CEP72,CLSP…
4_Member	GO Biological Processes	GO:0000075	cell cycle checkpoint	-38.7575	-35.8426	49/219	641,672,699,701,891,983,990,991,995,1063,1111,1763,1843,2177,3014,4085,4436,4998,5111,5347,5591,6659,6790,7153,7157,7272,7517,8318,8914,9212,9735,10403,11073,11130,11200,51512,51514,54908,55159,63967,79733,79968,81620,83695,83990,90381,144455,146956,348654	BLM,BRCA1,BUB1,BUB1B,CCNB1,CDK1,CDC6,CDC20,CDC25C,CENPF,CHEK1,DNA2,DUSP1,FANCD2,H2AX,MAD2L1,MSH2,ORC1,PCNA,PLK1,PRKDC,SOX4,AURKA,TOP2A,TP53,TTK,XRCC3,CDC45,TIMELESS,AURKB,KNTC1,NDC80,TOPBP1,ZWINT,CHEK2,GTSE1,DTL,SPDL1,RFWD3,CLSPN,E2F8,WDR76,CDT1,RHNO1,BRIP1,TICRR,E2F7,EME1,GEN1
4_Member	GO Biological Processes	GO:1901987	regulation of cell cycle phase transition	-35.8984	-33.0573	64/486	641,672,699,701,891,983,990,991,993,995,1019,1029,1031,1062,1063,1111,1843,2146,3161,4085,4751,4998,5111,5347,5591,6659,6790,7023,7157,7272,7283,7517,8318,9212,9700,9735,9787,9793,9928,10403,10733,10926,11065,11073,11200,22974,26271,27085,51512,51514,54443,54908,55159,55722,63967,79733,79915,81610,81620,90381,93323,113130,144455,348654	BLM,BRCA1,BUB1,BUB1B,CCNB1,CDK1,CDC6,CDC20,CDC25A,CDC25C,CDK4,CDKN2A,CDKN2C,CENPE,CENPF,CHEK1,DUSP1,EZH2,HMMR,MAD2L1,NEK2,ORC1,PCNA,PLK1,PRKDC,SOX4,AURKA,TFAP4,TP53,TTK,TUBG1,XRCC3,CDC45,AURKB,ESPL1,KNTC1,DLGAP5,CKAP5,KIF14,NDC80,PLK4,DBF4,UBE2C,TOPBP1,CHEK2,TPX2,FBXO5,MTBP,GTSE1,DTL,ANLN,SPDL1,RFWD3,CEP72,CLSPN,E2F8,ATAD5,FAM83D,CDT1,TICRR,HAUS8,CDCA5,E2F7,GEN1
4_Member	GO Biological Processes	GO:1901990	regulation of mitotic cell cycle phase transition	-35.0401	-32.2526	61/448	641,672,699,701,891,983,990,991,993,995,1019,1029,1031,1062,1063,1843,2146,3161,4085,4751,4998,5111,5347,5591,6659,6790,7023,7157,7272,7283,7517,8318,9212,9700,9735,9787,9793,9928,10403,10733,11065,11073,11200,22974,26271,27085,51512,51514,54443,54908,55159,55722,63967,79733,79915,81620,90381,93323,113130,144455,348654	BLM,BRCA1,BUB1,BUB1B,CCNB1,CDK1,CDC6,CDC20,CDC25A,CDC25C,CDK4,CDKN2A,CDKN2C,CENPE,CENPF,DUSP1,EZH2,HMMR,MAD2L1,NEK2,ORC1,PCNA,PLK1,PRKDC,SOX4,AURKA,TFAP4,TP53,TTK,TUBG1,XRCC3,CDC45,AURKB,ESPL1,KNTC1,DLGAP5,CKAP5,KIF14,NDC80,PLK4,UBE2C,TOPBP1,CHEK2,TPX2,FBXO5,MTBP,GTSE1,DTL,ANLN,SPDL1,RFWD3,CEP72,CLSPN,E2F8,ATAD5,CDT1,TICRR,HAUS8,CDCA5,E2F7,GEN1
4_Member	GO Biological Processes	GO:0045786	negative regulation of cell cycle	-35.0307	-32.2526	71/638	641,672,699,701,891,899,983,990,991,995,1019,1029,1031,1033,1063,1111,1763,1843,2146,2177,2305,3014,4085,4436,4751,4851,4998,5111,5347,5591,5888,6241,6659,6790,7023,7153,7157,7272,7517,8318,8914,9212,9232,9700,9735,10403,10919,11073,11130,11145,11200,26271,26471,27085,51053,51512,51514,54908,55159,55771,63967,79733,79968,81620,83695,83990,90381,144455,146956,220042,348654	BLM,BRCA1,BUB1,BUB1B,CCNB1,CCNF,CDK1,CDC6,CDC20,CDC25C,CDK4,CDKN2A,CDKN2C,CDKN3,CENPF,CHEK1,DNA2,DUSP1,EZH2,FANCD2,FOXM1,H2AX,MAD2L1,MSH2,NEK2,NOTCH1,ORC1,PCNA,PLK1,PRKDC,RAD51,RRM2,SOX4,AURKA,TFAP4,TOP2A,TP53,TTK,XRCC3,CDC45,TIMELESS,AURKB,PTTG1,ESPL1,KNTC1,NDC80,EHMT2,TOPBP1,ZWINT,PLAAT3,CHEK2,FBXO5,NUPR1,MTBP,GMNN,GTSE1,DTL,SPDL1,RFWD3,PRR11,CLSPN,E2F8,WDR76,CDT1,RHNO1,BRIP1,TICRR,E2F7,EME1,DD…
4_Member	GO Biological Processes	GO:0007093	mitotic cell cycle checkpoint	-33.0339	-30.3409	40/166	641,672,699,701,891,983,990,991,995,1063,1843,2177,4085,4436,4998,5111,5347,5591,6659,6790,7153,7157,7272,7517,9212,9735,10403,11073,11130,11200,51512,54908,55159,63967,79733,81620,90381,144455,146956,348654	BLM,BRCA1,BUB1,BUB1B,CCNB1,CDK1,CDC6,CDC20,CDC25C,CENPF,DUSP1,FANCD2,MAD2L1,MSH2,ORC1,PCNA,PLK1,PRKDC,SOX4,AURKA,TOP2A,TP53,TTK,XRCC3,AURKB,KNTC1,NDC80,TOPBP1,ZWINT,CHEK2,GTSE1,SPDL1,RFWD3,CLSPN,E2F8,CDT1,TICRR,E2F7,EME1,GEN1
4_Member	GO Biological Processes	GO:0045787	positive regulation of cell cycle	-30.0357	-27.4377	53/396	672,675,891,983,990,993,995,1019,1111,1164,1894,2146,2237,3169,4085,5111,6659,6683,6790,7023,7157,7517,8318,9212,9493,9700,9787,9928,10403,10615,10733,10926,11065,11113,11200,25886,26271,26471,27085,29127,29899,51203,51512,51514,79733,79915,81610,81620,83695,84722,113130,144455,348654	BRCA1,BRCA2,CCNB1,CDK1,CDC6,CDC25A,CDC25C,CDK4,CHEK1,CKS2,ECT2,EZH2,FEN1,FOXA1,MAD2L1,PCNA,SOX4,SPAST,AURKA,TFAP4,TP53,XRCC3,CDC45,AURKB,KIF23,ESPL1,DLGAP5,KIF14,NDC80,SPAG5,PLK4,DBF4,UBE2C,CIT,CHEK2,POC1A,FBXO5,NUPR1,MTBP,RACGAP1,GPSM2,NUSAP1,GTSE1,DTL,E2F8,ATAD5,FAM83D,CDT1,RHNO1,PSRC1,CDCA5,E2F7,GEN1
4_Member	GO Biological Processes	GO:0045930	negative regulation of mitotic cell cycle	-29.2211	-26.6742	49/341	641,672,699,701,891,983,990,991,995,1019,1029,1031,1063,1111,1843,2146,2177,4085,4436,4998,5111,5347,5591,6659,6790,7153,7157,7272,7517,9212,9232,9735,10403,11073,11130,11200,26271,27085,51512,54908,55159,63967,79733,81620,90381,144455,146956,220042,348654	BLM,BRCA1,BUB1,BUB1B,CCNB1,CDK1,CDC6,CDC20,CDC25C,CDK4,CDKN2A,CDKN2C,CENPF,CHEK1,DUSP1,EZH2,FANCD2,MAD2L1,MSH2,ORC1,PCNA,PLK1,PRKDC,SOX4,AURKA,TOP2A,TP53,TTK,XRCC3,AURKB,PTTG1,KNTC1,NDC80,TOPBP1,ZWINT,CHEK2,FBXO5,MTBP,GTSE1,SPDL1,RFWD3,CLSPN,E2F8,CDT1,TICRR,E2F7,EME1,DDIAS,GEN1
4_Member	GO Biological Processes	GO:0010948	negative regulation of cell cycle process	-29.1625	-26.6224	50/359	641,672,699,701,891,899,983,990,991,995,1019,1029,1031,1063,1111,1843,2146,4085,4751,4998,5111,5347,5591,5888,6241,6659,6790,7023,7157,7272,7517,9212,9232,9700,10403,10919,11073,11200,26271,27085,51512,51514,54908,55159,63967,79733,81620,90381,144455,348654	BLM,BRCA1,BUB1,BUB1B,CCNB1,CCNF,CDK1,CDC6,CDC20,CDC25C,CDK4,CDKN2A,CDKN2C,CENPF,CHEK1,DUSP1,EZH2,MAD2L1,NEK2,ORC1,PCNA,PLK1,PRKDC,RAD51,RRM2,SOX4,AURKA,TFAP4,TP53,TTK,XRCC3,AURKB,PTTG1,ESPL1,NDC80,EHMT2,TOPBP1,CHEK2,FBXO5,MTBP,GTSE1,DTL,SPDL1,RFWD3,CLSPN,E2F8,CDT1,TICRR,E2F7,GEN1
4_Member	GO Biological Processes	GO:0090068	positive regulation of cell cycle process	-28.5706	-26.0504	46/302	672,891,983,990,993,995,1019,1894,2146,2237,4085,5111,6659,6683,6790,7157,7517,8318,9212,9493,9700,9787,9928,10403,10615,10733,10926,11065,11113,11200,25886,26271,27085,29127,29899,51203,51512,51514,79733,79915,81610,81620,83695,113130,144455,348654	BRCA1,CCNB1,CDK1,CDC6,CDC25A,CDC25C,CDK4,ECT2,EZH2,FEN1,MAD2L1,PCNA,SOX4,SPAST,AURKA,TP53,XRCC3,CDC45,AURKB,KIF23,ESPL1,DLGAP5,KIF14,NDC80,SPAG5,PLK4,DBF4,UBE2C,CIT,CHEK2,POC1A,FBXO5,MTBP,RACGAP1,GPSM2,NUSAP1,GTSE1,DTL,E2F8,ATAD5,FAM83D,CDT1,RHNO1,CDCA5,E2F7,GEN1
4_Member	GO Biological Processes	GO:0031570	DNA integrity checkpoint	-27.2841	-24.8011	35/161	641,672,891,983,990,995,1111,1763,2177,3014,4436,4998,5111,5347,5591,6659,6790,7153,7157,8318,8914,11073,11200,51512,51514,55159,63967,79733,79968,81620,83695,83990,90381,144455,146956	BLM,BRCA1,CCNB1,CDK1,CDC6,CDC25C,CHEK1,DNA2,FANCD2,H2AX,MSH2,ORC1,PCNA,PLK1,PRKDC,SOX4,AURKA,TOP2A,TP53,CDC45,TIMELESS,TOPBP1,CHEK2,GTSE1,DTL,RFWD3,CLSPN,E2F8,WDR76,CDT1,RHNO1,BRIP1,TICRR,E2F7,EME1
4_Member	GO Biological Processes	GO:1901988	negative regulation of cell cycle phase transition	-25.435	-22.9808	41/270	641,672,699,701,891,983,990,991,995,1019,1029,1031,1063,1111,1843,2146,4085,4998,5111,5347,5591,6659,6790,7157,7272,7517,9212,10403,11073,11200,26271,51512,51514,54908,55159,63967,79733,81620,90381,144455,348654	BLM,BRCA1,BUB1,BUB1B,CCNB1,CDK1,CDC6,CDC20,CDC25C,CDK4,CDKN2A,CDKN2C,CENPF,CHEK1,DUSP1,EZH2,MAD2L1,ORC1,PCNA,PLK1,PRKDC,SOX4,AURKA,TP53,TTK,XRCC3,AURKB,NDC80,TOPBP1,CHEK2,FBXO5,GTSE1,DTL,SPDL1,RFWD3,CLSPN,E2F8,CDT1,TICRR,E2F7,GEN1
4_Member	GO Biological Processes	GO:1901991	negative regulation of mitotic cell cycle phase transition	-24.5899	-22.1521	39/251	641,672,699,701,891,983,990,991,995,1019,1029,1031,1063,1843,2146,4085,4998,5111,5347,5591,6659,6790,7157,7272,7517,9212,10403,11073,11200,26271,51512,54908,55159,63967,79733,81620,90381,144455,348654	BLM,BRCA1,BUB1,BUB1B,CCNB1,CDK1,CDC6,CDC20,CDC25C,CDK4,CDKN2A,CDKN2C,CENPF,DUSP1,EZH2,MAD2L1,ORC1,PCNA,PLK1,PRKDC,SOX4,AURKA,TP53,TTK,XRCC3,AURKB,NDC80,TOPBP1,CHEK2,FBXO5,GTSE1,SPDL1,RFWD3,CLSPN,E2F8,CDT1,TICRR,E2F7,GEN1
4_Member	GO Biological Processes	GO:0000077	DNA damage checkpoint	-19.9261	-17.6093	28/151	641,672,891,983,995,1111,2177,3014,4436,5111,5347,5591,6659,6790,7157,11073,11200,51512,51514,55159,63967,79733,79968,83695,83990,90381,144455,146956	BLM,BRCA1,CCNB1,CDK1,CDC25C,CHEK1,FANCD2,H2AX,MSH2,PCNA,PLK1,PRKDC,SOX4,AURKA,TP53,TOPBP1,CHEK2,GTSE1,DTL,RFWD3,CLSPN,E2F8,WDR76,RHNO1,BRIP1,TICRR,E2F7,EME1
4_Member	GO Biological Processes	GO:0044774	mitotic DNA integrity checkpoint	-17.8896	-15.6639	23/108	641,891,983,990,995,2177,4436,4998,5111,5591,6659,6790,7153,7157,11073,11200,51512,55159,63967,79733,90381,144455,146956	BLM,CCNB1,CDK1,CDC6,CDC25C,FANCD2,MSH2,ORC1,PCNA,PRKDC,SOX4,AURKA,TOP2A,TP53,TOPBP1,CHEK2,GTSE1,RFWD3,CLSPN,E2F8,TICRR,E2F7,EME1
4_Member	GO Biological Processes	GO:0044773	mitotic DNA damage checkpoint	-14.9803	-12.8409	20/101	641,891,983,995,2177,4436,5111,5591,6659,6790,7157,11073,11200,51512,55159,63967,79733,90381,144455,146956	BLM,CCNB1,CDK1,CDC25C,FANCD2,MSH2,PCNA,PRKDC,SOX4,AURKA,TP53,TOPBP1,CHEK2,GTSE1,RFWD3,CLSPN,E2F8,TICRR,E2F7,EME1
4_Member	GO Biological Processes	GO:0072401	signal transduction involved in DNA integrity checkpoint	-12.8372	-10.7788	16/73	672,891,983,995,1111,5111,5347,5591,6659,6790,7157,11200,51512,51514,79733,144455	BRCA1,CCNB1,CDK1,CDC25C,CHEK1,PCNA,PLK1,PRKDC,SOX4,AURKA,TP53,CHEK2,GTSE1,DTL,E2F8,E2F7
4_Member	GO Biological Processes	GO:0072422	signal transduction involved in DNA damage checkpoint	-12.8372	-10.7788	16/73	672,891,983,995,1111,5111,5347,5591,6659,6790,7157,11200,51512,51514,79733,144455	BRCA1,CCNB1,CDK1,CDC25C,CHEK1,PCNA,PLK1,PRKDC,SOX4,AURKA,TP53,CHEK2,GTSE1,DTL,E2F8,E2F7
4_Member	GO Biological Processes	GO:0072395	signal transduction involved in cell cycle checkpoint	-12.7384	-10.6867	16/74	672,891,983,995,1111,5111,5347,5591,6659,6790,7157,11200,51512,51514,79733,144455	BRCA1,CCNB1,CDK1,CDC25C,CHEK1,PCNA,PLK1,PRKDC,SOX4,AURKA,TP53,CHEK2,GTSE1,DTL,E2F8,E2F7
4_Member	GO Biological Processes	GO:0042770	signal transduction in response to DNA damage	-12.5935	-10.5461	20/133	672,675,891,983,995,1111,2305,5111,5347,5591,6659,6790,7023,7157,11200,51512,51514,79733,79915,144455	BRCA1,BRCA2,CCNB1,CDK1,CDC25C,CHEK1,FOXM1,PCNA,PLK1,PRKDC,SOX4,AURKA,TFAP4,TP53,CHEK2,GTSE1,DTL,E2F8,ATAD5,E2F7
4_Member	GO Biological Processes	GO:0007050	cell cycle arrest	-11.2286	-9.21882	24/235	672,891,983,995,1019,1029,1031,1033,1843,2305,4436,4851,5111,6659,6790,7023,7157,11200,27085,51512,55771,79733,144455,220042	BRCA1,CCNB1,CDK1,CDC25C,CDK4,CDKN2A,CDKN2C,CDKN3,DUSP1,FOXM1,MSH2,NOTCH1,PCNA,SOX4,AURKA,TFAP4,TP53,CHEK2,MTBP,GTSE1,PRR11,E2F8,E2F7,DDIAS
4_Member	GO Biological Processes	GO:2000045	regulation of G1/S transition of mitotic cell cycle	-10.7728	-8.77873	21/185	891,983,990,995,1019,1029,1031,2146,5111,5591,6659,6790,7157,8318,9928,11200,27085,51512,55159,79733,144455	CCNB1,CDK1,CDC6,CDC25C,CDK4,CDKN2A,CDKN2C,EZH2,PCNA,PRKDC,SOX4,AURKA,TP53,CDC45,KIF14,CHEK2,MTBP,GTSE1,RFWD3,E2F8,E2F7
4_Member	GO Biological Processes	GO:1902806	regulation of cell cycle G1/S phase transition	-10.7269	-8.73854	22/206	891,983,990,995,1019,1029,1031,2146,5111,5591,6659,6790,7157,8318,9928,11200,27085,51512,55159,79733,81610,144455	CCNB1,CDK1,CDC6,CDC25C,CDK4,CDKN2A,CDKN2C,EZH2,PCNA,PRKDC,SOX4,AURKA,TP53,CDC45,KIF14,CHEK2,MTBP,GTSE1,RFWD3,E2F8,FAM83D,E2F7
4_Member	GO Biological Processes	GO:0031571	mitotic G1 DNA damage checkpoint	-10.1904	-8.21708	13/63	891,983,995,5111,5591,6659,6790,7157,11200,51512,55159,79733,144455	CCNB1,CDK1,CDC25C,PCNA,PRKDC,SOX4,AURKA,TP53,CHEK2,GTSE1,RFWD3,E2F8,E2F7
4_Member	GO Biological Processes	GO:0044783	G1 DNA damage checkpoint	-10.0988	-8.13274	13/64	891,983,995,5111,5591,6659,6790,7157,11200,51512,55159,79733,144455	CCNB1,CDK1,CDC25C,PCNA,PRKDC,SOX4,AURKA,TP53,CHEK2,GTSE1,RFWD3,E2F8,E2F7
4_Member	GO Biological Processes	GO:0044819	mitotic G1/S transition checkpoint	-10.0988	-8.13274	13/64	891,983,995,5111,5591,6659,6790,7157,11200,51512,55159,79733,144455	CCNB1,CDK1,CDC25C,PCNA,PRKDC,SOX4,AURKA,TP53,CHEK2,GTSE1,RFWD3,E2F8,E2F7
4_Member	GO Biological Processes	GO:2000134	negative regulation of G1/S transition of mitotic cell cycle	-10.0286	-8.06619	17/126	891,983,995,1019,1029,1031,2146,5111,5591,6659,6790,7157,11200,51512,55159,79733,144455	CCNB1,CDK1,CDC25C,CDK4,CDKN2A,CDKN2C,EZH2,PCNA,PRKDC,SOX4,AURKA,TP53,CHEK2,GTSE1,RFWD3,E2F8,E2F7
4_Member	GO Biological Processes	GO:1902807	negative regulation of cell cycle G1/S phase transition	-9.70405	-7.74873	17/132	891,983,995,1019,1029,1031,2146,5111,5591,6659,6790,7157,11200,51512,55159,79733,144455	CCNB1,CDK1,CDC25C,CDK4,CDKN2A,CDKN2C,EZH2,PCNA,PRKDC,SOX4,AURKA,TP53,CHEK2,GTSE1,RFWD3,E2F8,E2F7
4_Member	GO Biological Processes	GO:0072431	signal transduction involved in mitotic G1 DNA damage checkpoint	-9.5607	-7.61064	12/57	891,983,995,5111,5591,6659,6790,7157,11200,51512,79733,144455	CCNB1,CDK1,CDC25C,PCNA,PRKDC,SOX4,AURKA,TP53,CHEK2,GTSE1,E2F8,E2F7
4_Member	GO Biological Processes	GO:1902400	intracellular signal transduction involved in G1 DNA damage checkpoint	-9.5607	-7.61064	12/57	891,983,995,5111,5591,6659,6790,7157,11200,51512,79733,144455	CCNB1,CDK1,CDC25C,PCNA,PRKDC,SOX4,AURKA,TP53,CHEK2,GTSE1,E2F8,E2F7
4_Member	GO Biological Processes	GO:0072413	signal transduction involved in mitotic cell cycle checkpoint	-9.37515	-7.43883	12/59	891,983,995,5111,5591,6659,6790,7157,11200,51512,79733,144455	CCNB1,CDK1,CDC25C,PCNA,PRKDC,SOX4,AURKA,TP53,CHEK2,GTSE1,E2F8,E2F7
4_Member	GO Biological Processes	GO:1902402	signal transduction involved in mitotic DNA damage checkpoint	-9.37515	-7.43883	12/59	891,983,995,5111,5591,6659,6790,7157,11200,51512,79733,144455	CCNB1,CDK1,CDC25C,PCNA,PRKDC,SOX4,AURKA,TP53,CHEK2,GTSE1,E2F8,E2F7
4_Member	GO Biological Processes	GO:1902403	signal transduction involved in mitotic DNA integrity checkpoint	-9.37515	-7.43883	12/59	891,983,995,5111,5591,6659,6790,7157,11200,51512,79733,144455	CCNB1,CDK1,CDC25C,PCNA,PRKDC,SOX4,AURKA,TP53,CHEK2,GTSE1,E2F8,E2F7
4_Member	GO Biological Processes	GO:0071156	regulation of cell cycle arrest	-9.21832	-7.29202	15/106	672,891,983,995,1019,2305,5111,6659,6790,7023,7157,11200,51512,79733,144455	BRCA1,CCNB1,CDK1,CDC25C,CDK4,FOXM1,PCNA,SOX4,AURKA,TFAP4,TP53,CHEK2,GTSE1,E2F8,E2F7
4_Member	GO Biological Processes	GO:0030330	DNA damage response, signal transduction by p53 class mediator	-9.15973	-7.23672	15/107	672,675,891,983,995,2305,5111,6659,6790,7023,7157,11200,51512,79733,144455	BRCA1,BRCA2,CCNB1,CDK1,CDC25C,FOXM1,PCNA,SOX4,AURKA,TFAP4,TP53,CHEK2,GTSE1,E2F8,E2F7
4_Member	GO Biological Processes	GO:0006977	DNA damage response, signal transduction by p53 class mediator resulting in cell cycle arrest	-8.47278	-6.58289	11/56	891,983,995,5111,6659,6790,7157,11200,51512,79733,144455	CCNB1,CDK1,CDC25C,PCNA,SOX4,AURKA,TP53,CHEK2,GTSE1,E2F8,E2F7
4_Member	Reactome Gene Sets	R-HSA-6791312	TP53 Regulates Transcription of Cell Cycle Genes	-8.01791	-6.15022	10/48	890,891,898,983,995,5111,6790,7157,79733,144455	CCNA2,CCNB1,CCNE1,CDK1,CDC25C,PCNA,AURKA,TP53,E2F8,E2F7
4_Member	GO Biological Processes	GO:0071158	positive regulation of cell cycle arrest	-7.72713	-5.86942	12/81	672,891,983,995,5111,6659,6790,7157,11200,51512,79733,144455	BRCA1,CCNB1,CDK1,CDC25C,PCNA,SOX4,AURKA,TP53,CHEK2,GTSE1,E2F8,E2F7
4_Member	Reactome Gene Sets	R-HSA-6804114	TP53 Regulates Transcription of Genes Involved in G2 Cell Cycle Arrest	-6.34271	-4.56583	6/18	891,983,995,5111,6790,7157	CCNB1,CDK1,CDC25C,PCNA,AURKA,TP53
5_Summary	GO Biological Processes	GO:0071103	DNA conformation change	-48.2049	-45.0891	65/325	142,641,891,983,1029,1058,1763,2491,3008,3014,3070,3149,3619,4171,4172,4173,4174,4175,4176,5888,5984,5985,6732,7153,7157,8208,8340,8342,8348,8358,8438,8970,9401,9918,10036,10721,11339,23310,23397,25788,51203,51659,54069,54821,54892,55166,55355,55723,55839,57082,64105,64151,64946,79019,79075,79172,79682,80119,83990,84296,84515,91687,113130,401541,440081,890,2237,3978,5111,5557,5558,8331,10714,2364…	PARP1,BLM,CCNB1,CDK1,CDKN2A,CENPA,DNA2,CENPI,H1-4,H2AX,HELLS,HMGB3,INCENP,MCM2,MCM3,MCM4,MCM5,MCM6,MCM7,RAD51,RFC4,RFC5,SRPK1,TOP2A,TP53,CHAF1B,H2BC13,H2BC14,H2BC17,H3C2,RAD54L,H2BC11,RECQL4,NCAPD2,CHAF1A,POLQ,OIP5,NCAPD3,NCAPH,RAD54B,NUSAP1,GINS2,MIS18A,ERCC6L,NCAPG2,CENPQ,HJURP,ASF1B,CENPN,KNL1,CENPK,NCAPG,CENPH,CENPM,DSCC1,CENPO,CENPU,PIF1,BRIP1,GINS4,MCM8,CENPL,CDCA5,CENPP,DDX12P,CCNA2,FEN1,L…
5_Member	GO Biological Processes	GO:0071103	DNA conformation change	-48.2049	-45.0891	65/325	142,641,891,983,1029,1058,1763,2491,3008,3014,3070,3149,3619,4171,4172,4173,4174,4175,4176,5888,5984,5985,6732,7153,7157,8208,8340,8342,8348,8358,8438,8970,9401,9918,10036,10721,11339,23310,23397,25788,51203,51659,54069,54821,54892,55166,55355,55723,55839,57082,64105,64151,64946,79019,79075,79172,79682,80119,83990,84296,84515,91687,113130,401541,440081	PARP1,BLM,CCNB1,CDK1,CDKN2A,CENPA,DNA2,CENPI,H1-4,H2AX,HELLS,HMGB3,INCENP,MCM2,MCM3,MCM4,MCM5,MCM6,MCM7,RAD51,RFC4,RFC5,SRPK1,TOP2A,TP53,CHAF1B,H2BC13,H2BC14,H2BC17,H3C2,RAD54L,H2BC11,RECQL4,NCAPD2,CHAF1A,POLQ,OIP5,NCAPD3,NCAPH,RAD54B,NUSAP1,GINS2,MIS18A,ERCC6L,NCAPG2,CENPQ,HJURP,ASF1B,CENPN,KNL1,CENPK,NCAPG,CENPH,CENPM,DSCC1,CENPO,CENPU,PIF1,BRIP1,GINS4,MCM8,CENPL,CDCA5,CENPP,DDX12P
5_Member	GO Biological Processes	GO:0006323	DNA packaging	-29.9187	-27.3283	41/210	891,983,1029,1058,2491,3008,3014,3070,3619,4171,6732,7153,7157,8208,8340,8342,8348,8358,8970,9918,10036,11339,23310,23397,51203,54069,54892,55166,55355,55723,55839,57082,64105,64151,64946,79019,79172,79682,91687,113130,401541	CCNB1,CDK1,CDKN2A,CENPA,CENPI,H1-4,H2AX,HELLS,INCENP,MCM2,SRPK1,TOP2A,TP53,CHAF1B,H2BC13,H2BC14,H2BC17,H3C2,H2BC11,NCAPD2,CHAF1A,OIP5,NCAPD3,NCAPH,NUSAP1,MIS18A,NCAPG2,CENPQ,HJURP,ASF1B,CENPN,KNL1,CENPK,NCAPG,CENPH,CENPM,CENPO,CENPU,CENPL,CDCA5,CENPP
5_Member	Reactome Gene Sets	R-HSA-73886	Chromosome Maintenance	-29.43	-26.8619	35/141	641,890,1058,1763,2237,2491,3014,3978,5111,5557,5558,5984,5985,8331,8340,8342,8348,8970,10714,11339,23649,54069,55166,55355,55839,57082,64105,64946,79019,79075,79172,79682,80119,91687,401541	BLM,CCNA2,CENPA,DNA2,FEN1,CENPI,H2AX,LIG1,PCNA,PRIM1,PRIM2,RFC4,RFC5,H2AC14,H2BC13,H2BC14,H2BC17,H2BC11,POLD3,OIP5,POLA2,MIS18A,CENPQ,HJURP,CENPN,KNL1,CENPK,CENPH,CENPM,DSCC1,CENPO,CENPU,PIF1,CENPL,CENPP
5_Member	GO Biological Processes	GO:0065004	protein-DNA complex assembly	-28.3862	-25.8788	42/243	142,1058,1062,1063,2491,3008,3014,3070,4171,4172,4173,4174,4175,4176,5888,6666,7157,8208,8318,8340,8342,8348,8358,8970,9787,10036,11339,51053,54069,55166,55355,55723,55839,57082,64105,64946,79019,79172,79682,81620,91687,401541	PARP1,CENPA,CENPE,CENPF,CENPI,H1-4,H2AX,HELLS,MCM2,MCM3,MCM4,MCM5,MCM6,MCM7,RAD51,SOX12,TP53,CHAF1B,CDC45,H2BC13,H2BC14,H2BC17,H3C2,H2BC11,DLGAP5,CHAF1A,OIP5,GMNN,MIS18A,CENPQ,HJURP,ASF1B,CENPN,KNL1,CENPK,CENPH,CENPM,CENPO,CENPU,CDT1,CENPL,CENPP
5_Member	GO Biological Processes	GO:0071824	protein-DNA complex subunit organization	-26.7389	-24.2735	43/282	142,1058,1062,1063,2491,3008,3014,3070,4171,4172,4173,4174,4175,4176,5888,6666,7157,8208,8318,8340,8342,8348,8358,8970,9787,10036,11339,51053,54069,55166,55355,55723,55839,57082,64105,64946,79019,79172,79682,81620,91687,92815,401541	PARP1,CENPA,CENPE,CENPF,CENPI,H1-4,H2AX,HELLS,MCM2,MCM3,MCM4,MCM5,MCM6,MCM7,RAD51,SOX12,TP53,CHAF1B,CDC45,H2BC13,H2BC14,H2BC17,H3C2,H2BC11,DLGAP5,CHAF1A,OIP5,GMNN,MIS18A,CENPQ,HJURP,ASF1B,CENPN,KNL1,CENPK,CENPH,CENPM,CENPO,CENPU,CDT1,CENPL,H2AW,CENPP
5_Member	GO Biological Processes	GO:0006333	chromatin assembly or disassembly	-20.2804	-17.9553	31/190	1029,1058,2491,3008,3014,3070,4171,7157,8208,8340,8342,8348,8358,8970,10036,11339,54069,55166,55355,55723,55839,57082,64105,64946,79019,79172,79682,79723,91687,92815,401541	CDKN2A,CENPA,CENPI,H1-4,H2AX,HELLS,MCM2,TP53,CHAF1B,H2BC13,H2BC14,H2BC17,H3C2,H2BC11,CHAF1A,OIP5,MIS18A,CENPQ,HJURP,ASF1B,CENPN,KNL1,CENPK,CENPH,CENPM,CENPO,CENPU,SUV39H2,CENPL,H2AW,CENPP
5_Member	GO Biological Processes	GO:0031497	chromatin assembly	-19.9382	-17.6172	29/165	1029,1058,2491,3008,3014,3070,4171,7157,8208,8340,8342,8348,8358,8970,10036,11339,54069,55166,55355,55723,55839,57082,64105,64946,79019,79172,79682,91687,401541	CDKN2A,CENPA,CENPI,H1-4,H2AX,HELLS,MCM2,TP53,CHAF1B,H2BC13,H2BC14,H2BC17,H3C2,H2BC11,CHAF1A,OIP5,MIS18A,CENPQ,HJURP,ASF1B,CENPN,KNL1,CENPK,CENPH,CENPM,CENPO,CENPU,CENPL,CENPP
5_Member	Reactome Gene Sets	R-HSA-606279	Deposition of new CENPA-containing nucleosomes at the centromere	-19.1983	-16.9128	21/74	1058,2491,3014,8331,8340,8342,8348,8970,11339,54069,55166,55355,55839,57082,64105,64946,79019,79172,79682,91687,401541	CENPA,CENPI,H2AX,H2AC14,H2BC13,H2BC14,H2BC17,H2BC11,OIP5,MIS18A,CENPQ,HJURP,CENPN,KNL1,CENPK,CENPH,CENPM,CENPO,CENPU,CENPL,CENPP
5_Member	Reactome Gene Sets	R-HSA-774815	Nucleosome assembly	-19.1983	-16.9128	21/74	1058,2491,3014,8331,8340,8342,8348,8970,11339,54069,55166,55355,55839,57082,64105,64946,79019,79172,79682,91687,401541	CENPA,CENPI,H2AX,H2AC14,H2BC13,H2BC14,H2BC17,H2BC11,OIP5,MIS18A,CENPQ,HJURP,CENPN,KNL1,CENPK,CENPH,CENPM,CENPO,CENPU,CENPL,CENPP
5_Member	GO Biological Processes	GO:0034508	centromere complex assembly	-19.0963	-16.8292	19/56	1058,1062,1063,2491,3070,9787,11339,54069,55166,55355,55839,57082,64105,64946,79019,79172,79682,91687,401541	CENPA,CENPE,CENPF,CENPI,HELLS,DLGAP5,OIP5,MIS18A,CENPQ,HJURP,CENPN,KNL1,CENPK,CENPH,CENPM,CENPO,CENPU,CENPL,CENPP
5_Member	GO Biological Processes	GO:0006334	nucleosome assembly	-18.1588	-15.9264	26/145	1058,2491,3008,3014,4171,8208,8340,8342,8348,8358,8970,10036,11339,54069,55166,55355,55723,55839,57082,64105,64946,79019,79172,79682,91687,401541	CENPA,CENPI,H1-4,H2AX,MCM2,CHAF1B,H2BC13,H2BC14,H2BC17,H3C2,H2BC11,CHAF1A,OIP5,MIS18A,CENPQ,HJURP,ASF1B,CENPN,KNL1,CENPK,CENPH,CENPM,CENPO,CENPU,CENPL,CENPP
5_Member	GO Biological Processes	GO:0034728	nucleosome organization	-16.577	-14.3951	27/183	1058,2491,3008,3014,4171,8208,8340,8342,8348,8358,8970,10036,11339,54069,55166,55355,55723,55839,57082,64105,64946,79019,79172,79682,91687,92815,401541	CENPA,CENPI,H1-4,H2AX,MCM2,CHAF1B,H2BC13,H2BC14,H2BC17,H3C2,H2BC11,CHAF1A,OIP5,MIS18A,CENPQ,HJURP,ASF1B,CENPN,KNL1,CENPK,CENPH,CENPM,CENPO,CENPU,CENPL,H2AW,CENPP
5_Member	CORUM	CORUM:7394	CENP-H-I complex	-16.538	-14.3591	10/11	2491,55166,55839,64105,64946,79019,79172,79682,91687,401541	CENPI,CENPQ,CENPN,CENPK,CENPH,CENPM,CENPO,CENPU,CENPL,CENPP
5_Member	GO Biological Processes	GO:0031055	chromatin remodeling at centromere	-16.1993	-14.0233	16/47	1058,2491,3070,11339,54069,55166,55355,55839,57082,64105,64946,79019,79172,79682,91687,401541	CENPA,CENPI,HELLS,OIP5,MIS18A,CENPQ,HJURP,CENPN,KNL1,CENPK,CENPH,CENPM,CENPO,CENPU,CENPL,CENPP
5_Member	GO Biological Processes	GO:0034080	CENP-A containing nucleosome assembly	-15.4078	-13.2519	15/43	1058,2491,11339,54069,55166,55355,55839,57082,64105,64946,79019,79172,79682,91687,401541	CENPA,CENPI,OIP5,MIS18A,CENPQ,HJURP,CENPN,KNL1,CENPK,CENPH,CENPM,CENPO,CENPU,CENPL,CENPP
5_Member	GO Biological Processes	GO:0061641	CENP-A containing chromatin organization	-15.4078	-13.2519	15/43	1058,2491,11339,54069,55166,55355,55839,57082,64105,64946,79019,79172,79682,91687,401541	CENPA,CENPI,OIP5,MIS18A,CENPQ,HJURP,CENPN,KNL1,CENPK,CENPH,CENPM,CENPO,CENPU,CENPL,CENPP
5_Member	GO Biological Processes	GO:0006336	DNA replication-independent nucleosome assembly	-15.247	-13.0966	16/53	1058,2491,11339,54069,55166,55355,55723,55839,57082,64105,64946,79019,79172,79682,91687,401541	CENPA,CENPI,OIP5,MIS18A,CENPQ,HJURP,ASF1B,CENPN,KNL1,CENPK,CENPH,CENPM,CENPO,CENPU,CENPL,CENPP
5_Member	GO Biological Processes	GO:0034724	DNA replication-independent nucleosome organization	-15.1014	-12.9565	16/54	1058,2491,11339,54069,55166,55355,55723,55839,57082,64105,64946,79019,79172,79682,91687,401541	CENPA,CENPI,OIP5,MIS18A,CENPQ,HJURP,ASF1B,CENPN,KNL1,CENPK,CENPH,CENPM,CENPO,CENPU,CENPL,CENPP
5_Member	CORUM	CORUM:1179	CENP-A NAC-CAD complex	-13.4894	-11.4008	9/12	55166,55839,64105,64946,79019,79172,79682,91687,401541	CENPQ,CENPN,CENPK,CENPH,CENPM,CENPO,CENPU,CENPL,CENPP
5_Member	GO Biological Processes	GO:0006338	chromatin remodeling	-13.3083	-11.2268	24/189	86,1029,1058,1111,2491,3066,3070,3149,3169,11339,54069,55038,55166,55355,55839,57082,64105,64946,79019,79172,79682,79723,91687,401541	ACTL6A,CDKN2A,CENPA,CHEK1,CENPI,HDAC2,HELLS,HMGB3,FOXA1,OIP5,MIS18A,CDCA4,CENPQ,HJURP,CENPN,KNL1,CENPK,CENPH,CENPM,CENPO,CENPU,SUV39H2,CENPL,CENPP
5_Member	GO Biological Processes	GO:0043486	histone exchange	-13.0997	-11.0253	15/59	1058,2491,11339,54069,55166,55355,55839,57082,64105,64946,79019,79172,79682,91687,401541	CENPA,CENPI,OIP5,MIS18A,CENPQ,HJURP,CENPN,KNL1,CENPK,CENPH,CENPM,CENPO,CENPU,CENPL,CENPP
5_Member	GO Biological Processes	GO:0043044	ATP-dependent chromatin remodeling	-12.4693	-10.4263	17/90	86,1058,2491,3066,11339,54069,55166,55355,55839,57082,64105,64946,79019,79172,79682,91687,401541	ACTL6A,CENPA,CENPI,HDAC2,OIP5,MIS18A,CENPQ,HJURP,CENPN,KNL1,CENPK,CENPH,CENPM,CENPO,CENPU,CENPL,CENPP
5_Member	CORUM	CORUM:929	CEN complex	-10.5825	-8.59986	11/37	1058,2491,9493,29127,64105,64946,79019,79172,79682,79801,91687	CENPA,CENPI,KIF23,RACGAP1,CENPK,CENPH,CENPM,CENPO,CENPU,SHCBP1,CENPL
5_Member	CORUM	CORUM:7388	CENP-A nucleosomal complex	-7.10774	-5.27736	6/14	1058,2491,55355,55839,64946,91687	CENPA,CENPI,HJURP,CENPN,CENPH,CENPL
5_Member	CORUM	CORUM:927	CENP-A NAC complex	-5.8547	-4.10394	4/6	55839,64946,79019,79682	CENPN,CENPH,CENPM,CENPU
6_Summary	GO Biological Processes	GO:0006281	DNA repair	-47.5343	-44.4433	80/565	86,142,641,672,675,983,1111,1763,2175,2177,2187,2237,2305,2956,3014,3835,3978,4171,4172,4173,4174,4175,4176,4436,4796,5111,5427,5591,5888,5984,5985,7157,7374,7468,7516,7517,8208,8318,8438,8914,9156,9232,9401,9768,10036,10535,10635,10714,10721,11073,11169,11200,25788,29089,29128,51514,51659,55010,55159,55215,55247,63967,63979,79000,79728,80010,80119,83695,83990,84296,84515,90381,92815,113130,11602…	ACTL6A,PARP1,BLM,BRCA1,BRCA2,CDK1,CHEK1,DNA2,FANCA,FANCD2,FANCB,FEN1,FOXM1,MSH6,H2AX,KIF22,LIG1,MCM2,MCM3,MCM4,MCM5,MCM6,MCM7,MSH2,TONSL,PCNA,POLE2,PRKDC,RAD51,RFC4,RFC5,TP53,UNG,NSD2,XRCC2,XRCC3,CHAF1B,CDC45,RAD54L,TIMELESS,EXO1,PTTG1,RECQL4,PCLAF,CHAF1A,RNASEH2A,RAD51AP1,POLD3,POLQ,TOPBP1,WDHD1,CHEK2,RAD54B,UBE2T,UHRF1,DTL,GINS2,PARPBP,RFWD3,FANCI,NEIL3,CLSPN,FIGNL1,AUNIP,PALB2,RMI1,PIF1,RHNO1,…
6_Member	GO Biological Processes	GO:0006281	DNA repair	-47.5343	-44.4433	80/565	86,142,641,672,675,983,1111,1763,2175,2177,2187,2237,2305,2956,3014,3835,3978,4171,4172,4173,4174,4175,4176,4436,4796,5111,5427,5591,5888,5984,5985,7157,7374,7468,7516,7517,8208,8318,8438,8914,9156,9232,9401,9768,10036,10535,10635,10714,10721,11073,11169,11200,25788,29089,29128,51514,51659,55010,55159,55215,55247,63967,63979,79000,79728,80010,80119,83695,83990,84296,84515,90381,92815,113130,11602…	ACTL6A,PARP1,BLM,BRCA1,BRCA2,CDK1,CHEK1,DNA2,FANCA,FANCD2,FANCB,FEN1,FOXM1,MSH6,H2AX,KIF22,LIG1,MCM2,MCM3,MCM4,MCM5,MCM6,MCM7,MSH2,TONSL,PCNA,POLE2,PRKDC,RAD51,RFC4,RFC5,TP53,UNG,NSD2,XRCC2,XRCC3,CHAF1B,CDC45,RAD54L,TIMELESS,EXO1,PTTG1,RECQL4,PCLAF,CHAF1A,RNASEH2A,RAD51AP1,POLD3,POLQ,TOPBP1,WDHD1,CHEK2,RAD54B,UBE2T,UHRF1,DTL,GINS2,PARPBP,RFWD3,FANCI,NEIL3,CLSPN,FIGNL1,AUNIP,PALB2,RMI1,PIF1,RHNO1,…
6_Member	GO Biological Processes	GO:0006310	DNA recombination	-42.0727	-39.0486	58/300	86,142,641,672,675,1111,2177,2187,2237,2956,3008,3014,3149,3838,3978,4171,4172,4173,4174,4175,4176,4436,4796,5591,5888,7153,7374,7468,7516,7517,8318,8438,8914,9156,9401,10189,10635,10721,25788,51659,55010,55159,63979,79000,79728,79915,80010,80119,83695,83990,84057,84296,84515,116028,146956,165918,253714,348654	ACTL6A,PARP1,BLM,BRCA1,BRCA2,CHEK1,FANCD2,FANCB,FEN1,MSH6,H1-4,H2AX,HMGB3,KPNA2,LIG1,MCM2,MCM3,MCM4,MCM5,MCM6,MCM7,MSH2,TONSL,PRKDC,RAD51,TOP2A,UNG,NSD2,XRCC2,XRCC3,CDC45,RAD54L,TIMELESS,EXO1,RECQL4,ALYREF,RAD51AP1,POLQ,RAD54B,GINS2,PARPBP,RFWD3,FIGNL1,AUNIP,PALB2,ATAD5,RMI1,PIF1,RHNO1,BRIP1,MND1,GINS4,MCM8,RMI2,EME1,RNF168,MMS22L,GEN1
6_Member	GO Biological Processes	GO:0006302	double-strand break repair	-35.9528	-33.0979	50/262	142,641,672,675,1111,1763,2177,2187,2237,2305,3014,4171,4172,4173,4174,4175,4176,4436,4796,5591,5888,7157,7468,7516,7517,8318,8438,8914,9401,10635,10721,11200,25788,51659,55010,55159,63979,79000,79728,80010,83990,84296,84515,113130,116028,146956,157570,165918,253714,348654	PARP1,BLM,BRCA1,BRCA2,CHEK1,DNA2,FANCD2,FANCB,FEN1,FOXM1,H2AX,MCM2,MCM3,MCM4,MCM5,MCM6,MCM7,MSH2,TONSL,PRKDC,RAD51,TP53,NSD2,XRCC2,XRCC3,CDC45,RAD54L,TIMELESS,RECQL4,RAD51AP1,POLQ,CHEK2,RAD54B,GINS2,PARPBP,RFWD3,FIGNL1,AUNIP,PALB2,RMI1,BRIP1,GINS4,MCM8,CDCA5,RMI2,EME1,ESCO2,RNF168,MMS22L,GEN1
6_Member	GO Biological Processes	GO:0000725	recombinational repair	-33.5331	-30.8203	38/140	142,641,672,675,1111,2187,2237,3014,4171,4172,4173,4174,4175,4176,4796,5888,7516,7517,8318,8438,8914,9401,10635,10721,25788,51659,55010,55159,63979,79000,79728,80010,83695,84296,84515,116028,253714,348654	PARP1,BLM,BRCA1,BRCA2,CHEK1,FANCB,FEN1,H2AX,MCM2,MCM3,MCM4,MCM5,MCM6,MCM7,TONSL,RAD51,XRCC2,XRCC3,CDC45,RAD54L,TIMELESS,RECQL4,RAD51AP1,POLQ,RAD54B,GINS2,PARPBP,RFWD3,FIGNL1,AUNIP,PALB2,RMI1,RHNO1,GINS4,MCM8,RMI2,MMS22L,GEN1
6_Member	GO Biological Processes	GO:0000724	double-strand break repair via homologous recombination	-32.4413	-29.7763	37/138	142,641,672,675,1111,2187,2237,3014,4171,4172,4173,4174,4175,4176,4796,5888,7516,7517,8318,8438,8914,9401,10635,10721,25788,51659,55010,55159,63979,79000,79728,80010,84296,84515,116028,253714,348654	PARP1,BLM,BRCA1,BRCA2,CHEK1,FANCB,FEN1,H2AX,MCM2,MCM3,MCM4,MCM5,MCM6,MCM7,TONSL,RAD51,XRCC2,XRCC3,CDC45,RAD54L,TIMELESS,RECQL4,RAD51AP1,POLQ,RAD54B,GINS2,PARPBP,RFWD3,FIGNL1,AUNIP,PALB2,RMI1,GINS4,MCM8,RMI2,MMS22L,GEN1
6_Member	GO Biological Processes	GO:0032392	DNA geometric change	-22.0008	-19.6368	27/116	142,641,1763,3149,4171,4172,4173,4174,4175,4176,5888,5984,5985,7153,7157,8438,9401,10721,25788,51659,54821,79075,80119,83990,84296,84515,440081	PARP1,BLM,DNA2,HMGB3,MCM2,MCM3,MCM4,MCM5,MCM6,MCM7,RAD51,RFC4,RFC5,TOP2A,TP53,RAD54L,RECQL4,POLQ,RAD54B,GINS2,ERCC6L,DSCC1,PIF1,BRIP1,GINS4,MCM8,DDX12P
6_Member	GO Biological Processes	GO:0032508	DNA duplex unwinding	-19.1069	-16.8362	24/108	142,641,1763,4171,4172,4173,4174,4175,4176,5888,5984,5985,7153,9401,10721,25788,51659,54821,79075,80119,83990,84296,84515,440081	PARP1,BLM,DNA2,MCM2,MCM3,MCM4,MCM5,MCM6,MCM7,RAD51,RFC4,RFC5,TOP2A,RECQL4,POLQ,RAD54B,GINS2,ERCC6L,DSCC1,PIF1,BRIP1,GINS4,MCM8,DDX12P
7_Summary	GO Biological Processes	GO:0000226	microtubule cytoskeleton organization	-39.9831	-36.9985	75/612	332,672,675,891,899,983,991,1058,1062,1111,3619,3832,3833,4085,4139,4605,4751,5080,5347,6491,6683,6790,7272,7283,7516,7517,9055,9212,9493,9700,9768,9787,9793,9928,10112,10403,10460,10615,10733,11004,11200,22974,24137,25886,26271,26586,29127,29899,29901,51203,51361,54908,55722,57405,63979,64793,64946,79000,79866,81930,83540,84722,89958,90417,93323,146909,151648,163786,220134,221150,259266,283431,2…	BIRC5,BRCA1,BRCA2,CCNB1,CCNF,CDK1,CDC20,CENPA,CENPE,CHEK1,INCENP,KIF11,KIFC1,MAD2L1,MARK1,MYBL2,NEK2,PAX6,PLK1,STIL,SPAST,AURKA,TTK,TUBG1,XRCC2,XRCC3,PRC1,AURKB,KIF23,ESPL1,PCLAF,DLGAP5,CKAP5,KIF14,KIF20A,NDC80,TACC3,SPAG5,PLK4,KIF2C,CHEK2,TPX2,KIF4A,POC1A,FBXO5,CKAP2,RACGAP1,GPSM2,SAC3D1,NUSAP1,HOOK1,SPDL1,CEP72,SPC25,FIGNL1,CEP85,CENPH,AUNIP,BORA,KIF18A,NUF2,PSRC1,SAPCD2,KNSTRN,HAUS8,KIF18B,SGO…
7_Member	GO Biological Processes	GO:0000226	microtubule cytoskeleton organization	-39.9831	-36.9985	75/612	332,672,675,891,899,983,991,1058,1062,1111,3619,3832,3833,4085,4139,4605,4751,5080,5347,6491,6683,6790,7272,7283,7516,7517,9055,9212,9493,9700,9768,9787,9793,9928,10112,10403,10460,10615,10733,11004,11200,22974,24137,25886,26271,26586,29127,29899,29901,51203,51361,54908,55722,57405,63979,64793,64946,79000,79866,81930,83540,84722,89958,90417,93323,146909,151648,163786,220134,221150,259266,283431,2…	BIRC5,BRCA1,BRCA2,CCNB1,CCNF,CDK1,CDC20,CENPA,CENPE,CHEK1,INCENP,KIF11,KIFC1,MAD2L1,MARK1,MYBL2,NEK2,PAX6,PLK1,STIL,SPAST,AURKA,TTK,TUBG1,XRCC2,XRCC3,PRC1,AURKB,KIF23,ESPL1,PCLAF,DLGAP5,CKAP5,KIF14,KIF20A,NDC80,TACC3,SPAG5,PLK4,KIF2C,CHEK2,TPX2,KIF4A,POC1A,FBXO5,CKAP2,RACGAP1,GPSM2,SAC3D1,NUSAP1,HOOK1,SPDL1,CEP72,SPC25,FIGNL1,CEP85,CENPH,AUNIP,BORA,KIF18A,NUF2,PSRC1,SAPCD2,KNSTRN,HAUS8,KIF18B,SGO…
7_Member	GO Biological Processes	GO:1902850	microtubule cytoskeleton organization involved in mitosis	-35.3323	-32.5302	40/147	332,891,991,1058,1062,3832,3833,4085,4605,4751,5080,5347,6491,6683,6790,7272,7283,9055,9212,9493,9700,9787,9793,10403,10460,11200,22974,24137,25886,29127,29899,51203,54908,57405,64946,79866,83540,84722,89958,284403	BIRC5,CCNB1,CDC20,CENPA,CENPE,KIF11,KIFC1,MAD2L1,MYBL2,NEK2,PAX6,PLK1,STIL,SPAST,AURKA,TTK,TUBG1,PRC1,AURKB,KIF23,ESPL1,DLGAP5,CKAP5,NDC80,TACC3,CHEK2,TPX2,KIF4A,POC1A,RACGAP1,GPSM2,NUSAP1,SPDL1,SPC25,CENPH,BORA,NUF2,PSRC1,SAPCD2,WDR62
7_Member	GO Biological Processes	GO:0007051	spindle organization	-32.8498	-30.1663	43/204	332,891,991,1062,3619,3832,3833,4605,4751,5347,6491,6683,6790,7272,7283,9055,9212,9493,9700,9787,9793,10403,10460,10615,11200,22974,24137,25886,26271,29127,29899,29901,55722,57405,64946,79000,79866,83540,84722,90417,93323,259266,284403	BIRC5,CCNB1,CDC20,CENPE,INCENP,KIF11,KIFC1,MYBL2,NEK2,PLK1,STIL,SPAST,AURKA,TTK,TUBG1,PRC1,AURKB,KIF23,ESPL1,DLGAP5,CKAP5,NDC80,TACC3,SPAG5,CHEK2,TPX2,KIF4A,POC1A,FBXO5,RACGAP1,GPSM2,SAC3D1,CEP72,SPC25,CENPH,AUNIP,BORA,NUF2,PSRC1,KNSTRN,HAUS8,ASPM,WDR62
7_Member	GO Biological Processes	GO:0007052	mitotic spindle organization	-29.2426	-26.6887	33/121	332,891,991,1062,3832,3833,4605,4751,5347,6491,6683,6790,7272,7283,9055,9212,9493,9787,9793,10403,10460,11200,22974,24137,25886,29127,29899,57405,64946,79866,83540,84722,284403	BIRC5,CCNB1,CDC20,CENPE,KIF11,KIFC1,MYBL2,NEK2,PLK1,STIL,SPAST,AURKA,TTK,TUBG1,PRC1,AURKB,KIF23,DLGAP5,CKAP5,NDC80,TACC3,CHEK2,TPX2,KIF4A,POC1A,RACGAP1,GPSM2,SPC25,CENPH,BORA,NUF2,PSRC1,WDR62
7_Member	GO Biological Processes	GO:0051225	spindle assembly	-14.4745	-12.3509	22/136	332,991,3619,3832,3833,4605,4751,5347,6790,9055,9212,9493,10615,11200,22974,24137,26271,29127,29899,29901,93323,259266	BIRC5,CDC20,INCENP,KIF11,KIFC1,MYBL2,NEK2,PLK1,AURKA,PRC1,AURKB,KIF23,SPAG5,CHEK2,TPX2,KIF4A,FBXO5,RACGAP1,GPSM2,SAC3D1,HAUS8,ASPM
7_Member	GO Biological Processes	GO:0090307	mitotic spindle assembly	-10.9134	-8.91354	14/68	332,991,3832,3833,4605,4751,5347,9055,9212,9493,11200,22974,24137,29127	BIRC5,CDC20,KIF11,KIFC1,MYBL2,NEK2,PLK1,PRC1,AURKB,KIF23,CHEK2,TPX2,KIF4A,RACGAP1
8_Summary	Reactome Gene Sets	R-HSA-69481	G2/M Checkpoints	-35.3989	-32.5841	42/168	641,672,891,983,990,993,995,1111,1763,3014,4171,4172,4173,4174,4175,4176,4998,5984,5985,7157,7468,8318,8340,8342,8348,8970,9088,9133,9156,10926,11073,11200,23594,51512,55388,63967,80010,83695,83990,84515,116028,165918,86,142,675,890,2175,2177,2187,2237,2956,3838,3978,4436,5111,5427,5591,5888,7374,7516,7517,8331,8914,9768,10635,10714,10721,29089,51514,55215,55247,79728,146956,348654,2305,3066,6659…	BLM,BRCA1,CCNB1,CDK1,CDC6,CDC25A,CDC25C,CHEK1,DNA2,H2AX,MCM2,MCM3,MCM4,MCM5,MCM6,MCM7,ORC1,RFC4,RFC5,TP53,NSD2,CDC45,H2BC13,H2BC14,H2BC17,H2BC11,PKMYT1,CCNB2,EXO1,DBF4,TOPBP1,CHEK2,ORC6,GTSE1,MCM10,CLSPN,RMI1,RHNO1,BRIP1,MCM8,RMI2,RNF168,ACTL6A,PARP1,BRCA2,CCNA2,FANCA,FANCD2,FANCB,FEN1,MSH6,KPNA2,LIG1,MSH2,PCNA,POLE2,PRKDC,RAD51,UNG,XRCC2,XRCC3,H2AC14,TIMELESS,PCLAF,RAD51AP1,POLD3,POLQ,UBE2T,DTL,…
8_Member	Reactome Gene Sets	R-HSA-69481	G2/M Checkpoints	-35.3989	-32.5841	42/168	641,672,891,983,990,993,995,1111,1763,3014,4171,4172,4173,4174,4175,4176,4998,5984,5985,7157,7468,8318,8340,8342,8348,8970,9088,9133,9156,10926,11073,11200,23594,51512,55388,63967,80010,83695,83990,84515,116028,165918	BLM,BRCA1,CCNB1,CDK1,CDC6,CDC25A,CDC25C,CHEK1,DNA2,H2AX,MCM2,MCM3,MCM4,MCM5,MCM6,MCM7,ORC1,RFC4,RFC5,TP53,NSD2,CDC45,H2BC13,H2BC14,H2BC17,H2BC11,PKMYT1,CCNB2,EXO1,DBF4,TOPBP1,CHEK2,ORC6,GTSE1,MCM10,CLSPN,RMI1,RHNO1,BRIP1,MCM8,RMI2,RNF168
8_Member	Reactome Gene Sets	R-HSA-73894	DNA Repair	-34.9168	-32.1503	54/334	86,142,641,672,675,890,1111,1763,2175,2177,2187,2237,2956,3014,3838,3978,4436,5111,5427,5591,5888,5984,5985,7157,7374,7468,7516,7517,8331,8340,8342,8348,8914,8970,9156,9768,10635,10714,10721,11073,11200,29089,51514,55215,55247,63967,79728,80010,83695,83990,116028,146956,165918,348654	ACTL6A,PARP1,BLM,BRCA1,BRCA2,CCNA2,CHEK1,DNA2,FANCA,FANCD2,FANCB,FEN1,MSH6,H2AX,KPNA2,LIG1,MSH2,PCNA,POLE2,PRKDC,RAD51,RFC4,RFC5,TP53,UNG,NSD2,XRCC2,XRCC3,H2AC14,H2BC13,H2BC14,H2BC17,TIMELESS,H2BC11,EXO1,PCLAF,RAD51AP1,POLD3,POLQ,TOPBP1,CHEK2,UBE2T,DTL,FANCI,NEIL3,CLSPN,PALB2,RMI1,RHNO1,BRIP1,RMI2,EME1,RNF168,GEN1
8_Member	Reactome Gene Sets	R-HSA-5693532	DNA Double-Strand Break Repair	-33.0339	-30.3409	40/166	142,641,672,675,890,1111,1763,2237,3014,3838,5111,5427,5591,5888,5984,5985,7157,7468,7516,7517,8340,8342,8348,8914,8970,9156,10635,10714,10721,11073,11200,63967,79728,80010,83695,83990,116028,146956,165918,348654	PARP1,BLM,BRCA1,BRCA2,CCNA2,CHEK1,DNA2,FEN1,H2AX,KPNA2,PCNA,POLE2,PRKDC,RAD51,RFC4,RFC5,TP53,NSD2,XRCC2,XRCC3,H2BC13,H2BC14,H2BC17,TIMELESS,H2BC11,EXO1,RAD51AP1,POLD3,POLQ,TOPBP1,CHEK2,CLSPN,PALB2,RMI1,RHNO1,BRIP1,RMI2,EME1,RNF168,GEN1
8_Member	Reactome Gene Sets	R-HSA-5693538	Homology Directed Repair	-31.1041	-28.4738	36/138	142,641,672,675,890,1111,1763,2237,3014,5111,5427,5888,5984,5985,7468,7516,7517,8340,8342,8348,8914,8970,9156,10635,10714,10721,11073,63967,79728,80010,83695,83990,116028,146956,165918,348654	PARP1,BLM,BRCA1,BRCA2,CCNA2,CHEK1,DNA2,FEN1,H2AX,PCNA,POLE2,RAD51,RFC4,RFC5,NSD2,XRCC2,XRCC3,H2BC13,H2BC14,H2BC17,TIMELESS,H2BC11,EXO1,RAD51AP1,POLD3,POLQ,TOPBP1,CLSPN,PALB2,RMI1,RHNO1,BRIP1,RMI2,EME1,RNF168,GEN1
8_Member	Reactome Gene Sets	R-HSA-5693567	HDR through Homologous Recombination (HRR) or Single Strand Annealing (SSA)	-27.8811	-25.3799	33/132	641,672,675,890,1111,1763,3014,5111,5427,5888,5984,5985,7468,7516,7517,8340,8342,8348,8914,8970,9156,10635,10714,11073,63967,79728,80010,83695,83990,116028,146956,165918,348654	BLM,BRCA1,BRCA2,CCNA2,CHEK1,DNA2,H2AX,PCNA,POLE2,RAD51,RFC4,RFC5,NSD2,XRCC2,XRCC3,H2BC13,H2BC14,H2BC17,TIMELESS,H2BC11,EXO1,RAD51AP1,POLD3,TOPBP1,CLSPN,PALB2,RMI1,RHNO1,BRIP1,RMI2,EME1,RNF168,GEN1
8_Member	Reactome Gene Sets	R-HSA-5685942	HDR through Homologous Recombination (HRR)	-23.1348	-20.7476	23/67	641,672,675,1111,1763,5111,5427,5888,5984,5985,7516,7517,9156,10635,10714,11073,79728,80010,83695,83990,116028,146956,348654	BLM,BRCA1,BRCA2,CHEK1,DNA2,PCNA,POLE2,RAD51,RFC4,RFC5,XRCC2,XRCC3,EXO1,RAD51AP1,POLD3,TOPBP1,PALB2,RMI1,RHNO1,BRIP1,RMI2,EME1,GEN1
8_Member	Reactome Gene Sets	R-HSA-69473	G2/M DNA damage checkpoint	-20.5323	-18.1903	24/95	641,672,891,983,995,1111,1763,3014,5984,5985,7157,7468,8340,8342,8348,8970,9156,11073,11200,80010,83695,83990,116028,165918	BLM,BRCA1,CCNB1,CDK1,CDC25C,CHEK1,DNA2,H2AX,RFC4,RFC5,TP53,NSD2,H2BC13,H2BC14,H2BC17,H2BC11,EXO1,TOPBP1,CHEK2,RMI1,RHNO1,BRIP1,RMI2,RNF168
8_Member	Reactome Gene Sets	R-HSA-5693579	Homologous DNA Pairing and Strand Exchange	-20.3146	-17.9853	18/42	641,672,675,1111,1763,5888,5984,5985,7516,7517,9156,10635,11073,79728,80010,83695,83990,116028	BLM,BRCA1,BRCA2,CHEK1,DNA2,RAD51,RFC4,RFC5,XRCC2,XRCC3,EXO1,RAD51AP1,TOPBP1,PALB2,RMI1,RHNO1,BRIP1,RMI2
8_Member	GO Biological Processes	GO:0072331	signal transduction by p53 class mediator	-18.6139	-16.361	34/268	641,672,675,891,983,995,1111,1763,2305,3066,4436,5111,5984,5985,6659,6790,7023,7157,9156,9212,9891,10919,11073,11200,22974,26471,51512,79733,79915,80010,83695,83990,116028,144455	BLM,BRCA1,BRCA2,CCNB1,CDK1,CDC25C,CHEK1,DNA2,FOXM1,HDAC2,MSH2,PCNA,RFC4,RFC5,SOX4,AURKA,TFAP4,TP53,EXO1,AURKB,NUAK1,EHMT2,TOPBP1,CHEK2,TPX2,NUPR1,GTSE1,E2F8,ATAD5,RMI1,RHNO1,BRIP1,RMI2,E2F7
8_Member	Canonical Pathways	M1	PID FANCONI PATHWAY	-17.6991	-15.4831	17/47	641,672,675,1111,2175,2177,2187,3014,5984,5985,7517,11073,29089,55215,79728,80010,83990	BLM,BRCA1,BRCA2,CHEK1,FANCA,FANCD2,FANCB,H2AX,RFC4,RFC5,XRCC3,TOPBP1,UBE2T,FANCI,PALB2,RMI1,BRIP1
8_Member	Reactome Gene Sets	R-HSA-5693607	Processing of DNA double-strand break ends	-17.6649	-15.4554	22/98	641,672,890,1111,1763,3014,5984,5985,7468,8340,8342,8348,8914,8970,9156,11073,63967,80010,83695,83990,116028,165918	BLM,BRCA1,CCNA2,CHEK1,DNA2,H2AX,RFC4,RFC5,NSD2,H2BC13,H2BC14,H2BC17,TIMELESS,H2BC11,EXO1,TOPBP1,CLSPN,RMI1,RHNO1,BRIP1,RMI2,RNF168
8_Member	Reactome Gene Sets	R-HSA-5693568	Resolution of D-loop Structures through Holliday Junction Intermediates	-17.5023	-15.299	15/33	641,672,675,1763,5888,7516,7517,9156,10635,79728,80010,83990,116028,146956,348654	BLM,BRCA1,BRCA2,DNA2,RAD51,XRCC2,XRCC3,EXO1,RAD51AP1,PALB2,RMI1,BRIP1,RMI2,EME1,GEN1
8_Member	Reactome Gene Sets	R-HSA-5693537	Resolution of D-Loop Structures	-17.2566	-15.0687	15/34	641,672,675,1763,5888,7516,7517,9156,10635,79728,80010,83990,116028,146956,348654	BLM,BRCA1,BRCA2,DNA2,RAD51,XRCC2,XRCC3,EXO1,RAD51AP1,PALB2,RMI1,BRIP1,RMI2,EME1,GEN1
8_Member	Reactome Gene Sets	R-HSA-5693616	Presynaptic phase of homologous DNA pairing and strand exchange	-16.1599	-13.9868	15/39	641,672,675,1111,1763,5888,5984,5985,7516,9156,11073,80010,83695,83990,116028	BLM,BRCA1,BRCA2,CHEK1,DNA2,RAD51,RFC4,RFC5,XRCC2,EXO1,TOPBP1,RMI1,RHNO1,BRIP1,RMI2
8_Member	Reactome Gene Sets	R-HSA-5693554	Resolution of D-loop Structures through Synthesis-Dependent Strand Annealing (SDSA)	-15.9351	-13.7649	13/26	641,672,675,1763,5888,7516,7517,9156,10635,79728,80010,83990,116028	BLM,BRCA1,BRCA2,DNA2,RAD51,XRCC2,XRCC3,EXO1,RAD51AP1,PALB2,RMI1,BRIP1,RMI2
8_Member	Reactome Gene Sets	R-HSA-6804756	Regulation of TP53 Activity through Phosphorylation	-14.6191	-12.4903	19/92	641,672,890,1111,1763,5984,5985,6790,7157,9156,9212,9891,11073,11200,22974,80010,83695,83990,116028	BLM,BRCA1,CCNA2,CHEK1,DNA2,RFC4,RFC5,AURKA,TP53,EXO1,AURKB,NUAK1,TOPBP1,CHEK2,TPX2,RMI1,RHNO1,BRIP1,RMI2
8_Member	Reactome Gene Sets	R-HSA-5633007	Regulation of TP53 Activity	-13.9561	-11.8504	23/160	641,672,890,983,1029,1111,1763,3066,5984,5985,6790,7157,9156,9212,9891,10919,11073,11200,22974,80010,83695,83990,116028	BLM,BRCA1,CCNA2,CDK1,CDKN2A,CHEK1,DNA2,HDAC2,RFC4,RFC5,AURKA,TP53,EXO1,AURKB,NUAK1,EHMT2,TOPBP1,CHEK2,TPX2,RMI1,RHNO1,BRIP1,RMI2
8_Member	Reactome Gene Sets	R-HSA-3700989	Transcriptional Regulation by TP53	-13.7249	-11.6217	33/364	332,641,672,890,891,898,983,995,1029,1111,1763,2177,3066,4436,5111,5984,5985,6790,7157,9156,9212,9891,10919,11073,11200,22974,55215,79733,80010,83695,83990,116028,144455	BIRC5,BLM,BRCA1,CCNA2,CCNB1,CCNE1,CDK1,CDC25C,CDKN2A,CHEK1,DNA2,FANCD2,HDAC2,MSH2,PCNA,RFC4,RFC5,AURKA,TP53,EXO1,AURKB,NUAK1,EHMT2,TOPBP1,CHEK2,TPX2,FANCI,E2F8,RMI1,RHNO1,BRIP1,RMI2,E2F7
8_Member	KEGG Pathway	hsa03440	Homologous recombination	-13.1809	-11.1018	14/48	641,672,675,5888,7516,7517,8438,10714,11073,25788,55789,79728,83990,146956	BLM,BRCA1,BRCA2,RAD51,XRCC2,XRCC3,RAD54L,POLD3,TOPBP1,RAD54B,DEPDC1B,PALB2,BRIP1,EME1
8_Member	KEGG Pathway	ko03440	Homologous recombination	-12.8109	-10.7546	13/41	641,672,675,5888,7516,7517,8438,10714,11073,25788,79728,83990,146956	BLM,BRCA1,BRCA2,RAD51,XRCC2,XRCC3,RAD54L,POLD3,TOPBP1,RAD54B,PALB2,BRIP1,EME1
8_Member	KEGG Pathway	ko03460	Fanconi anemia pathway	-12.395	-10.3562	14/54	641,672,675,2175,2177,2187,5888,29089,55215,79728,80010,83990,116028,146956	BLM,BRCA1,BRCA2,FANCA,FANCD2,FANCB,RAD51,UBE2T,FANCI,PALB2,RMI1,BRIP1,RMI2,EME1
8_Member	Reactome Gene Sets	R-HSA-5685938	HDR through Single Strand Annealing (SSA)	-12.0036	-9.97753	12/37	641,672,1763,5888,5984,5985,9156,11073,80010,83695,83990,116028	BLM,BRCA1,DNA2,RAD51,RFC4,RFC5,EXO1,TOPBP1,RMI1,RHNO1,BRIP1,RMI2
8_Member	KEGG Pathway	hsa03460	Fanconi anemia pathway	-11.3965	-9.38468	14/63	641,672,675,2175,2177,2187,5888,29089,55215,79728,80010,83990,116028,146956	BLM,BRCA1,BRCA2,FANCA,FANCD2,FANCB,RAD51,UBE2T,FANCI,PALB2,RMI1,BRIP1,RMI2,EME1
8_Member	GO Biological Processes	GO:1901796	regulation of signal transduction by p53 class mediator	-11.0022	-8.99638	21/180	641,672,1111,1763,3066,5984,5985,6790,7157,9156,9212,9891,10919,11073,11200,22974,79915,80010,83695,83990,116028	BLM,BRCA1,CHEK1,DNA2,HDAC2,RFC4,RFC5,AURKA,TP53,EXO1,AURKB,NUAK1,EHMT2,TOPBP1,CHEK2,TPX2,ATAD5,RMI1,RHNO1,BRIP1,RMI2
9_Summary	GO Biological Processes	GO:0051983	regulation of chromosome segregation	-31.2151	-28.5764	33/107	699,701,891,990,991,1062,1063,1843,1894,2237,4085,4288,4751,5347,7272,7517,9212,9232,9700,9787,10403,10460,10615,11004,11065,26271,29127,54908,81620,90417,113130,116028,348654,995,1111,3832,6790,9088,9735,27085,51203,54443,64793,79866,7153,9918,23310,23397,80010,146956,142,672,1789,3008,4171,7157,8318,29028,80119,899,5217,22974,26471,26586,80206,84952,11200,55159,79968,3066,4851,9928,23251,65078	BUB1,BUB1B,CCNB1,CDC6,CDC20,CENPE,CENPF,DUSP1,ECT2,FEN1,MAD2L1,MKI67,NEK2,PLK1,TTK,XRCC3,AURKB,PTTG1,ESPL1,DLGAP5,NDC80,TACC3,SPAG5,KIF2C,UBE2C,FBXO5,RACGAP1,SPDL1,CDT1,KNSTRN,CDCA5,RMI2,GEN1,CDC25C,CHEK1,KIF11,AURKA,PKMYT1,KNTC1,MTBP,NUSAP1,ANLN,CEP85,BORA,TOP2A,NCAPD2,NCAPD3,NCAPH,RMI1,EME1,PARP1,BRCA1,DNMT3B,H1-4,MCM2,TP53,CDC45,ATAD2,PIF1,CCNF,PFN2,TPX2,NUPR1,CKAP2,FHOD3,CGNL1,CHEK2,RFWD3,WDR…
9_Member	GO Biological Processes	GO:0051983	regulation of chromosome segregation	-31.2151	-28.5764	33/107	699,701,891,990,991,1062,1063,1843,1894,2237,4085,4288,4751,5347,7272,7517,9212,9232,9700,9787,10403,10460,10615,11004,11065,26271,29127,54908,81620,90417,113130,116028,348654	BUB1,BUB1B,CCNB1,CDC6,CDC20,CENPE,CENPF,DUSP1,ECT2,FEN1,MAD2L1,MKI67,NEK2,PLK1,TTK,XRCC3,AURKB,PTTG1,ESPL1,DLGAP5,NDC80,TACC3,SPAG5,KIF2C,UBE2C,FBXO5,RACGAP1,SPDL1,CDT1,KNSTRN,CDCA5,RMI2,GEN1
9_Member	GO Biological Processes	GO:0007088	regulation of mitotic nuclear division	-29.3475	-26.7865	37/165	699,701,891,990,991,995,1062,1063,1111,1843,3832,4085,4288,4751,5347,6790,7272,7517,9088,9212,9232,9700,9735,9787,10403,10460,11065,26271,27085,51203,54443,54908,64793,79866,81620,113130,348654	BUB1,BUB1B,CCNB1,CDC6,CDC20,CDC25C,CENPE,CENPF,CHEK1,DUSP1,KIF11,MAD2L1,MKI67,NEK2,PLK1,AURKA,TTK,XRCC3,PKMYT1,AURKB,PTTG1,ESPL1,KNTC1,DLGAP5,NDC80,TACC3,UBE2C,FBXO5,MTBP,NUSAP1,ANLN,SPDL1,CEP85,BORA,CDT1,CDCA5,GEN1
9_Member	GO Biological Processes	GO:0051304	chromosome separation	-27.4887	-24.9997	29/94	699,701,891,990,991,1062,1063,1843,4085,5347,7153,7272,7517,9212,9232,9700,9787,9918,10403,10460,11065,23310,23397,26271,54908,80010,81620,146956,348654	BUB1,BUB1B,CCNB1,CDC6,CDC20,CENPE,CENPF,DUSP1,MAD2L1,PLK1,TOP2A,TTK,XRCC3,AURKB,PTTG1,ESPL1,DLGAP5,NCAPD2,NDC80,TACC3,UBE2C,NCAPD3,NCAPH,FBXO5,SPDL1,RMI1,CDT1,EME1,GEN1
9_Member	GO Biological Processes	GO:0051783	regulation of nuclear division	-26.9869	-24.5157	37/190	699,701,891,990,991,995,1062,1063,1111,1843,3832,4085,4288,4751,5347,6790,7272,7517,9088,9212,9232,9700,9735,9787,10403,10460,11065,26271,27085,51203,54443,54908,64793,79866,81620,113130,348654	BUB1,BUB1B,CCNB1,CDC6,CDC20,CDC25C,CENPE,CENPF,CHEK1,DUSP1,KIF11,MAD2L1,MKI67,NEK2,PLK1,AURKA,TTK,XRCC3,PKMYT1,AURKB,PTTG1,ESPL1,KNTC1,DLGAP5,NDC80,TACC3,UBE2C,FBXO5,MTBP,NUSAP1,ANLN,SPDL1,CEP85,BORA,CDT1,CDCA5,GEN1
9_Member	GO Biological Processes	GO:0033045	regulation of sister chromatid segregation	-24.7382	-22.2896	26/84	699,701,891,990,991,1062,1063,1843,2237,4085,5347,7272,7517,9212,9232,9700,9787,10403,10460,11065,26271,54908,81620,113130,116028,348654	BUB1,BUB1B,CCNB1,CDC6,CDC20,CENPE,CENPF,DUSP1,FEN1,MAD2L1,PLK1,TTK,XRCC3,AURKB,PTTG1,ESPL1,DLGAP5,NDC80,TACC3,UBE2C,FBXO5,SPDL1,CDT1,CDCA5,RMI2,GEN1
9_Member	GO Biological Processes	GO:0010965	regulation of mitotic sister chromatid separation	-24.2428	-21.8156	23/61	699,701,891,990,991,1062,1063,1843,4085,5347,7272,7517,9212,9232,9700,9787,10403,10460,11065,26271,54908,81620,348654	BUB1,BUB1B,CCNB1,CDC6,CDC20,CENPE,CENPF,DUSP1,MAD2L1,PLK1,TTK,XRCC3,AURKB,PTTG1,ESPL1,DLGAP5,NDC80,TACC3,UBE2C,FBXO5,SPDL1,CDT1,GEN1
9_Member	GO Biological Processes	GO:0051306	mitotic sister chromatid separation	-23.6719	-21.2551	23/64	699,701,891,990,991,1062,1063,1843,4085,5347,7272,7517,9212,9232,9700,9787,10403,10460,11065,26271,54908,81620,348654	BUB1,BUB1B,CCNB1,CDC6,CDC20,CENPE,CENPF,DUSP1,MAD2L1,PLK1,TTK,XRCC3,AURKB,PTTG1,ESPL1,DLGAP5,NDC80,TACC3,UBE2C,FBXO5,SPDL1,CDT1,GEN1
9_Member	GO Biological Processes	GO:1905818	regulation of chromosome separation	-23.3103	-20.9086	23/66	699,701,891,990,991,1062,1063,1843,4085,5347,7272,7517,9212,9232,9700,9787,10403,10460,11065,26271,54908,81620,348654	BUB1,BUB1B,CCNB1,CDC6,CDC20,CENPE,CENPF,DUSP1,MAD2L1,PLK1,TTK,XRCC3,AURKB,PTTG1,ESPL1,DLGAP5,NDC80,TACC3,UBE2C,FBXO5,SPDL1,CDT1,GEN1
9_Member	GO Biological Processes	GO:0007091	metaphase/anaphase transition of mitotic cell cycle	-23.2805	-20.8836	22/58	699,701,891,990,991,1062,1063,1843,4085,5347,7272,7517,9212,9700,9787,10403,10460,11065,26271,54908,81620,348654	BUB1,BUB1B,CCNB1,CDC6,CDC20,CENPE,CENPF,DUSP1,MAD2L1,PLK1,TTK,XRCC3,AURKB,ESPL1,DLGAP5,NDC80,TACC3,UBE2C,FBXO5,SPDL1,CDT1,GEN1
9_Member	GO Biological Processes	GO:0044784	metaphase/anaphase transition of cell cycle	-22.8936	-20.5111	22/60	699,701,891,990,991,1062,1063,1843,4085,5347,7272,7517,9212,9700,9787,10403,10460,11065,26271,54908,81620,348654	BUB1,BUB1B,CCNB1,CDC6,CDC20,CENPE,CENPF,DUSP1,MAD2L1,PLK1,TTK,XRCC3,AURKB,ESPL1,DLGAP5,NDC80,TACC3,UBE2C,FBXO5,SPDL1,CDT1,GEN1
9_Member	GO Biological Processes	GO:0033047	regulation of mitotic sister chromatid segregation	-22.3046	-19.9315	23/72	699,701,891,990,991,1062,1063,1843,4085,5347,7272,7517,9212,9232,9700,9787,10403,10460,11065,26271,54908,81620,348654	BUB1,BUB1B,CCNB1,CDC6,CDC20,CENPE,CENPF,DUSP1,MAD2L1,PLK1,TTK,XRCC3,AURKB,PTTG1,ESPL1,DLGAP5,NDC80,TACC3,UBE2C,FBXO5,SPDL1,CDT1,GEN1
9_Member	GO Biological Processes	GO:0030071	regulation of mitotic metaphase/anaphase transition	-22.1221	-19.7536	21/56	699,701,891,990,991,1062,1063,1843,4085,5347,7272,7517,9212,9700,9787,10403,11065,26271,54908,81620,348654	BUB1,BUB1B,CCNB1,CDC6,CDC20,CENPE,CENPF,DUSP1,MAD2L1,PLK1,TTK,XRCC3,AURKB,ESPL1,DLGAP5,NDC80,UBE2C,FBXO5,SPDL1,CDT1,GEN1
9_Member	GO Biological Processes	GO:1902099	regulation of metaphase/anaphase transition of cell cycle	-21.7415	-19.3864	21/58	699,701,891,990,991,1062,1063,1843,4085,5347,7272,7517,9212,9700,9787,10403,11065,26271,54908,81620,348654	BUB1,BUB1B,CCNB1,CDC6,CDC20,CENPE,CENPF,DUSP1,MAD2L1,PLK1,TTK,XRCC3,AURKB,ESPL1,DLGAP5,NDC80,UBE2C,FBXO5,SPDL1,CDT1,GEN1
9_Member	GO Biological Processes	GO:0033046	negative regulation of sister chromatid segregation	-19.8647	-17.5518	18/44	699,701,891,991,1063,1843,4085,5347,7272,7517,9212,9232,9700,10403,26271,54908,81620,348654	BUB1,BUB1B,CCNB1,CDC20,CENPF,DUSP1,MAD2L1,PLK1,TTK,XRCC3,AURKB,PTTG1,ESPL1,NDC80,FBXO5,SPDL1,CDT1,GEN1
9_Member	GO Biological Processes	GO:0045839	negative regulation of mitotic nuclear division	-19.8132	-17.5044	19/52	699,701,891,991,1063,1111,1843,4085,5347,7272,7517,9212,9232,10403,26271,27085,54908,81620,348654	BUB1,BUB1B,CCNB1,CDC20,CENPF,CHEK1,DUSP1,MAD2L1,PLK1,TTK,XRCC3,AURKB,PTTG1,NDC80,FBXO5,MTBP,SPDL1,CDT1,GEN1
9_Member	GO Biological Processes	GO:0051985	negative regulation of chromosome segregation	-19.6499	-17.345	18/45	699,701,891,991,1063,1843,4085,5347,7272,7517,9212,9232,9700,10403,26271,54908,81620,348654	BUB1,BUB1B,CCNB1,CDC20,CENPF,DUSP1,MAD2L1,PLK1,TTK,XRCC3,AURKB,PTTG1,ESPL1,NDC80,FBXO5,SPDL1,CDT1,GEN1
9_Member	GO Biological Processes	GO:2000816	negative regulation of mitotic sister chromatid separation	-19.3729	-17.0797	17/39	699,701,891,991,1063,1843,4085,5347,7272,7517,9212,9232,10403,26271,54908,81620,348654	BUB1,BUB1B,CCNB1,CDC20,CENPF,DUSP1,MAD2L1,PLK1,TTK,XRCC3,AURKB,PTTG1,NDC80,FBXO5,SPDL1,CDT1,GEN1
9_Member	GO Biological Processes	GO:1905819	negative regulation of chromosome separation	-19.1396	-16.8652	17/40	699,701,891,991,1063,1843,4085,5347,7272,7517,9212,9232,10403,26271,54908,81620,348654	BUB1,BUB1B,CCNB1,CDC20,CENPF,DUSP1,MAD2L1,PLK1,TTK,XRCC3,AURKB,PTTG1,NDC80,FBXO5,SPDL1,CDT1,GEN1
9_Member	GO Biological Processes	GO:0033044	regulation of chromosome organization	-18.8178	-16.5543	39/360	142,672,699,701,891,990,991,1062,1063,1111,1789,1843,2237,3008,4085,4171,4288,4751,5347,7153,7157,7272,7517,8318,9212,9232,9700,9787,10403,10460,11065,26271,29028,54908,80119,81620,113130,116028,348654	PARP1,BRCA1,BUB1,BUB1B,CCNB1,CDC6,CDC20,CENPE,CENPF,CHEK1,DNMT3B,DUSP1,FEN1,H1-4,MAD2L1,MCM2,MKI67,NEK2,PLK1,TOP2A,TP53,TTK,XRCC3,CDC45,AURKB,PTTG1,ESPL1,DLGAP5,NDC80,TACC3,UBE2C,FBXO5,ATAD2,SPDL1,PIF1,CDT1,CDCA5,RMI2,GEN1
9_Member	GO Biological Processes	GO:0033048	negative regulation of mitotic sister chromatid segregation	-18.6958	-16.4395	17/42	699,701,891,991,1063,1843,4085,5347,7272,7517,9212,9232,10403,26271,54908,81620,348654	BUB1,BUB1B,CCNB1,CDC20,CENPF,DUSP1,MAD2L1,PLK1,TTK,XRCC3,AURKB,PTTG1,NDC80,FBXO5,SPDL1,CDT1,GEN1
9_Member	GO Biological Processes	GO:0051784	negative regulation of nuclear division	-18.4419	-16.1994	19/60	699,701,891,991,1063,1111,1843,4085,5347,7272,7517,9212,9232,10403,26271,27085,54908,81620,348654	BUB1,BUB1B,CCNB1,CDC20,CENPF,CHEK1,DUSP1,MAD2L1,PLK1,TTK,XRCC3,AURKB,PTTG1,NDC80,FBXO5,MTBP,SPDL1,CDT1,GEN1
9_Member	GO Biological Processes	GO:0045841	negative regulation of mitotic metaphase/anaphase transition	-18.4351	-16.1961	16/36	699,701,891,991,1063,1843,4085,5347,7272,7517,9212,10403,26271,54908,81620,348654	BUB1,BUB1B,CCNB1,CDC20,CENPF,DUSP1,MAD2L1,PLK1,TTK,XRCC3,AURKB,NDC80,FBXO5,SPDL1,CDT1,GEN1
9_Member	GO Biological Processes	GO:1902100	negative regulation of metaphase/anaphase transition of cell cycle	-18.1962	-15.9605	16/37	699,701,891,991,1063,1843,4085,5347,7272,7517,9212,10403,26271,54908,81620,348654	BUB1,BUB1B,CCNB1,CDC20,CENPF,DUSP1,MAD2L1,PLK1,TTK,XRCC3,AURKB,NDC80,FBXO5,SPDL1,CDT1,GEN1
9_Member	GO Biological Processes	GO:2001251	negative regulation of chromosome organization	-17.9263	-15.6974	26/148	142,672,699,701,891,991,1063,1789,1843,3008,4085,4171,5347,7153,7272,7517,9212,9232,9700,10403,26271,29028,54908,80119,81620,348654	PARP1,BRCA1,BUB1,BUB1B,CCNB1,CDC20,CENPF,DNMT3B,DUSP1,H1-4,MAD2L1,MCM2,PLK1,TOP2A,TTK,XRCC3,AURKB,PTTG1,ESPL1,NDC80,FBXO5,ATAD2,SPDL1,PIF1,CDT1,GEN1
9_Member	GO Biological Processes	GO:0007094	mitotic spindle assembly checkpoint	-17.2566	-15.0687	15/34	699,701,891,991,1063,1843,4085,5347,7272,7517,9212,10403,54908,81620,348654	BUB1,BUB1B,CCNB1,CDC20,CENPF,DUSP1,MAD2L1,PLK1,TTK,XRCC3,AURKB,NDC80,SPDL1,CDT1,GEN1
9_Member	GO Biological Processes	GO:0031577	spindle checkpoint	-17.2566	-15.0687	15/34	699,701,891,991,1063,1843,4085,5347,7272,7517,9212,10403,54908,81620,348654	BUB1,BUB1B,CCNB1,CDC20,CENPF,DUSP1,MAD2L1,PLK1,TTK,XRCC3,AURKB,NDC80,SPDL1,CDT1,GEN1
9_Member	GO Biological Processes	GO:0071173	spindle assembly checkpoint	-17.2566	-15.0687	15/34	699,701,891,991,1063,1843,4085,5347,7272,7517,9212,10403,54908,81620,348654	BUB1,BUB1B,CCNB1,CDC20,CENPF,DUSP1,MAD2L1,PLK1,TTK,XRCC3,AURKB,NDC80,SPDL1,CDT1,GEN1
9_Member	GO Biological Processes	GO:0071174	mitotic spindle checkpoint	-17.2566	-15.0687	15/34	699,701,891,991,1063,1843,4085,5347,7272,7517,9212,10403,54908,81620,348654	BUB1,BUB1B,CCNB1,CDC20,CENPF,DUSP1,MAD2L1,PLK1,TTK,XRCC3,AURKB,NDC80,SPDL1,CDT1,GEN1
9_Member	GO Biological Processes	GO:0010639	negative regulation of organelle organization	-14.9981	-12.8559	37/418	142,672,699,701,891,899,991,1063,1111,1789,1843,3008,4085,4171,4751,5217,5347,7153,7157,7272,7517,9212,9232,9700,10403,22974,26271,26471,26586,27085,29028,54908,80119,80206,81620,84952,348654	PARP1,BRCA1,BUB1,BUB1B,CCNB1,CCNF,CDC20,CENPF,CHEK1,DNMT3B,DUSP1,H1-4,MAD2L1,MCM2,NEK2,PFN2,PLK1,TOP2A,TP53,TTK,XRCC3,AURKB,PTTG1,ESPL1,NDC80,TPX2,FBXO5,NUPR1,CKAP2,MTBP,ATAD2,SPDL1,PIF1,FHOD3,CDT1,CGNL1,GEN1
9_Member	GO Biological Processes	GO:1901976	regulation of cell cycle checkpoint	-9.91411	-7.95525	10/32	891,1843,4085,7517,10403,11200,55159,79968,81620,348654	CCNB1,DUSP1,MAD2L1,XRCC3,NDC80,CHEK2,RFWD3,WDR76,CDT1,GEN1
9_Member	GO Biological Processes	GO:0051129	negative regulation of cellular component organization	-9.80813	-7.85104	42/775	142,672,699,701,891,899,991,1063,1111,1789,1843,3008,3066,4085,4171,4751,4851,5217,5347,7153,7157,7272,7517,9212,9232,9700,9928,10403,22974,23251,26271,26471,26586,27085,29028,54908,65078,80119,80206,81620,84952,348654	PARP1,BRCA1,BUB1,BUB1B,CCNB1,CCNF,CDC20,CENPF,CHEK1,DNMT3B,DUSP1,H1-4,HDAC2,MAD2L1,MCM2,NEK2,NOTCH1,PFN2,PLK1,TOP2A,TP53,TTK,XRCC3,AURKB,PTTG1,ESPL1,KIF14,NDC80,TPX2,MINAR1,FBXO5,NUPR1,CKAP2,MTBP,ATAD2,SPDL1,RTN4R,PIF1,FHOD3,CDT1,CGNL1,GEN1
9_Member	GO Biological Processes	GO:0090231	regulation of spindle checkpoint	-8.80265	-6.902	7/14	891,1843,4085,7517,10403,81620,348654	CCNB1,DUSP1,MAD2L1,XRCC3,NDC80,CDT1,GEN1
9_Member	GO Biological Processes	GO:0090266	regulation of mitotic cell cycle spindle assembly checkpoint	-8.80265	-6.902	7/14	891,1843,4085,7517,10403,81620,348654	CCNB1,DUSP1,MAD2L1,XRCC3,NDC80,CDT1,GEN1
9_Member	GO Biological Processes	GO:1903504	regulation of mitotic spindle checkpoint	-8.80265	-6.902	7/14	891,1843,4085,7517,10403,81620,348654	CCNB1,DUSP1,MAD2L1,XRCC3,NDC80,CDT1,GEN1
9_Member	GO Biological Processes	GO:0090232	positive regulation of spindle checkpoint	-5.49284	-3.77293	4/7	4085,7517,10403,348654	MAD2L1,XRCC3,NDC80,GEN1
9_Member	GO Biological Processes	GO:0090267	positive regulation of mitotic cell cycle spindle assembly checkpoint	-5.49284	-3.77293	4/7	4085,7517,10403,348654	MAD2L1,XRCC3,NDC80,GEN1
9_Member	GO Biological Processes	GO:1901978	positive regulation of cell cycle checkpoint	-4.94877	-3.28736	4/9	4085,7517,10403,348654	MAD2L1,XRCC3,NDC80,GEN1
10_Summary	GO Biological Processes	GO:0051321	meiotic cell cycle	-30.886	-28.2722	45/254	675,699,701,898,991,993,995,1164,1843,2175,2177,2956,3014,3619,4751,5347,5888,6790,7153,7272,7283,7516,8438,9088,9156,9232,9700,9918,11022,23310,23397,25788,26271,55706,63979,80010,81930,83540,83990,84057,146956,151246,151648,256126,259266	BRCA2,BUB1,BUB1B,CCNE1,CDC20,CDC25A,CDC25C,CKS2,DUSP1,FANCA,FANCD2,MSH6,H2AX,INCENP,NEK2,PLK1,RAD51,AURKA,TOP2A,TTK,TUBG1,XRCC2,RAD54L,PKMYT1,EXO1,PTTG1,ESPL1,NCAPD2,TDRKH,NCAPD3,NCAPH,RAD54B,FBXO5,NDC1,FIGNL1,RMI1,KIF18A,NUF2,BRIP1,MND1,EME1,SGO2,SGO1,SYCE2,ASPM
10_Member	GO Biological Processes	GO:0051321	meiotic cell cycle	-30.886	-28.2722	45/254	675,699,701,898,991,993,995,1164,1843,2175,2177,2956,3014,3619,4751,5347,5888,6790,7153,7272,7283,7516,8438,9088,9156,9232,9700,9918,11022,23310,23397,25788,26271,55706,63979,80010,81930,83540,83990,84057,146956,151246,151648,256126,259266	BRCA2,BUB1,BUB1B,CCNE1,CDC20,CDC25A,CDC25C,CKS2,DUSP1,FANCA,FANCD2,MSH6,H2AX,INCENP,NEK2,PLK1,RAD51,AURKA,TOP2A,TTK,TUBG1,XRCC2,RAD54L,PKMYT1,EXO1,PTTG1,ESPL1,NCAPD2,TDRKH,NCAPD3,NCAPH,RAD54B,FBXO5,NDC1,FIGNL1,RMI1,KIF18A,NUF2,BRIP1,MND1,EME1,SGO2,SGO1,SYCE2,ASPM
10_Member	GO Biological Processes	GO:1903046	meiotic cell cycle process	-29.0734	-26.54	39/193	675,699,701,898,991,993,995,1164,2175,2177,2956,3619,5347,5888,6790,7153,7272,7283,8438,9232,9700,9918,11022,23310,23397,25788,26271,55706,63979,80010,81930,83540,83990,84057,146956,151246,151648,256126,259266	BRCA2,BUB1,BUB1B,CCNE1,CDC20,CDC25A,CDC25C,CKS2,FANCA,FANCD2,MSH6,INCENP,PLK1,RAD51,AURKA,TOP2A,TTK,TUBG1,RAD54L,PTTG1,ESPL1,NCAPD2,TDRKH,NCAPD3,NCAPH,RAD54B,FBXO5,NDC1,FIGNL1,RMI1,KIF18A,NUF2,BRIP1,MND1,EME1,SGO2,SGO1,SYCE2,ASPM
10_Member	GO Biological Processes	GO:0140013	meiotic nuclear division	-23.4756	-21.0638	33/177	675,699,701,898,991,1164,2175,2177,3619,5347,5888,6790,7153,7272,8438,9232,9700,11022,23397,25788,26271,55706,63979,80010,81930,83540,83990,84057,146956,151246,151648,256126,259266	BRCA2,BUB1,BUB1B,CCNE1,CDC20,CKS2,FANCA,FANCD2,INCENP,PLK1,RAD51,AURKA,TOP2A,TTK,RAD54L,PTTG1,ESPL1,TDRKH,NCAPH,RAD54B,FBXO5,NDC1,FIGNL1,RMI1,KIF18A,NUF2,BRIP1,MND1,EME1,SGO2,SGO1,SYCE2,ASPM
10_Member	GO Biological Processes	GO:0061982	meiosis I cell cycle process	-17.6138	-15.4074	24/124	675,898,993,995,1164,2177,2956,5347,5888,6790,7153,8438,9232,9700,25788,26271,55706,80010,83990,84057,146956,151246,151648,256126	BRCA2,CCNE1,CDC25A,CDC25C,CKS2,FANCD2,MSH6,PLK1,RAD51,AURKA,TOP2A,RAD54L,PTTG1,ESPL1,RAD54B,FBXO5,NDC1,RMI1,BRIP1,MND1,EME1,SGO2,SGO1,SYCE2
10_Member	GO Biological Processes	GO:0007127	meiosis I	-14.6331	-12.5017	21/119	675,898,1164,2177,5347,5888,6790,7153,8438,9232,9700,25788,26271,55706,80010,83990,84057,146956,151246,151648,256126	BRCA2,CCNE1,CKS2,FANCD2,PLK1,RAD51,AURKA,TOP2A,RAD54L,PTTG1,ESPL1,RAD54B,FBXO5,NDC1,RMI1,BRIP1,MND1,EME1,SGO2,SGO1,SYCE2
10_Member	GO Biological Processes	GO:0045132	meiotic chromosome segregation	-13.3606	-11.2768	18/93	699,701,898,2177,5347,7153,7272,9232,9700,23397,55706,80010,83540,83990,146956,151246,151648,256126	BUB1,BUB1B,CCNE1,FANCD2,PLK1,TOP2A,TTK,PTTG1,ESPL1,NCAPH,NDC1,RMI1,NUF2,BRIP1,EME1,SGO2,SGO1,SYCE2
10_Member	GO Biological Processes	GO:0070192	chromosome organization involved in meiotic cell cycle	-10.732	-8.74181	14/70	699,701,898,2177,3619,5888,9918,23310,23397,55706,83990,151246,151648,256126	BUB1,BUB1B,CCNE1,FANCD2,INCENP,RAD51,NCAPD2,NCAPD3,NCAPH,NDC1,BRIP1,SGO2,SGO1,SYCE2
10_Member	GO Biological Processes	GO:0045143	homologous chromosome segregation	-6.89795	-5.08951	10/62	898,2177,5347,9232,9700,55706,83990,151246,151648,256126	CCNE1,FANCD2,PLK1,PTTG1,ESPL1,NDC1,BRIP1,SGO2,SGO1,SYCE2
10_Member	GO Biological Processes	GO:0007129	synapsis	-2.7728	-1.32086	5/49	898,2177,55706,83990,256126	CCNE1,FANCD2,NDC1,BRIP1,SYCE2
11_Summary	Canonical Pathways	M129	PID PLK1 PATHWAY	-27.7957	-25.3007	23/46	699,701,891,983,991,995,1062,1894,3619,5347,6790,7283,9055,10112,10403,22974,26271,54821,63967,79682,79866,147841,151648	BUB1,BUB1B,CCNB1,CDK1,CDC20,CDC25C,CENPE,ECT2,INCENP,PLK1,AURKA,TUBG1,PRC1,KIF20A,NDC80,TPX2,FBXO5,ERCC6L,CLSPN,CENPU,BORA,SPC24,SGO1
11_Member	Canonical Pathways	M129	PID PLK1 PATHWAY	-27.7957	-25.3007	23/46	699,701,891,983,991,995,1062,1894,3619,5347,6790,7283,9055,10112,10403,22974,26271,54821,63967,79682,79866,147841,151648	BUB1,BUB1B,CCNB1,CDK1,CDC20,CDC25C,CENPE,ECT2,INCENP,PLK1,AURKA,TUBG1,PRC1,KIF20A,NDC80,TPX2,FBXO5,ERCC6L,CLSPN,CENPU,BORA,SPC24,SGO1
12_Summary	GO Biological Processes	GO:0051052	regulation of DNA metabolic process	-24.5122	-22.0798	50/451	142,641,672,675,890,983,990,1111,1763,1843,2187,2305,2956,3008,3014,3838,4436,4751,5111,5591,5888,5984,5985,7157,7468,8914,9212,10189,10635,10721,10919,10926,11200,26271,27101,51053,54069,55010,63979,79000,79075,79733,79915,80119,81620,90381,116028,144455,157570,165918	PARP1,BLM,BRCA1,BRCA2,CCNA2,CDK1,CDC6,CHEK1,DNA2,DUSP1,FANCB,FOXM1,MSH6,H1-4,H2AX,KPNA2,MSH2,NEK2,PCNA,PRKDC,RAD51,RFC4,RFC5,TP53,NSD2,TIMELESS,AURKB,ALYREF,RAD51AP1,POLQ,EHMT2,DBF4,CHEK2,FBXO5,CACYBP,GMNN,MIS18A,PARPBP,FIGNL1,AUNIP,DSCC1,E2F8,ATAD5,PIF1,CDT1,TICRR,RMI2,E2F7,ESCO2,RNF168
12_Member	GO Biological Processes	GO:0051052	regulation of DNA metabolic process	-24.5122	-22.0798	50/451	142,641,672,675,890,983,990,1111,1763,1843,2187,2305,2956,3008,3014,3838,4436,4751,5111,5591,5888,5984,5985,7157,7468,8914,9212,10189,10635,10721,10919,10926,11200,26271,27101,51053,54069,55010,63979,79000,79075,79733,79915,80119,81620,90381,116028,144455,157570,165918	PARP1,BLM,BRCA1,BRCA2,CCNA2,CDK1,CDC6,CHEK1,DNA2,DUSP1,FANCB,FOXM1,MSH6,H1-4,H2AX,KPNA2,MSH2,NEK2,PCNA,PRKDC,RAD51,RFC4,RFC5,TP53,NSD2,TIMELESS,AURKB,ALYREF,RAD51AP1,POLQ,EHMT2,DBF4,CHEK2,FBXO5,CACYBP,GMNN,MIS18A,PARPBP,FIGNL1,AUNIP,DSCC1,E2F8,ATAD5,PIF1,CDT1,TICRR,RMI2,E2F7,ESCO2,RNF168
12_Member	GO Biological Processes	GO:0006275	regulation of DNA replication	-18.7097	-16.4498	24/112	641,675,890,983,990,1763,5111,5984,5985,7157,8914,10919,10926,11200,26271,27101,51053,79075,79733,79915,81620,90381,144455,157570	BLM,BRCA2,CCNA2,CDK1,CDC6,DNA2,PCNA,RFC4,RFC5,TP53,TIMELESS,EHMT2,DBF4,CHEK2,FBXO5,CACYBP,GMNN,DSCC1,E2F8,ATAD5,CDT1,TICRR,E2F7,ESCO2
12_Member	GO Biological Processes	GO:0090329	regulation of DNA-dependent DNA replication	-14.0001	-11.8894	15/52	641,675,5111,5984,5985,8914,10926,11200,26271,51053,79075,79733,81620,90381,144455	BLM,BRCA2,PCNA,RFC4,RFC5,TIMELESS,DBF4,CHEK2,FBXO5,GMNN,DSCC1,E2F8,CDT1,TICRR,E2F7
12_Member	GO Biological Processes	GO:0051054	positive regulation of DNA metabolic process	-11.7429	-9.72095	25/243	142,672,983,1763,2187,2305,3014,4436,4751,5111,5591,5888,5984,5985,7468,8914,9212,10926,27101,79075,79733,79915,81620,144455,165918	PARP1,BRCA1,CDK1,DNA2,FANCB,FOXM1,H2AX,MSH2,NEK2,PCNA,PRKDC,RAD51,RFC4,RFC5,NSD2,TIMELESS,AURKB,DBF4,CACYBP,DSCC1,E2F8,ATAD5,CDT1,E2F7,RNF168
13_Summary	GO Biological Processes	GO:0044839	cell cycle G2/M phase transition	-23.2057	-20.8137	39/273	641,672,890,891,983,990,993,995,1019,1063,1111,2305,3161,4751,4998,5347,6502,6790,7157,7283,9088,9133,9212,9793,9833,9928,10733,11073,11200,22974,26271,51512,51514,55722,63967,79866,79915,90381,93323,4605,286826,347240,8541,255758,4851,25886,57216,83547,219844	BLM,BRCA1,CCNA2,CCNB1,CDK1,CDC6,CDC25A,CDC25C,CDK4,CENPF,CHEK1,FOXM1,HMMR,NEK2,ORC1,PLK1,SKP2,AURKA,TP53,TUBG1,PKMYT1,CCNB2,AURKB,CKAP5,MELK,KIF14,PLK4,TOPBP1,CHEK2,TPX2,FBXO5,GTSE1,DTL,CEP72,CLSPN,BORA,ATAD5,TICRR,HAUS8,MYBL2,LIN9,KIF24,PPFIA3,DYNLT2B,NOTCH1,POC1A,VANGL2,RILP,HYLS1
13_Member	GO Biological Processes	GO:0044839	cell cycle G2/M phase transition	-23.2057	-20.8137	39/273	641,672,890,891,983,990,993,995,1019,1063,1111,2305,3161,4751,4998,5347,6502,6790,7157,7283,9088,9133,9212,9793,9833,9928,10733,11073,11200,22974,26271,51512,51514,55722,63967,79866,79915,90381,93323	BLM,BRCA1,CCNA2,CCNB1,CDK1,CDC6,CDC25A,CDC25C,CDK4,CENPF,CHEK1,FOXM1,HMMR,NEK2,ORC1,PLK1,SKP2,AURKA,TP53,TUBG1,PKMYT1,CCNB2,AURKB,CKAP5,MELK,KIF14,PLK4,TOPBP1,CHEK2,TPX2,FBXO5,GTSE1,DTL,CEP72,CLSPN,BORA,ATAD5,TICRR,HAUS8
13_Member	GO Biological Processes	GO:0000086	G2/M transition of mitotic cell cycle	-20.3391	-18.0014	35/254	641,672,890,891,983,990,993,995,1019,1063,2305,3161,4751,4998,5347,6502,6790,7283,9088,9133,9212,9793,9833,9928,10733,11073,11200,22974,26271,51514,55722,63967,79866,90381,93323	BLM,BRCA1,CCNA2,CCNB1,CDK1,CDC6,CDC25A,CDC25C,CDK4,CENPF,FOXM1,HMMR,NEK2,ORC1,PLK1,SKP2,AURKA,TUBG1,PKMYT1,CCNB2,AURKB,CKAP5,MELK,KIF14,PLK4,TOPBP1,CHEK2,TPX2,FBXO5,DTL,CEP72,CLSPN,BORA,TICRR,HAUS8
13_Member	GO Biological Processes	GO:1902749	regulation of cell cycle G2/M phase transition	-18.5345	-16.2886	31/217	641,672,891,983,990,993,995,1019,1063,1111,3161,4751,4998,5347,6790,7157,7283,9212,9793,9928,10733,11073,22974,26271,51512,51514,55722,63967,79915,90381,93323	BLM,BRCA1,CCNB1,CDK1,CDC6,CDC25A,CDC25C,CDK4,CENPF,CHEK1,HMMR,NEK2,ORC1,PLK1,AURKA,TP53,TUBG1,AURKB,CKAP5,KIF14,PLK4,TOPBP1,TPX2,FBXO5,GTSE1,DTL,CEP72,CLSPN,ATAD5,TICRR,HAUS8
13_Member	GO Biological Processes	GO:0010389	regulation of G2/M transition of mitotic cell cycle	-15.5773	-13.4157	27/200	641,672,891,983,990,993,995,1019,1063,3161,4751,4998,5347,6790,7283,9212,9793,9928,10733,11073,22974,26271,51514,55722,63967,90381,93323	BLM,BRCA1,CCNB1,CDK1,CDC6,CDC25A,CDC25C,CDK4,CENPF,HMMR,NEK2,ORC1,PLK1,AURKA,TUBG1,AURKB,CKAP5,KIF14,PLK4,TOPBP1,TPX2,FBXO5,DTL,CEP72,CLSPN,TICRR,HAUS8
13_Member	Reactome Gene Sets	R-HSA-69275	G2/M Transition	-12.954	-10.8842	24/196	890,891,983,993,995,1063,2305,3161,4605,4751,5347,6790,7157,7283,9088,9133,9793,10733,22974,51512,55722,79866,93323,286826	CCNA2,CCNB1,CDK1,CDC25A,CDC25C,CENPF,FOXM1,HMMR,MYBL2,NEK2,PLK1,AURKA,TP53,TUBG1,PKMYT1,CCNB2,CKAP5,PLK4,TPX2,GTSE1,CEP72,BORA,HAUS8,LIN9
13_Member	Reactome Gene Sets	R-HSA-453274	Mitotic G2-G2/M phases	-12.8556	-10.7904	24/198	890,891,983,993,995,1063,2305,3161,4605,4751,5347,6790,7157,7283,9088,9133,9793,10733,22974,51512,55722,79866,93323,286826	CCNA2,CCNB1,CDK1,CDC25A,CDC25C,CENPF,FOXM1,HMMR,MYBL2,NEK2,PLK1,AURKA,TP53,TUBG1,PKMYT1,CCNB2,CKAP5,PLK4,TPX2,GTSE1,CEP72,BORA,HAUS8,LIN9
13_Member	Reactome Gene Sets	R-HSA-2565942	Regulation of PLK1 Activity at G2/M Transition	-7.31263	-5.47423	12/88	891,983,4751,5347,6790,7283,9133,9793,10733,55722,79866,93323	CCNB1,CDK1,NEK2,PLK1,AURKA,TUBG1,CCNB2,CKAP5,PLK4,CEP72,BORA,HAUS8
13_Member	Reactome Gene Sets	R-HSA-8854518	AURKA Activation by TPX2	-7.21161	-5.3759	11/73	983,3161,4751,5347,6790,7283,9793,10733,22974,55722,93323	CDK1,HMMR,NEK2,PLK1,AURKA,TUBG1,CKAP5,PLK4,TPX2,CEP72,HAUS8
13_Member	Reactome Gene Sets	R-HSA-380259	Loss of Nlp from mitotic centrosomes	-4.49266	-2.87718	8/70	983,4751,5347,7283,9793,10733,55722,93323	CDK1,NEK2,PLK1,TUBG1,CKAP5,PLK4,CEP72,HAUS8
13_Member	Reactome Gene Sets	R-HSA-380284	Loss of proteins required for interphase microtubule organization from the centrosome	-4.49266	-2.87718	8/70	983,4751,5347,7283,9793,10733,55722,93323	CDK1,NEK2,PLK1,TUBG1,CKAP5,PLK4,CEP72,HAUS8
13_Member	GO Biological Processes	GO:0097711	ciliary basal body-plasma membrane docking	-4.32492	-2.72296	9/95	983,4751,5347,7283,9793,10733,55722,93323,347240	CDK1,NEK2,PLK1,TUBG1,CKAP5,PLK4,CEP72,HAUS8,KIF24
13_Member	Reactome Gene Sets	R-HSA-5620912	Anchoring of the basal body to the plasma membrane	-4.21827	-2.63768	9/98	983,4751,5347,7283,9793,10733,55722,93323,347240	CDK1,NEK2,PLK1,TUBG1,CKAP5,PLK4,CEP72,HAUS8,KIF24
13_Member	Reactome Gene Sets	R-HSA-380270	Recruitment of mitotic centrosome proteins and complexes	-3.99576	-2.43412	8/82	983,4751,5347,7283,9793,10733,55722,93323	CDK1,NEK2,PLK1,TUBG1,CKAP5,PLK4,CEP72,HAUS8
13_Member	Reactome Gene Sets	R-HSA-380287	Centrosome maturation	-3.99576	-2.43412	8/82	983,4751,5347,7283,9793,10733,55722,93323	CDK1,NEK2,PLK1,TUBG1,CKAP5,PLK4,CEP72,HAUS8
13_Member	Reactome Gene Sets	R-HSA-380320	Recruitment of NuMA to mitotic centrosomes	-3.58102	-2.05694	8/94	983,4751,5347,7283,9793,10733,55722,93323	CDK1,NEK2,PLK1,TUBG1,CKAP5,PLK4,CEP72,HAUS8
13_Member	GO Biological Processes	GO:0140056	organelle localization by membrane tethering	-3.01625	-1.53687	10/171	983,4751,5347,7283,8541,9793,10733,55722,93323,347240	CDK1,NEK2,PLK1,TUBG1,PPFIA3,CKAP5,PLK4,CEP72,HAUS8,KIF24
13_Member	GO Biological Processes	GO:0022406	membrane docking	-2.84815	-1.39008	10/180	983,4751,5347,7283,8541,9793,10733,55722,93323,347240	CDK1,NEK2,PLK1,TUBG1,PPFIA3,CKAP5,PLK4,CEP72,HAUS8,KIF24
13_Member	Reactome Gene Sets	R-HSA-5617833	Cilium Assembly	-2.4982	-1.08493	10/201	983,4751,5347,7283,9793,10733,55722,93323,255758,347240	CDK1,NEK2,PLK1,TUBG1,CKAP5,PLK4,CEP72,HAUS8,DYNLT2B,KIF24
13_Member	GO Biological Processes	GO:0060271	cilium assembly	-2.23351	-0.853862	15/404	983,4751,4851,5347,7283,9793,10733,25886,55722,57216,83547,93323,219844,255758,347240	CDK1,NEK2,NOTCH1,PLK1,TUBG1,CKAP5,PLK4,POC1A,CEP72,VANGL2,RILP,HAUS8,HYLS1,DYNLT2B,KIF24
13_Member	GO Biological Processes	GO:0044782	cilium organization	-2.05024	-0.694325	15/424	983,4751,4851,5347,7283,9793,10733,25886,55722,57216,83547,93323,219844,255758,347240	CDK1,NEK2,NOTCH1,PLK1,TUBG1,CKAP5,PLK4,POC1A,CEP72,VANGL2,RILP,HAUS8,HYLS1,DYNLT2B,KIF24
14_Summary	Reactome Gene Sets	R-HSA-176974	Unwinding of DNA	-21.0975	-18.7469	12/12	4171,4172,4173,4174,4175,4176,8318,9837,51659,64785,84296,84515,675,3978,5888,11200,641,9401,4001	MCM2,MCM3,MCM4,MCM5,MCM6,MCM7,CDC45,GINS1,GINS2,GINS3,GINS4,MCM8,BRCA2,LIG1,RAD51,CHEK2,BLM,RECQL4,LMNB1
14_Member	Reactome Gene Sets	R-HSA-176974	Unwinding of DNA	-21.0975	-18.7469	12/12	4171,4172,4173,4174,4175,4176,8318,9837,51659,64785,84296,84515	MCM2,MCM3,MCM4,MCM5,MCM6,MCM7,CDC45,GINS1,GINS2,GINS3,GINS4,MCM8
14_Member	GO Biological Processes	GO:1902969	mitotic DNA replication	-13.7103	-11.612	10/16	675,3978,4171,4172,4173,4175,5888,8318,9837,11200	BRCA2,LIG1,MCM2,MCM3,MCM4,MCM6,RAD51,CDC45,GINS1,CHEK2
14_Member	GO Biological Processes	GO:0000727	double-strand break repair via break-induced replication	-13.4894	-11.4008	9/12	4171,4172,4173,4174,4175,4176,8318,51659,84296	MCM2,MCM3,MCM4,MCM5,MCM6,MCM7,CDC45,GINS2,GINS4
14_Member	CORUM	CORUM:387	MCM complex	-10.533	-8.55413	6/6	4171,4172,4173,4174,4175,4176	MCM2,MCM3,MCM4,MCM5,MCM6,MCM7
14_Member	GO Biological Processes	GO:0006267	pre-replicative complex assembly involved in nuclear cell cycle DNA replication	-9.09895	-7.18083	6/8	4171,4172,4173,4174,4175,4176	MCM2,MCM3,MCM4,MCM5,MCM6,MCM7
14_Member	GO Biological Processes	GO:0036388	pre-replicative complex assembly	-9.09895	-7.18083	6/8	4171,4172,4173,4174,4175,4176	MCM2,MCM3,MCM4,MCM5,MCM6,MCM7
14_Member	GO Biological Processes	GO:1902299	pre-replicative complex assembly involved in cell cycle DNA replication	-9.09895	-7.18083	6/8	4171,4172,4173,4174,4175,4176	MCM2,MCM3,MCM4,MCM5,MCM6,MCM7
14_Member	GO Biological Processes	GO:0006268	DNA unwinding involved in DNA replication	-8.29308	-6.41071	7/16	641,4171,4173,4175,4176,5888,9401	BLM,MCM2,MCM4,MCM6,MCM7,RAD51,RECQL4
14_Member	CORUM	CORUM:2792	MCM2-MCM4-MCM6-MCM7 complex	-7.01855	-5.20121	4/4	4171,4173,4175,4176	MCM2,MCM4,MCM6,MCM7
14_Member	CORUM	CORUM:1452	MCM2-MCM6-MCM7 complex	-5.26261	-3.56471	3/3	4171,4175,4176	MCM2,MCM6,MCM7
14_Member	CORUM	CORUM:2791	MCM4-MCM6-MCM7 complex	-5.26261	-3.56471	3/3	4173,4175,4176	MCM4,MCM6,MCM7
14_Member	GO Biological Processes	GO:1902292	cell cycle DNA replication initiation	-4.27411	-2.68351	3/5	4171,4172,4173	MCM2,MCM3,MCM4
14_Member	GO Biological Processes	GO:1902315	nuclear cell cycle DNA replication initiation	-4.27411	-2.68351	3/5	4171,4172,4173	MCM2,MCM3,MCM4
14_Member	GO Biological Processes	GO:1902975	mitotic DNA replication initiation	-4.27411	-2.68351	3/5	4171,4172,4173	MCM2,MCM3,MCM4
14_Member	CORUM	CORUM:5611	Emerin complex 24	-4.07921	-2.51327	4/14	4001,4171,4173,4175	LMNB1,MCM2,MCM4,MCM6
15_Summary	Canonical Pathways	M176	PID FOXM1 PATHWAY	-19.1396	-16.8652	17/40	332,675,890,891,898,983,1019,1029,1058,1063,2305,4751,5347,6502,9133,9212,11200,1111,6241,7157,51512,993,4605,286826,701,991,1031,4085,5111,5427,9232,9700,10714,3014,5591,9891,26271,1434,2956,4436,8438,27101,10919,11065,7020,5888,638,4851	BIRC5,BRCA2,CCNA2,CCNB1,CCNE1,CDK1,CDK4,CDKN2A,CENPA,CENPF,FOXM1,NEK2,PLK1,SKP2,CCNB2,AURKB,CHEK2,CHEK1,RRM2,TP53,GTSE1,CDC25A,MYBL2,LIN9,BUB1B,CDC20,CDKN2C,MAD2L1,PCNA,POLE2,PTTG1,ESPL1,POLD3,H2AX,PRKDC,NUAK1,FBXO5,CSE1L,MSH6,MSH2,RAD54L,CACYBP,EHMT2,UBE2C,TFAP2A,RAD51,BIK,NOTCH1
15_Member	Canonical Pathways	M176	PID FOXM1 PATHWAY	-19.1396	-16.8652	17/40	332,675,890,891,898,983,1019,1029,1058,1063,2305,4751,5347,6502,9133,9212,11200	BIRC5,BRCA2,CCNA2,CCNB1,CCNE1,CDK1,CDK4,CDKN2A,CENPA,CENPF,FOXM1,NEK2,PLK1,SKP2,CCNB2,AURKB,CHEK2
15_Member	KEGG Pathway	ko04115	p53 signaling pathway	-7.47434	-5.62777	11/69	891,898,983,1019,1029,1111,6241,7157,9133,11200,51512	CCNB1,CCNE1,CDK1,CDK4,CDKN2A,CHEK1,RRM2,TP53,CCNB2,CHEK2,GTSE1
15_Member	KEGG Pathway	hsa04115	p53 signaling pathway	-6.84818	-5.0435	11/79	891,898,983,1019,1029,1111,6241,7157,9133,11200,51512	CCNB1,CCNE1,CDK1,CDK4,CDKN2A,CHEK1,RRM2,TP53,CCNB2,CHEK2,GTSE1
15_Member	KEGG Pathway	hsa04218	cellular senescence	-5.57884	-3.84324	14/173	890,891,898,983,993,1019,1029,1111,2305,4605,7157,9133,11200,286826	CCNA2,CCNB1,CCNE1,CDK1,CDC25A,CDK4,CDKN2A,CHEK1,FOXM1,MYBL2,TP53,CCNB2,CHEK2,LIN9
15_Member	KEGG Pathway	hsa05166	Human T-cell leukemia virus 1 infection	-5.22284	-3.53076	18/295	701,890,898,991,1019,1029,1031,1111,4085,4605,5111,5427,7157,9133,9232,9700,10714,11200	BUB1B,CCNA2,CCNE1,CDC20,CDK4,CDKN2A,CDKN2C,CHEK1,MAD2L1,MYBL2,PCNA,POLE2,TP53,CCNB2,PTTG1,ESPL1,POLD3,CHEK2
15_Member	GO Biological Processes	GO:0007569	cell aging	-5.09133	-3.41625	11/118	675,983,1029,1111,2305,3014,5591,7157,9891,11200,26271	BRCA2,CDK1,CDKN2A,CHEK1,FOXM1,H2AX,PRKDC,TP53,NUAK1,CHEK2,FBXO5
15_Member	KEGG Pathway	ko05166	HTLV-I infection	-4.2512	-2.6659	15/256	701,991,1019,1029,1031,1111,4085,4605,5111,5427,7157,9133,9232,10714,11200	BUB1B,CDC20,CDK4,CDKN2A,CDKN2C,CHEK1,MAD2L1,MYBL2,PCNA,POLE2,TP53,CCNB2,PTTG1,POLD3,CHEK2
15_Member	Canonical Pathways	M261	PID P53 REGULATION PATHWAY	-4.10312	-2.53066	7/59	890,1029,1111,1434,6502,7157,11200	CCNA2,CDKN2A,CHEK1,CSE1L,SKP2,TP53,CHEK2
15_Member	GO Biological Processes	GO:0090399	replicative senescence	-4.07921	-2.51327	4/14	1029,1111,7157,11200	CDKN2A,CHEK1,TP53,CHEK2
15_Member	Reactome Gene Sets	R-HSA-69615	G1/S DNA Damage Checkpoints	-3.70873	-2.17871	7/68	890,898,993,1029,1111,7157,11200	CCNA2,CCNE1,CDC25A,CDKN2A,CHEK1,TP53,CHEK2
15_Member	GO Biological Processes	GO:0007568	aging	-3.70599	-2.1773	16/319	675,983,1029,1111,2305,2956,3014,4436,5591,7157,8438,9212,9891,11200,26271,27101	BRCA2,CDK1,CDKN2A,CHEK1,FOXM1,MSH6,H2AX,MSH2,PRKDC,TP53,RAD54L,AURKB,NUAK1,CHEK2,FBXO5,CACYBP
15_Member	Reactome Gene Sets	R-HSA-6804757	Regulation of TP53 Degradation	-3.39527	-1.88849	5/36	890,983,1029,7157,11200	CCNA2,CDK1,CDKN2A,TP53,CHEK2
15_Member	Reactome Gene Sets	R-HSA-6806003	Regulation of TP53 Expression and Degradation	-3.3385	-1.83797	5/37	890,983,1029,7157,11200	CCNA2,CDK1,CDKN2A,TP53,CHEK2
15_Member	GO Biological Processes	GO:0090342	regulation of cell aging	-3.14526	-1.65694	6/61	1029,2305,5591,7157,9891,26271	CDKN2A,FOXM1,PRKDC,TP53,NUAK1,FBXO5
15_Member	Canonical Pathways	M1529	SA G1 AND S PHASES	-2.67328	-1.23498	3/15	1019,1029,7157	CDK4,CDKN2A,TP53
15_Member	GO Biological Processes	GO:2000772	regulation of cellular senescence	-2.62027	-1.18624	5/53	1029,5591,7157,9891,26271	CDKN2A,PRKDC,TP53,NUAK1,FBXO5
15_Member	Reactome Gene Sets	R-HSA-2559585	Oncogene Induced Senescence	-2.58279	-1.15614	4/33	1019,1029,1031,7157	CDK4,CDKN2A,CDKN2C,TP53
15_Member	GO Biological Processes	GO:0090398	cellular senescence	-2.5611	-1.13705	6/79	1029,3014,5591,7157,9891,26271	CDKN2A,H2AX,PRKDC,TP53,NUAK1,FBXO5
15_Member	Reactome Gene Sets	R-HSA-6804760	Regulation of TP53 Activity through Methylation	-2.3677	-0.971326	3/19	7157,10919,11200	TP53,EHMT2,CHEK2
15_Member	Reactome Gene Sets	R-HSA-8853884	Transcriptional Regulation by VENTX	-2.31565	-0.925083	4/39	1029,7157,10919,11065	CDKN2A,TP53,EHMT2,UBE2C
15_Member	Reactome Gene Sets	R-HSA-3232118	SUMOylation of transcription factors	-2.30279	-0.914623	3/20	1029,7020,7157	CDKN2A,TFAP2A,TP53
15_Member	KEGG Pathway	ko05212	Pancreatic cancer	-2.26436	-0.880948	5/64	675,1019,1029,5888,7157	BRCA2,CDK4,CDKN2A,RAD51,TP53
15_Member	Reactome Gene Sets	R-HSA-69563	p53-Dependent G1 DNA Damage Response	-2.20779	-0.830488	5/66	890,898,1029,7157,11200	CCNA2,CCNE1,CDKN2A,TP53,CHEK2
15_Member	Reactome Gene Sets	R-HSA-69580	p53-Dependent G1/S DNA damage checkpoint	-2.20779	-0.830488	5/66	890,898,1029,7157,11200	CCNA2,CCNE1,CDKN2A,TP53,CHEK2
15_Member	KEGG Pathway	hsa01522	Endocrine resistance	-2.14621	-0.776301	6/96	638,1019,1029,1031,4851,7157	BIK,CDK4,CDKN2A,CDKN2C,NOTCH1,TP53
15_Member	KEGG Pathway	ko01522	Endocrine resistance	-2.14621	-0.776301	6/96	638,1019,1029,1031,4851,7157	BIK,CDK4,CDKN2A,CDKN2C,NOTCH1,TP53

## Sheet: Supplemental Table 6
Supplemental Table 6. Enriched child GO terms of the immune System process pathway by Metascape with genes in MEyellow module.
Category	CategoryID	GO	Description	PARENT_GO	LogP	Enrichment	Z-score	#TotalGeneInLibrary	#GeneInGO	#GeneInHitList	#GeneInGOAndHitList	%InGO	STDV %InGO	GeneID	Hits	Log(q-value)
GO Biological Processes	19	GO:0002200	somatic diversification of immune receptors	19_GO:0002376 immune system process	-5.9	7.2	7.4	27994	79	494	10	2	0.63	2956|3978|4436|5591|7374|7468|9156|10721|79915|165918	MSH6|LIG1|MSH2|PRKDC|UNG|NSD2|EXO1|POLQ|ATAD5|RNF168	-4.1
GO Biological Processes	19	GO:0016445	somatic diversification of immunoglobulins	19_GO:0002376 immune system process	-5.6	7.7	7.3	27994	66	494	9	1.8	0.6	2956|4436|5591|7374|7468|9156|10721|79915|165918	MSH6|MSH2|PRKDC|UNG|NSD2|EXO1|POLQ|ATAD5|RNF168	-3.9
GO Biological Processes	19	GO:0002562	somatic diversification of immune receptors via germline recombination within a single locus	19_GO:0002376 immune system process	-5.5	7.5	7.2	27994	68	494	9	1.8	0.6	2956|3978|4436|5591|7374|7468|9156|79915|165918	MSH6|LIG1|MSH2|PRKDC|UNG|NSD2|EXO1|ATAD5|RNF168	-3.8
GO Biological Processes	19	GO:0016447	somatic recombination of immunoglobulin gene segments	19_GO:0002376 immune system process	-5.2	8.1	7.1	27994	56	494	8	1.6	0.57	2956|4436|5591|7374|7468|9156|79915|165918	MSH6|MSH2|PRKDC|UNG|NSD2|EXO1|ATAD5|RNF168	-3.5
GO Biological Processes	19	GO:0016446	somatic hypermutation of immunoglobulin genes	19_GO:0002376 immune system process	-5.2	18	9	27994	16	494	5	1	0.45	2956|4436|7374|9156|10721	MSH6|MSH2|UNG|EXO1|POLQ	-3.5
GO Biological Processes	19	GO:0002566	somatic diversification of immune receptors via somatic mutation	19_GO:0002376 immune system process	-5.1	17	8.7	27994	17	494	5	1	0.45	2956|4436|7374|9156|10721	MSH6|MSH2|UNG|EXO1|POLQ	-3.4
GO Biological Processes	19	GO:0019886	antigen processing and presentation of exogenous peptide antigen via MHC class II	19_GO:0002376 immune system process	-5	5.7	6.3	27994	99	494	10	2	0.63	1062|3832|3835|9493|11004|24137|29127|56992|81930|83547	CENPE|KIF11|KIF22|KIF23|KIF2C|KIF4A|RACGAP1|KIF15|KIF18A|RILP	-3.3
GO Biological Processes	19	GO:0002381	immunoglobulin production involved in immunoglobulin mediated immune response	19_GO:0002376 immune system process	-4.9	7.4	6.7	27994	61	494	8	1.6	0.57	2956|4436|6375|7374|7468|9156|79915|165918	MSH6|MSH2|XCL1|UNG|NSD2|EXO1|ATAD5|RNF168	-3.3
GO Biological Processes	19	GO:0002495	antigen processing and presentation of peptide antigen via MHC class II	19_GO:0002376 immune system process	-4.8	5.5	6.1	27994	103	494	10	2	0.63	1062|3832|3835|9493|11004|24137|29127|56992|81930|83547	CENPE|KIF11|KIF22|KIF23|KIF2C|KIF4A|RACGAP1|KIF15|KIF18A|RILP	-3.2
GO Biological Processes	19	GO:0002504	antigen processing and presentation of peptide or polysaccharide antigen via MHC class II	19_GO:0002376 immune system process	-4.8	5.4	6.1	27994	104	494	10	2	0.63	1062|3832|3835|9493|11004|24137|29127|56992|81930|83547	CENPE|KIF11|KIF22|KIF23|KIF2C|KIF4A|RACGAP1|KIF15|KIF18A|RILP	-3.2
GO Biological Processes	19	GO:0002208	somatic diversification of immunoglobulins involved in immune response	19_GO:0002376 immune system process	-4.5	7.8	6.5	27994	51	494	7	1.4	0.53	2956|4436|7374|7468|9156|79915|165918	MSH6|MSH2|UNG|NSD2|EXO1|ATAD5|RNF168	-2.9
GO Biological Processes	19	GO:0002204	somatic recombination of immunoglobulin genes involved in immune response	19_GO:0002376 immune system process	-4.5	7.8	6.5	27994	51	494	7	1.4	0.53	2956|4436|7374|7468|9156|79915|165918	MSH6|MSH2|UNG|NSD2|EXO1|ATAD5|RNF168	-2.9
GO Biological Processes	19	GO:0045190	isotype switching	19_GO:0002376 immune system process	-4.5	7.8	6.5	27994	51	494	7	1.4	0.53	2956|4436|7374|7468|9156|79915|165918	MSH6|MSH2|UNG|NSD2|EXO1|ATAD5|RNF168	-2.9
GO Biological Processes	19	GO:0002312	B cell activation involved in immune response	19_GO:0002376 immune system process	-3.3	5	4.8	27994	80	494	7	1.4	0.53	2956|4436|7374|7468|9156|79915|165918	MSH6|MSH2|UNG|NSD2|EXO1|ATAD5|RNF168	-1.8
GO Biological Processes	19	GO:0002328	pro-B cell differentiation	19_GO:0002376 immune system process	-3.1	15	6.4	27994	11	494	3	0.61	0.35	4851|5591|6659	NOTCH1|PRKDC|SOX4	-1.6
GO Biological Processes	19	GO:0002478	antigen processing and presentation of exogenous peptide antigen	19_GO:0002376 immune system process	-2.9	3.2	3.9	27994	177	494	10	2	0.63	1062|3832|3835|9493|11004|24137|29127|56992|81930|83547	CENPE|KIF11|KIF22|KIF23|KIF2C|KIF4A|RACGAP1|KIF15|KIF18A|RILP	-1.4
GO Biological Processes	19	GO:0019884	antigen processing and presentation of exogenous antigen	19_GO:0002376 immune system process	-2.8	3.1	3.8	27994	185	494	10	2	0.63	1062|3832|3835|9493|11004|24137|29127|56992|81930|83547	CENPE|KIF11|KIF22|KIF23|KIF2C|KIF4A|RACGAP1|KIF15|KIF18A|RILP	-1.3
GO Biological Processes	19	GO:0045589	regulation of regulatory T cell differentiation	19_GO:0002376 immune system process	-2.6	7.1	4.6	27994	32	494	4	0.81	0.4	2175|2177|4192|6666	FANCA|FANCD2|MDK|SOX12	-1.2
GO Biological Processes	19	GO:0048002	antigen processing and presentation of peptide antigen	19_GO:0002376 immune system process	-2.6	2.9	3.6	27994	194	494	10	2	0.63	1062|3832|3835|9493|11004|24137|29127|56992|81930|83547	CENPE|KIF11|KIF22|KIF23|KIF2C|KIF4A|RACGAP1|KIF15|KIF18A|RILP	-1.2
GO Biological Processes	19	GO:0045066	regulatory T cell differentiation	19_GO:0002376 immune system process	-2.5	6.5	4.3	27994	35	494	4	0.81	0.4	2175|2177|4192|6666	FANCA|FANCD2|MDK|SOX12	-1.1
GO Biological Processes	19	GO:0002377	immunoglobulin production	19_GO:0002376 immune system process	-2.3	2.7	3.3	27994	211	494	10	2	0.63	2956|4436|5591|6375|7374|7468|9156|10721|79915|165918	MSH6|MSH2|PRKDC|XCL1|UNG|NSD2|EXO1|POLQ|ATAD5|RNF168	-0.96
GO Biological Processes	19	GO:0002320	lymphoid progenitor cell differentiation	19_GO:0002376 immune system process	-2.3	8.5	4.5	27994	20	494	3	0.61	0.35	4851|5591|6659	NOTCH1|PRKDC|SOX4	-0.91
GO Biological Processes	19	GO:0002714	positive regulation of B cell mediated immunity	19_GO:0002376 immune system process	-2.3	5.7	4	27994	40	494	4	0.81	0.4	4436|6375|7468|79915	MSH2|XCL1|NSD2|ATAD5	-0.89
GO Biological Processes	19	GO:0002891	positive regulation of immunoglobulin mediated immune response	19_GO:0002376 immune system process	-2.3	5.7	4	27994	40	494	4	0.81	0.4	4436|6375|7468|79915	MSH2|XCL1|NSD2|ATAD5	-0.89
GO Biological Processes	19	GO:0002285	lymphocyte activation involved in immune response	19_GO:0002376 immune system process	-2.2	2.7	3.2	27994	188	494	9	1.8	0.6	2956|4192|4436|7157|7374|7468|9156|79915|165918	MSH6|MDK|MSH2|TP53|UNG|NSD2|EXO1|ATAD5|RNF168	-0.82
GO Biological Processes	19	GO:0002637	regulation of immunoglobulin production	19_GO:0002376 immune system process	-2.1	4.1	3.5	27994	69	494	5	1	0.45	4436|5591|6375|7468|79915	MSH2|PRKDC|XCL1|NSD2|ATAD5	-0.76
GO Biological Processes	19	GO:0019882	antigen processing and presentation	19_GO:0002376 immune system process	-2.1	2.4	3	27994	232	494	10	2	0.63	1062|3832|3835|9493|11004|24137|29127|56992|81930|83547	CENPE|KIF11|KIF22|KIF23|KIF2C|KIF4A|RACGAP1|KIF15|KIF18A|RILP	-0.71
GO Biological Processes	19	GO:0002639	positive regulation of immunoglobulin production	19_GO:0002376 immune system process	-2.1	4.9	3.6	27994	46	494	4	0.81	0.4	4436|6375|7468|79915	MSH2|XCL1|NSD2|ATAD5	-0.7

## Sheet: Supplemental Table 7
Supplemental Table 7. Gene pair list and correlation in TF-iGENs.
geneA_id	geneB_id	correlation	pvalue	geneA	geneB	geneA_tf_type	geneAtf_type	module	geneA_immune_type	geneA_immune_type	geneA_LM22_type	geneA_LM22_type	geneA_connection_number	geneB_connection_number	is in encode	is in trrust
ENSG00000095002.13	ENSG00000116062.14	0.884875	2.77576e-34	MSH2	MSH6	-	-	yellow	immune	immune	-	-	344	362	0	0
ENSG00000164045.11	ENSG00000154839.9	0.838423	1.40708e-27	CDC25A	SKA1	-	-	yellow	-	-	LM22	LM22	362	341	0	0
ENSG00000101057.15	ENSG00000111206.12	0.836766	2.22422e-27	MYBL2	FOXM1	TF	TF	yellow	-	-	-	-	351	337	1	0
ENSG00000076248.10	ENSG00000085840.12	0.831387	9.49203e-27	UNG	ORC1	-	-	yellow	immune	-	-	LM22	350	341	0	0
ENSG00000076248.10	ENSG00000116062.14	0.818409	2.57427e-25	UNG	MSH6	-	-	yellow	immune	immune	-	-	350	362	0	0
ENSG00000164045.11	ENSG00000111206.12	0.815177	5.62114e-25	CDC25A	FOXM1	-	TF	yellow	-	-	LM22	-	362	337	1	1
ENSG00000101057.15	ENSG00000154839.9	0.802063	1.15136e-23	MYBL2	SKA1	TF	-	yellow	-	-	-	LM22	351	341	1	0
ENSG00000164045.11	ENSG00000085840.12	0.800833	1.51063e-23	CDC25A	ORC1	-	-	yellow	-	-	LM22	LM22	362	341	0	0
ENSG00000154839.9	ENSG00000095002.13	0.790866	1.27475e-22	SKA1	MSH2	-	-	yellow	-	immune	LM22	-	341	344	0	0
ENSG00000076248.10	ENSG00000095002.13	0.788963	1.89078e-22	UNG	MSH2	-	-	yellow	immune	immune	-	-	350	344	0	0
ENSG00000085840.12	ENSG00000111206.12	0.775241	2.88879e-21	ORC1	FOXM1	-	TF	yellow	-	-	LM22	-	341	337	1	0
ENSG00000085840.12	ENSG00000116062.14	0.770725	6.79655e-21	ORC1	MSH6	-	-	yellow	-	immune	LM22	-	341	362	0	0
ENSG00000101057.15	ENSG00000085840.12	0.767467	1.24489e-20	MYBL2	ORC1	TF	-	yellow	-	-	-	LM22	351	341	1	0
ENSG00000164045.11	ENSG00000116062.14	0.765727	1.71296e-20	CDC25A	MSH6	-	-	yellow	-	immune	LM22	-	362	362	0	0
ENSG00000101057.15	ENSG00000076248.10	0.761816	3.47566e-20	MYBL2	UNG	TF	-	yellow	-	immune	-	-	351	350	1	0
ENSG00000101057.15	ENSG00000116062.14	0.756502	8.89838e-20	MYBL2	MSH6	TF	-	yellow	-	immune	-	-	351	362	1	0
ENSG00000164045.11	ENSG00000076248.10	0.747143	4.39992e-19	CDC25A	UNG	-	-	yellow	-	immune	LM22	-	362	350	0	0
ENSG00000154839.9	ENSG00000116062.14	0.742628	9.27963e-19	SKA1	MSH6	-	-	yellow	-	immune	LM22	-	341	362	0	0
ENSG00000154839.9	ENSG00000085840.12	0.733843	3.79469e-18	SKA1	ORC1	-	-	yellow	-	-	LM22	LM22	341	341	0	0
ENSG00000101057.15	ENSG00000164045.11	0.73353	3.98608e-18	MYBL2	CDC25A	TF	-	yellow	-	-	-	LM22	351	362	1	0
ENSG00000076248.10	ENSG00000111206.12	0.731976	5.08308e-18	UNG	FOXM1	-	TF	yellow	immune	-	-	-	350	337	1	0
ENSG00000101057.15	ENSG00000095002.13	0.729021	8.03127e-18	MYBL2	MSH2	TF	-	yellow	-	immune	-	-	351	344	1	0
ENSG00000076248.10	ENSG00000154839.9	0.72716	1.06799e-17	UNG	SKA1	-	-	yellow	immune	-	-	LM22	350	341	0	0
ENSG00000164045.11	ENSG00000095002.13	0.724475	1.60493e-17	CDC25A	MSH2	-	-	yellow	-	immune	LM22	-	362	344	0	0
ENSG00000154839.9	ENSG00000111206.12	0.722295	2.22571e-17	SKA1	FOXM1	-	TF	yellow	-	-	LM22	-	341	337	1	0
ENSG00000085840.12	ENSG00000095002.13	0.702671	3.69967e-16	ORC1	MSH2	-	-	yellow	-	immune	LM22	-	341	344	0	0
ENSG00000111206.12	ENSG00000116062.14	0.68793	2.64063e-15	FOXM1	MSH6	TF	-	yellow	-	immune	-	-	337	362	1	0
ENSG00000085840.12	ENSG00000096063.15	0.68395	4.40088e-15	ORC1	SRPK1	-	-	yellow	-	immune	LM22	-	341	216	0	0
ENSG00000076248.10	ENSG00000096063.15	0.682522	5.27593e-15	UNG	SRPK1	-	-	yellow	immune	immune	-	-	350	216	0	0
ENSG00000164045.11	ENSG00000096063.15	0.646817	3.59908e-13	CDC25A	SRPK1	-	-	yellow	-	immune	LM22	-	362	216	0	0
ENSG00000101057.15	ENSG00000029993.14	0.637514	9.88392e-13	MYBL2	HMGB3	TF	TF	yellow	-	immune	-	-	351	96	0	0
ENSG00000096063.15	ENSG00000111206.12	0.634867	1.30943e-12	SRPK1	FOXM1	-	TF	yellow	immune	-	-	-	216	337	1	0
ENSG00000096063.15	ENSG00000095002.13	0.62896	2.429e-12	SRPK1	MSH2	-	-	yellow	immune	immune	-	-	216	344	0	0
ENSG00000101057.15	ENSG00000096063.15	0.620306	5.86704e-12	MYBL2	SRPK1	TF	-	yellow	-	immune	-	-	351	216	1	0
ENSG00000029993.14	ENSG00000116062.14	0.620026	6.03445e-12	HMGB3	MSH6	TF	-	yellow	immune	immune	-	-	96	362	0	0
ENSG00000085840.12	ENSG00000141510.16	0.605618	2.4672e-11	ORC1	TP53	-	TF	yellow	-	immune	LM22	-	341	9	0	0
ENSG00000111206.12	ENSG00000095002.13	0.603916	2.90032e-11	FOXM1	MSH2	TF	-	yellow	-	immune	-	-	337	344	1	0
ENSG00000157554.18	ENSG00000162367.11	0.892218	1.31822e-35	ERG	TAL1	TF	TF	blue	-	-	-	-	461	513	0	1
ENSG00000162367.11	ENSG00000137486.16	0.820982	1.36696e-25	TAL1	ARRB1	TF	-	blue	-	-	-	LM22	513	381	1	0
ENSG00000162367.11	ENSG00000108622.10	0.806733	4.03381e-24	TAL1	ICAM2	TF	-	blue	-	immune	-	-	513	354	1	0
ENSG00000078401.6	ENSG00000162367.11	0.80022	1.72825e-23	EDN1	TAL1	-	TF	blue	immune	-	-	-	249	513	1	0
ENSG00000157554.18	ENSG00000124019.9	0.792831	8.44936e-23	ERG	FAM124B	TF	-	blue	-	-	-	LM22	461	307	0	0
ENSG00000162367.11	ENSG00000124019.9	0.790727	1.31217e-22	TAL1	FAM124B	TF	-	blue	-	-	-	LM22	513	307	1	0
ENSG00000157554.18	ENSG00000078401.6	0.780064	1.13286e-21	ERG	EDN1	TF	-	blue	-	immune	-	-	461	249	0	0
ENSG00000108622.10	ENSG00000137486.16	0.767943	1.14021e-20	ICAM2	ARRB1	-	-	blue	immune	-	-	LM22	354	381	0	0
ENSG00000157554.18	ENSG00000108622.10	0.767487	1.24032e-20	ERG	ICAM2	TF	-	blue	-	immune	-	-	461	354	0	1
ENSG00000157554.18	ENSG00000137486.16	0.749499	2.96169e-19	ERG	ARRB1	TF	-	blue	-	-	-	LM22	461	381	0	0
ENSG00000108622.10	ENSG00000124019.9	0.729815	7.10675e-18	ICAM2	FAM124B	-	-	blue	immune	-	-	LM22	354	307	0	0
ENSG00000018280.16	ENSG00000162367.11	0.728506	8.69325e-18	SLC11A1	TAL1	-	TF	blue	immune	-	-	-	321	513	1	0
ENSG00000160013.8	ENSG00000162367.11	0.725719	1.32963e-17	PTGIR	TAL1	-	TF	blue	-	-	LM22	-	221	513	1	0
ENSG00000078401.6	ENSG00000137486.16	0.722072	2.30124e-17	EDN1	ARRB1	-	-	blue	immune	-	-	LM22	249	381	0	0
ENSG00000160013.8	ENSG00000108622.10	0.718035	4.18031e-17	PTGIR	ICAM2	-	-	blue	-	immune	LM22	-	221	354	0	0
ENSG00000160013.8	ENSG00000124019.9	0.715387	6.15002e-17	PTGIR	FAM124B	-	-	blue	-	-	LM22	LM22	221	307	0	0
ENSG00000157554.18	ENSG00000160013.8	0.707996	1.76543e-16	ERG	PTGIR	TF	-	blue	-	-	-	LM22	461	221	0	0
ENSG00000157554.18	ENSG00000018280.16	0.702888	3.59104e-16	ERG	SLC11A1	TF	-	blue	-	immune	-	-	461	321	0	0
ENSG00000137486.16	ENSG00000124019.9	0.696193	8.9033e-16	ARRB1	FAM124B	-	-	blue	-	-	LM22	LM22	381	307	0	0
ENSG00000018280.16	ENSG00000027697.13	0.691237	1.71651e-15	SLC11A1	IFNGR1	-	-	blue	immune	immune	-	-	321	243	0	0
ENSG00000157554.18	ENSG00000027697.13	0.689663	2.1084e-15	ERG	IFNGR1	TF	-	blue	-	immune	-	-	461	243	0	0
ENSG00000018280.16	ENSG00000137486.16	0.674043	1.51667e-14	SLC11A1	ARRB1	-	-	blue	immune	-	-	LM22	321	381	0	0
ENSG00000162367.11	ENSG00000027697.13	0.671084	2.17448e-14	TAL1	IFNGR1	TF	-	blue	-	immune	-	-	513	243	1	0
ENSG00000155962.12	ENSG00000107742.12	0.670587	2.30931e-14	CLIC2	SPOCK2	-	-	blue	-	-	LM22	LM22	165	96	0	0
ENSG00000018280.16	ENSG00000160013.8	0.665741	4.12548e-14	SLC11A1	PTGIR	-	-	blue	immune	-	-	LM22	321	221	0	0
ENSG00000108622.10	ENSG00000155962.12	0.653329	1.73777e-13	ICAM2	CLIC2	-	-	blue	immune	-	-	LM22	354	165	0	0
ENSG00000157554.18	ENSG00000131759.17	0.652464	1.91617e-13	ERG	RARA	TF	TF	blue	-	immune	-	-	461	89	0	0
ENSG00000018280.16	ENSG00000108622.10	0.646995	3.52916e-13	SLC11A1	ICAM2	-	-	blue	immune	immune	-	-	321	354	0	0
ENSG00000157554.18	ENSG00000155962.12	0.643805	5.01063e-13	ERG	CLIC2	TF	-	blue	-	-	-	LM22	461	165	0	0
ENSG00000137486.16	ENSG00000027697.13	0.633611	1.4949e-12	ARRB1	IFNGR1	-	-	blue	-	immune	LM22	-	381	243	0	0
ENSG00000018280.16	ENSG00000124019.9	0.633308	1.54335e-12	SLC11A1	FAM124B	-	-	blue	immune	-	-	LM22	321	307	0	0
ENSG00000108622.10	ENSG00000027697.13	0.631169	1.93069e-12	ICAM2	IFNGR1	-	-	blue	immune	immune	-	-	354	243	0	0
ENSG00000124019.9	ENSG00000027697.13	0.631118	1.94117e-12	FAM124B	IFNGR1	-	-	blue	-	immune	LM22	-	307	243	0	0
ENSG00000131759.17	ENSG00000027697.13	0.629287	2.34811e-12	RARA	IFNGR1	TF	-	blue	immune	immune	-	-	89	243	0	0
ENSG00000078401.6	ENSG00000027697.13	0.629202	2.36874e-12	EDN1	IFNGR1	-	-	blue	immune	immune	-	-	249	243	0	0
ENSG00000162367.11	ENSG00000155962.12	0.625743	3.38209e-12	TAL1	CLIC2	TF	-	blue	-	-	-	LM22	513	165	1	0
ENSG00000160013.8	ENSG00000137486.16	0.621847	5.02434e-12	PTGIR	ARRB1	-	-	blue	-	-	LM22	LM22	221	381	0	0
ENSG00000018280.16	ENSG00000131759.17	0.613003	1.20949e-11	SLC11A1	RARA	-	TF	blue	immune	immune	-	-	321	89	0	0
ENSG00000162367.11	ENSG00000107742.12	0.609266	1.73896e-11	TAL1	SPOCK2	TF	-	blue	-	-	-	LM22	513	96	1	0
ENSG00000078401.6	ENSG00000108622.10	0.606622	2.24183e-11	EDN1	ICAM2	-	-	blue	immune	immune	-	-	249	354	0	0
ENSG00000131759.17	ENSG00000090339.8	0.603602	2.98789e-11	RARA	ICAM1	TF	-	blue	immune	immune	-	-	89	52	0	1

## Sheet: Supplemental Table 8
Supplemental Table 8. Top15 enrichment pathways by Metascape with genes in MEblue module.
GroupID	Category	Term	Description	LogP	Log(q-value)	InTerm_InList	Genes	Symbols
1_Summary	GO Biological Processes	GO:0001568	blood vessel development	-24.6062	-20.2816	78/794	14,94,240,284,306,358,857,947,1003,1285,1524,1901,1906,2013,2022,2034,2277,2324,2348,2701,3037,3082,3491,4091,4223,4628,4855,4881,5168,5175,5196,5468,5743,5787,6092,6505,6886,6910,6943,7010,7048,7075,7122,7472,8322,8817,8862,9037,9353,9496,9723,10203,10266,10268,10365,23328,28984,51162,54345,54538,54922,55273,56999,57381,57493,57608,64344,79625,79812,83478,90627,147372,161198,168667,221395,406888…	AAMP,ACVRL1,ALOX5,ANGPT1,ANXA3,AQP1,CAV1,CD34,CDH5,COL4A3,CX3CR1,S1PR1,EDN1,EMP2,ENG,EPAS1,VEGFD,FLT4,FOLR1,GJA4,HAS2,HGF,CCN1,SMAD6,MEOX2,MYH10,NOTCH4,NPR1,ENPP2,PECAM1,PF4,PPARG,PTGS2,PTPRB,ROBO2,SLC1A1,TAL1,TBX5,TCF21,TEK,TGFBR2,TIE1,CLDN5,WNT2,FZD4,FGF18,APLN,SEMA5A,SLIT2,TBX4,SEMA3E,CALCRL,RAMP2,RAMP3,KLF2,SASH1,RGCC,EGFL7,SOX18,ROBO4,RASIP1,TMEM100,ADAMTS9,RHOJ,HEG1,JCAD,HIF3A,NDNF,MMRN2,AR…
1_Member	GO Biological Processes	GO:0001568	blood vessel development	-24.6062	-20.2816	78/794	14,94,240,284,306,358,857,947,1003,1285,1524,1901,1906,2013,2022,2034,2277,2324,2348,2701,3037,3082,3491,4091,4223,4628,4855,4881,5168,5175,5196,5468,5743,5787,6092,6505,6886,6910,6943,7010,7048,7075,7122,7472,8322,8817,8862,9037,9353,9496,9723,10203,10266,10268,10365,23328,28984,51162,54345,54538,54922,55273,56999,57381,57493,57608,64344,79625,79812,83478,90627,147372,161198,168667,221395,406888…	AAMP,ACVRL1,ALOX5,ANGPT1,ANXA3,AQP1,CAV1,CD34,CDH5,COL4A3,CX3CR1,S1PR1,EDN1,EMP2,ENG,EPAS1,VEGFD,FLT4,FOLR1,GJA4,HAS2,HGF,CCN1,SMAD6,MEOX2,MYH10,NOTCH4,NPR1,ENPP2,PECAM1,PF4,PPARG,PTGS2,PTPRB,ROBO2,SLC1A1,TAL1,TBX5,TCF21,TEK,TGFBR2,TIE1,CLDN5,WNT2,FZD4,FGF18,APLN,SEMA5A,SLIT2,TBX4,SEMA3E,CALCRL,RAMP2,RAMP3,KLF2,SASH1,RGCC,EGFL7,SOX18,ROBO4,RASIP1,TMEM100,ADAMTS9,RHOJ,HEG1,JCAD,HIF3A,NDNF,MMRN2,AR…
1_Member	GO Biological Processes	GO:0048514	blood vessel morphogenesis	-24.3268	-20.2816	73/707	14,94,240,284,306,358,857,947,1003,1285,1524,1901,1906,2013,2022,2034,2277,2324,2348,3037,3082,3491,4223,4855,4881,5168,5175,5196,5468,5743,5787,6505,6886,6910,6943,7010,7048,7075,7122,8322,8817,8862,9037,9353,9496,9723,10203,10266,10268,10365,23328,28984,51162,54345,54538,54922,55273,56999,57381,57493,57608,64344,79625,79812,83478,90627,147372,161198,168667,221395,406888,406913,641700	AAMP,ACVRL1,ALOX5,ANGPT1,ANXA3,AQP1,CAV1,CD34,CDH5,COL4A3,CX3CR1,S1PR1,EDN1,EMP2,ENG,EPAS1,VEGFD,FLT4,FOLR1,HAS2,HGF,CCN1,MEOX2,NOTCH4,NPR1,ENPP2,PECAM1,PF4,PPARG,PTGS2,PTPRB,SLC1A1,TAL1,TBX5,TCF21,TEK,TGFBR2,TIE1,CLDN5,FZD4,FGF18,APLN,SEMA5A,SLIT2,TBX4,SEMA3E,CALCRL,RAMP2,RAMP3,KLF2,SASH1,RGCC,EGFL7,SOX18,ROBO4,RASIP1,TMEM100,ADAMTS9,RHOJ,HEG1,JCAD,HIF3A,NDNF,MMRN2,ARHGAP24,STARD13,CCBE1,CLEC14A…
1_Member	GO Biological Processes	GO:0001525	angiogenesis	-23.0798	-19.2107	66/611	14,94,240,284,306,358,857,947,1003,1285,1524,1901,1906,2013,2022,2034,2277,2324,3082,3491,4223,4855,4881,5168,5175,5196,5468,5743,5787,6886,6943,7010,7048,7075,7122,8817,8862,9037,9353,9496,9723,10203,10266,10268,10365,23328,28984,51162,54345,54538,54922,55273,56999,57381,57608,64344,79625,79812,83478,90627,147372,161198,168667,406888,406913,641700	AAMP,ACVRL1,ALOX5,ANGPT1,ANXA3,AQP1,CAV1,CD34,CDH5,COL4A3,CX3CR1,S1PR1,EDN1,EMP2,ENG,EPAS1,VEGFD,FLT4,HGF,CCN1,MEOX2,NOTCH4,NPR1,ENPP2,PECAM1,PF4,PPARG,PTGS2,PTPRB,TAL1,TCF21,TEK,TGFBR2,TIE1,CLDN5,FGF18,APLN,SEMA5A,SLIT2,TBX4,SEMA3E,CALCRL,RAMP2,RAMP3,KLF2,SASH1,RGCC,EGFL7,SOX18,ROBO4,RASIP1,TMEM100,ADAMTS9,RHOJ,JCAD,HIF3A,NDNF,MMRN2,ARHGAP24,STARD13,CCBE1,CLEC14A,BMPER,MIRLET7F1,MIR126,ECSCR
1_Member	GO Biological Processes	GO:0001667	ameboidal-type cell migration	-14.7559	-11.2548	47/483	14,94,284,306,1003,1839,1906,1910,2013,2022,2324,2348,3037,4223,5168,5175,5468,5743,5793,7010,7048,7869,8692,8817,9037,9353,9723,9839,23328,23499,28984,54345,56920,56999,57381,57608,79812,84913,90627,91862,114757,147372,152007,161198,168667,406888,406913	AAMP,ACVRL1,ANGPT1,ANXA3,CDH5,HBEGF,EDN1,EDNRB,EMP2,ENG,FLT4,FOLR1,HAS2,MEOX2,ENPP2,PECAM1,PPARG,PTGS2,PTPRG,TEK,TGFBR2,SEMA3B,HYAL2,FGF18,SEMA5A,SLIT2,SEMA3E,ZEB2,SASH1,MACF1,RGCC,SOX18,SEMA3G,ADAMTS9,RHOJ,JCAD,MMRN2,ATOH8,STARD13,MARVELD3,CYGB,CCBE1,GLIPR2,CLEC14A,BMPER,MIRLET7F1,MIR126
1_Member	GO Biological Processes	GO:0010631	epithelial cell migration	-13.6009	-10.1578	39/366	14,94,284,306,1003,1839,1906,2013,2324,3037,4223,5168,5175,5468,5743,5793,7010,7048,8817,9037,9353,9839,23328,23499,28984,54345,56999,57381,57608,79812,84913,90627,91862,147372,152007,161198,168667,406888,406913	AAMP,ACVRL1,ANGPT1,ANXA3,CDH5,HBEGF,EDN1,EMP2,FLT4,HAS2,MEOX2,ENPP2,PECAM1,PPARG,PTGS2,PTPRG,TEK,TGFBR2,FGF18,SEMA5A,SLIT2,ZEB2,SASH1,MACF1,RGCC,SOX18,ADAMTS9,RHOJ,JCAD,MMRN2,ATOH8,STARD13,MARVELD3,CCBE1,GLIPR2,CLEC14A,BMPER,MIRLET7F1,MIR126
1_Member	GO Biological Processes	GO:0090132	epithelium migration	-13.4853	-10.0933	39/369	14,94,284,306,1003,1839,1906,2013,2324,3037,4223,5168,5175,5468,5743,5793,7010,7048,8817,9037,9353,9839,23328,23499,28984,54345,56999,57381,57608,79812,84913,90627,91862,147372,152007,161198,168667,406888,406913	AAMP,ACVRL1,ANGPT1,ANXA3,CDH5,HBEGF,EDN1,EMP2,FLT4,HAS2,MEOX2,ENPP2,PECAM1,PPARG,PTGS2,PTPRG,TEK,TGFBR2,FGF18,SEMA5A,SLIT2,ZEB2,SASH1,MACF1,RGCC,SOX18,ADAMTS9,RHOJ,JCAD,MMRN2,ATOH8,STARD13,MARVELD3,CCBE1,GLIPR2,CLEC14A,BMPER,MIRLET7F1,MIR126
1_Member	GO Biological Processes	GO:0090130	tissue migration	-13.2578	-9.9115	39/375	14,94,284,306,1003,1839,1906,2013,2324,3037,4223,5168,5175,5468,5743,5793,7010,7048,8817,9037,9353,9839,23328,23499,28984,54345,56999,57381,57608,79812,84913,90627,91862,147372,152007,161198,168667,406888,406913	AAMP,ACVRL1,ANGPT1,ANXA3,CDH5,HBEGF,EDN1,EMP2,FLT4,HAS2,MEOX2,ENPP2,PECAM1,PPARG,PTGS2,PTPRG,TEK,TGFBR2,FGF18,SEMA5A,SLIT2,ZEB2,SASH1,MACF1,RGCC,SOX18,ADAMTS9,RHOJ,JCAD,MMRN2,ATOH8,STARD13,MARVELD3,CCBE1,GLIPR2,CLEC14A,BMPER,MIRLET7F1,MIR126
1_Member	GO Biological Processes	GO:0010632	regulation of epithelial cell migration	-12.6175	-9.35044	34/302	14,94,284,306,1839,1906,2013,2324,3037,4223,5168,5468,5743,5793,7010,7048,8817,9037,9353,23328,23499,28984,56999,57381,57608,79812,84913,90627,91862,147372,152007,168667,406888,406913	AAMP,ACVRL1,ANGPT1,ANXA3,HBEGF,EDN1,EMP2,FLT4,HAS2,MEOX2,ENPP2,PPARG,PTGS2,PTPRG,TEK,TGFBR2,FGF18,SEMA5A,SLIT2,SASH1,MACF1,RGCC,ADAMTS9,RHOJ,JCAD,MMRN2,ATOH8,STARD13,MARVELD3,CCBE1,GLIPR2,BMPER,MIRLET7F1,MIR126
1_Member	GO Biological Processes	GO:0045765	regulation of angiogenesis	-12.2233	-8.99101	39/404	94,240,306,358,947,1003,1285,1524,2013,2022,2277,3082,4223,4881,5168,5196,5468,5743,7010,7048,7075,7122,8817,9037,9723,10266,10365,23328,28984,56999,57381,57608,79812,90627,147372,168667,406888,406913,641700	ACVRL1,ALOX5,ANXA3,AQP1,CD34,CDH5,COL4A3,CX3CR1,EMP2,ENG,VEGFD,HGF,MEOX2,NPR1,ENPP2,PF4,PPARG,PTGS2,TEK,TGFBR2,TIE1,CLDN5,FGF18,SEMA5A,SEMA3E,RAMP2,KLF2,SASH1,RGCC,ADAMTS9,RHOJ,JCAD,MMRN2,STARD13,CCBE1,BMPER,MIRLET7F1,MIR126,ECSCR
1_Member	GO Biological Processes	GO:1901342	regulation of vasculature development	-11.5022	-8.33204	40/446	94,240,306,358,947,1003,1285,1524,2013,2022,2277,3082,4223,4881,5168,5196,5468,5743,7010,7048,7075,7122,8817,9037,9723,10266,10365,23328,28984,55273,56999,57381,57608,79812,90627,147372,168667,406888,406913,641700	ACVRL1,ALOX5,ANXA3,AQP1,CD34,CDH5,COL4A3,CX3CR1,EMP2,ENG,VEGFD,HGF,MEOX2,NPR1,ENPP2,PF4,PPARG,PTGS2,TEK,TGFBR2,TIE1,CLDN5,FGF18,SEMA5A,SEMA3E,RAMP2,KLF2,SASH1,RGCC,TMEM100,ADAMTS9,RHOJ,JCAD,MMRN2,STARD13,CCBE1,BMPER,MIRLET7F1,MIR126,ECSCR
1_Member	GO Biological Processes	GO:0040017	positive regulation of locomotion	-11.3304	-8.18827	48/621	14,177,284,306,566,857,858,1003,1524,1839,1901,1906,2277,2324,2358,3037,3082,3383,3491,4739,5168,5175,5420,5743,6403,6693,7010,7048,7869,8817,9037,9353,9723,9732,9806,11170,23328,53905,56920,57091,57381,57608,58191,84913,147372,152007,406888,406913	AAMP,AGER,ANGPT1,ANXA3,AZU1,CAV1,CAV2,CDH5,CX3CR1,HBEGF,S1PR1,EDN1,VEGFD,FLT4,FPR2,HAS2,HGF,ICAM1,CCN1,NEDD9,ENPP2,PECAM1,PODXL,PTGS2,SELP,SPN,TEK,TGFBR2,SEMA3B,FGF18,SEMA5A,SLIT2,SEMA3E,DOCK4,SPOCK2,FAM107A,SASH1,DUOX1,SEMA3G,CASS4,RHOJ,JCAD,CXCL16,ATOH8,CCBE1,GLIPR2,MIRLET7F1,MIR126
1_Member	GO Biological Processes	GO:0051272	positive regulation of cellular component movement	-10.4931	-7.48652	46/611	14,177,284,306,857,1003,1524,1839,1901,1906,2277,2324,2358,3037,3082,3383,3491,4739,5168,5175,5420,5743,6403,6693,7010,7048,7869,8817,9037,9638,9723,9732,9806,11170,23328,53905,56920,57091,57381,57608,58191,84913,147372,152007,406888,406913	AAMP,AGER,ANGPT1,ANXA3,CAV1,CDH5,CX3CR1,HBEGF,S1PR1,EDN1,VEGFD,FLT4,FPR2,HAS2,HGF,ICAM1,CCN1,NEDD9,ENPP2,PECAM1,PODXL,PTGS2,SELP,SPN,TEK,TGFBR2,SEMA3B,FGF18,SEMA5A,FEZ1,SEMA3E,DOCK4,SPOCK2,FAM107A,SASH1,DUOX1,SEMA3G,CASS4,RHOJ,JCAD,CXCL16,ATOH8,CCBE1,GLIPR2,MIRLET7F1,MIR126
1_Member	GO Biological Processes	GO:0002040	sprouting angiogenesis	-10.475	-7.48652	25/199	94,240,284,2022,2277,2324,4223,5743,7010,8817,9037,9353,9723,10266,10365,56999,57381,57608,79812,90627,147372,161198,168667,406888,406913	ACVRL1,ALOX5,ANGPT1,ENG,VEGFD,FLT4,MEOX2,PTGS2,TEK,FGF18,SEMA5A,SLIT2,SEMA3E,RAMP2,KLF2,ADAMTS9,RHOJ,JCAD,MMRN2,STARD13,CCBE1,CLEC14A,BMPER,MIRLET7F1,MIR126
1_Member	GO Biological Processes	GO:0043542	endothelial cell migration	-10.3915	-7.44124	30/287	14,94,284,306,1003,1906,2013,2324,4223,5175,5468,5743,7010,8817,9037,9353,23328,28984,54345,56999,57381,57608,79812,84913,90627,147372,161198,168667,406888,406913	AAMP,ACVRL1,ANGPT1,ANXA3,CDH5,EDN1,EMP2,FLT4,MEOX2,PECAM1,PPARG,PTGS2,TEK,FGF18,SEMA5A,SLIT2,SASH1,RGCC,SOX18,ADAMTS9,RHOJ,JCAD,MMRN2,ATOH8,STARD13,CCBE1,CLEC14A,BMPER,MIRLET7F1,MIR126
1_Member	GO Biological Processes	GO:2000147	positive regulation of cell motility	-10.3896	-7.44124	45/593	14,177,284,306,857,1003,1524,1839,1901,1906,2277,2324,2358,3037,3082,3383,3491,4739,5168,5175,5420,5743,6403,6693,7010,7048,7869,8817,9037,9723,9732,9806,11170,23328,53905,56920,57091,57381,57608,58191,84913,147372,152007,406888,406913	AAMP,AGER,ANGPT1,ANXA3,CAV1,CDH5,CX3CR1,HBEGF,S1PR1,EDN1,VEGFD,FLT4,FPR2,HAS2,HGF,ICAM1,CCN1,NEDD9,ENPP2,PECAM1,PODXL,PTGS2,SELP,SPN,TEK,TGFBR2,SEMA3B,FGF18,SEMA5A,SEMA3E,DOCK4,SPOCK2,FAM107A,SASH1,DUOX1,SEMA3G,CASS4,RHOJ,JCAD,CXCL16,ATOH8,CCBE1,GLIPR2,MIRLET7F1,MIR126
1_Member	GO Biological Processes	GO:0030335	positive regulation of cell migration	-9.94312	-7.07398	43/567	14,177,284,306,857,1003,1524,1839,1901,1906,2277,2324,2358,3037,3082,3383,3491,4739,5168,5175,5420,5743,6403,6693,7010,7048,7869,8817,9037,9723,9732,11170,23328,56920,57091,57381,57608,58191,84913,147372,152007,406888,406913	AAMP,AGER,ANGPT1,ANXA3,CAV1,CDH5,CX3CR1,HBEGF,S1PR1,EDN1,VEGFD,FLT4,FPR2,HAS2,HGF,ICAM1,CCN1,NEDD9,ENPP2,PECAM1,PODXL,PTGS2,SELP,SPN,TEK,TGFBR2,SEMA3B,FGF18,SEMA5A,SEMA3E,DOCK4,FAM107A,SASH1,SEMA3G,CASS4,RHOJ,JCAD,CXCL16,ATOH8,CCBE1,GLIPR2,MIRLET7F1,MIR126
1_Member	GO Biological Processes	GO:0010594	regulation of endothelial cell migration	-9.46786	-6.64012	26/239	14,94,284,306,1906,2013,2324,4223,5468,5743,7010,8817,9037,9353,23328,28984,56999,57381,57608,79812,84913,90627,147372,168667,406888,406913	AAMP,ACVRL1,ANGPT1,ANXA3,EDN1,EMP2,FLT4,MEOX2,PPARG,PTGS2,TEK,FGF18,SEMA5A,SLIT2,SASH1,RGCC,ADAMTS9,RHOJ,JCAD,MMRN2,ATOH8,STARD13,CCBE1,BMPER,MIRLET7F1,MIR126
1_Member	GO Biological Processes	GO:0045766	positive regulation of angiogenesis	-8.58756	-5.85409	23/208	94,306,358,947,1003,1524,2022,2277,3082,5743,7010,7048,7075,8817,9037,10266,23328,57381,57608,147372,168667,406888,406913	ACVRL1,ANXA3,AQP1,CD34,CDH5,CX3CR1,ENG,VEGFD,HGF,PTGS2,TEK,TGFBR2,TIE1,FGF18,SEMA5A,RAMP2,SASH1,RHOJ,JCAD,CCBE1,BMPER,MIRLET7F1,MIR126
1_Member	GO Biological Processes	GO:0010634	positive regulation of epithelial cell migration	-8.44717	-5.73439	21/177	14,284,306,1839,1906,2324,3037,5168,5743,7010,7048,8817,9037,23328,57381,57608,84913,147372,152007,406888,406913	AAMP,ANGPT1,ANXA3,HBEGF,EDN1,FLT4,HAS2,ENPP2,PTGS2,TEK,TGFBR2,FGF18,SEMA5A,SASH1,RHOJ,JCAD,ATOH8,CCBE1,GLIPR2,MIRLET7F1,MIR126
1_Member	GO Biological Processes	GO:1904018	positive regulation of vasculature development	-8.24021	-5.5752	24/235	94,306,358,947,1003,1524,2022,2277,3082,5743,7010,7048,7075,8817,9037,10266,23328,55273,57381,57608,147372,168667,406888,406913	ACVRL1,ANXA3,AQP1,CD34,CDH5,CX3CR1,ENG,VEGFD,HGF,PTGS2,TEK,TGFBR2,TIE1,FGF18,SEMA5A,RAMP2,SASH1,TMEM100,RHOJ,JCAD,CCBE1,BMPER,MIRLET7F1,MIR126
1_Member	GO Biological Processes	GO:0010595	positive regulation of endothelial cell migration	-6.67223	-4.18088	16/133	14,284,306,1906,2324,5743,7010,8817,9037,23328,57381,57608,84913,147372,406888,406913	AAMP,ANGPT1,ANXA3,EDN1,FLT4,PTGS2,TEK,FGF18,SEMA5A,SASH1,RHOJ,JCAD,ATOH8,CCBE1,MIRLET7F1,MIR126
1_Member	GO Biological Processes	GO:0043534	blood vessel endothelial cell migration	-5.86158	-3.58721	18/190	94,284,1003,2013,4223,5468,5743,8817,9353,28984,54345,57381,57608,79812,90627,161198,406888,406913	ACVRL1,ANGPT1,CDH5,EMP2,MEOX2,PPARG,PTGS2,FGF18,SLIT2,RGCC,SOX18,RHOJ,JCAD,MMRN2,STARD13,CLEC14A,MIRLET7F1,MIR126
1_Member	GO Biological Processes	GO:1903670	regulation of sprouting angiogenesis	-4.00381	-2.17077	13/150	240,4223,5743,8817,10365,56999,57381,57608,79812,90627,168667,406888,406913	ALOX5,MEOX2,PTGS2,FGF18,KLF2,ADAMTS9,RHOJ,JCAD,MMRN2,STARD13,BMPER,MIRLET7F1,MIR126
1_Member	GO Biological Processes	GO:0002042	cell migration involved in sprouting angiogenesis	-3.60702	-1.85955	10/103	4223,5743,9353,57381,57608,79812,90627,161198,406888,406913	MEOX2,PTGS2,SLIT2,RHOJ,JCAD,MMRN2,STARD13,CLEC14A,MIRLET7F1,MIR126
1_Member	GO Biological Processes	GO:0043535	regulation of blood vessel endothelial cell migration	-3.59067	-1.84539	13/165	94,284,4223,5468,5743,8817,28984,57381,57608,79812,90627,406888,406913	ACVRL1,ANGPT1,MEOX2,PPARG,PTGS2,FGF18,RGCC,RHOJ,JCAD,MMRN2,STARD13,MIRLET7F1,MIR126
1_Member	GO Biological Processes	GO:0090049	regulation of cell migration involved in sprouting angiogenesis	-2.83982	-1.27026	8/87	4223,5743,57381,57608,79812,90627,406888,406913	MEOX2,PTGS2,RHOJ,JCAD,MMRN2,STARD13,MIRLET7F1,MIR126
1_Member	GO Biological Processes	GO:0090050	positive regulation of cell migration involved in sprouting angiogenesis	-2.67791	-1.14189	5/37	5743,57381,57608,406888,406913	PTGS2,RHOJ,JCAD,MIRLET7F1,MIR126
1_Member	GO Biological Processes	GO:0043536	positive regulation of blood vessel endothelial cell migration	-2.42697	-0.955778	7/80	284,5743,8817,57381,57608,406888,406913	ANGPT1,PTGS2,FGF18,RHOJ,JCAD,MIRLET7F1,MIR126
1_Member	GO Biological Processes	GO:1903672	positive regulation of sprouting angiogenesis	-2.1977	-0.785276	6/67	5743,57381,57608,168667,406888,406913	PTGS2,RHOJ,JCAD,BMPER,MIRLET7F1,MIR126
2_Summary	GO Biological Processes	GO:0003013	circulatory system process	-16.7526	-13.0084	54/559	94,153,154,177,284,554,566,654,778,785,857,947,1003,1193,1285,1359,1636,1839,1906,1910,2013,2034,2865,3383,3777,4223,4881,4883,4973,5144,5468,5743,6323,6327,6330,6445,6505,6532,7010,7122,7134,7136,7273,8557,8862,9254,9353,9732,10266,10268,10659,57493,83988,342527,358,3082,6588,7222,10203,10497,11076,11343,51196,51762,55273,56729,80223,84676,85358,120892	ACVRL1,ADRB1,ADRB2,AGER,ANGPT1,AVPR2,AZU1,BMP6,CACNA1F,CACNB4,CAV1,CD34,CDH5,CLIC2,COL4A3,CPA3,ACE,HBEGF,EDN1,EDNRB,EMP2,EPAS1,FFAR3,ICAM1,KCNK3,MEOX2,NPR1,NPR3,OLR1,PDE4D,PPARG,PTGS2,SCN1A,SCN2B,SCN4B,SGCG,SLC1A1,SLC6A4,TEK,CLDN5,TNNC1,TNNI2,TTN,TCAP,APLN,CACNA2D2,SLIT2,DOCK4,RAMP2,RAMP3,CELF2,HEG1,NCALD,SMTNL2,AQP1,HGF,SLN,TRPC3,CALCRL,UNC13B,TPPP,MGLL,PLCE1,RAB8B,TMEM100,RETN,RAB11FIP1,TRIM63,…
2_Member	GO Biological Processes	GO:0003013	circulatory system process	-16.7526	-13.0084	54/559	94,153,154,177,284,554,566,654,778,785,857,947,1003,1193,1285,1359,1636,1839,1906,1910,2013,2034,2865,3383,3777,4223,4881,4883,4973,5144,5468,5743,6323,6327,6330,6445,6505,6532,7010,7122,7134,7136,7273,8557,8862,9254,9353,9732,10266,10268,10659,57493,83988,342527	ACVRL1,ADRB1,ADRB2,AGER,ANGPT1,AVPR2,AZU1,BMP6,CACNA1F,CACNB4,CAV1,CD34,CDH5,CLIC2,COL4A3,CPA3,ACE,HBEGF,EDN1,EDNRB,EMP2,EPAS1,FFAR3,ICAM1,KCNK3,MEOX2,NPR1,NPR3,OLR1,PDE4D,PPARG,PTGS2,SCN1A,SCN2B,SCN4B,SGCG,SLC1A1,SLC6A4,TEK,CLDN5,TNNC1,TNNI2,TTN,TCAP,APLN,CACNA2D2,SLIT2,DOCK4,RAMP2,RAMP3,CELF2,HEG1,NCALD,SMTNL2
2_Member	GO Biological Processes	GO:0008015	blood circulation	-15.8197	-12.2516	52/548	94,153,154,177,284,554,566,654,778,785,857,947,1003,1193,1285,1359,1636,1839,1906,1910,2013,2034,2865,3383,3777,4223,4881,4883,4973,5144,5468,5743,6323,6327,6330,6445,6505,6532,7010,7122,7134,7136,7273,8557,8862,9254,9353,9732,10266,10659,83988,342527	ACVRL1,ADRB1,ADRB2,AGER,ANGPT1,AVPR2,AZU1,BMP6,CACNA1F,CACNB4,CAV1,CD34,CDH5,CLIC2,COL4A3,CPA3,ACE,HBEGF,EDN1,EDNRB,EMP2,EPAS1,FFAR3,ICAM1,KCNK3,MEOX2,NPR1,NPR3,OLR1,PDE4D,PPARG,PTGS2,SCN1A,SCN2B,SCN4B,SGCG,SLC1A1,SLC6A4,TEK,CLDN5,TNNC1,TNNI2,TTN,TCAP,APLN,CACNA2D2,SLIT2,DOCK4,RAMP2,CELF2,NCALD,SMTNL2
2_Member	GO Biological Processes	GO:0044057	regulation of system process	-10.1415	-7.22665	46/626	153,154,177,358,554,654,778,785,857,1193,1636,1839,1906,1910,2013,2034,3082,3383,3777,4881,5144,5743,6327,6330,6505,6588,7134,7136,7222,8862,9254,9732,10203,10497,10659,11076,11343,51196,51762,55273,56729,80223,84676,85358,120892,342527	ADRB1,ADRB2,AGER,AQP1,AVPR2,BMP6,CACNA1F,CACNB4,CAV1,CLIC2,ACE,HBEGF,EDN1,EDNRB,EMP2,EPAS1,HGF,ICAM1,KCNK3,NPR1,PDE4D,PTGS2,SCN2B,SCN4B,SLC1A1,SLN,TNNC1,TNNI2,TRPC3,APLN,CACNA2D2,DOCK4,CALCRL,UNC13B,CELF2,TPPP,MGLL,PLCE1,RAB8B,TMEM100,RETN,RAB11FIP1,TRIM63,SHANK3,LRRK2,SMTNL2
2_Member	GO Biological Processes	GO:0003015	heart process	-6.94147	-4.39455	25/295	153,778,785,857,1193,1636,1839,1906,2034,3777,4881,5144,6323,6327,6330,6445,6505,7134,7136,7273,8557,8862,9254,10268,10659	ADRB1,CACNA1F,CACNB4,CAV1,CLIC2,ACE,HBEGF,EDN1,EPAS1,KCNK3,NPR1,PDE4D,SCN1A,SCN2B,SCN4B,SGCG,SLC1A1,TNNC1,TNNI2,TTN,TCAP,APLN,CACNA2D2,RAMP3,CELF2
2_Member	GO Biological Processes	GO:0060047	heart contraction	-6.63857	-4.17313	24/285	153,778,785,857,1193,1636,1839,1906,2034,3777,4881,5144,6323,6327,6330,6445,6505,7134,7136,7273,8557,8862,9254,10659	ADRB1,CACNA1F,CACNB4,CAV1,CLIC2,ACE,HBEGF,EDN1,EPAS1,KCNK3,NPR1,PDE4D,SCN1A,SCN2B,SCN4B,SGCG,SLC1A1,TNNC1,TNNI2,TTN,TCAP,APLN,CACNA2D2,CELF2
2_Member	GO Biological Processes	GO:1903522	regulation of blood circulation	-6.12957	-3.78331	24/304	153,177,554,778,785,857,1193,1636,1839,1906,2034,3383,3777,4881,5144,5743,6327,6330,6505,8862,9254,9732,10659,342527	ADRB1,AGER,AVPR2,CACNA1F,CACNB4,CAV1,CLIC2,ACE,HBEGF,EDN1,EPAS1,ICAM1,KCNK3,NPR1,PDE4D,PTGS2,SCN2B,SCN4B,SLC1A1,APLN,CACNA2D2,DOCK4,CELF2,SMTNL2
2_Member	GO Biological Processes	GO:0008016	regulation of heart contraction	-3.58424	-1.84068	17/257	153,778,785,857,1193,1839,1906,2034,3777,4881,5144,6327,6330,6505,8862,9254,10659	ADRB1,CACNA1F,CACNB4,CAV1,CLIC2,HBEGF,EDN1,EPAS1,KCNK3,NPR1,PDE4D,SCN2B,SCN4B,SLC1A1,APLN,CACNA2D2,CELF2
2_Member	GO Biological Processes	GO:0045823	positive regulation of heart contraction	-2.38678	-0.923623	5/43	153,1906,5144,6505,8862	ADRB1,EDN1,PDE4D,SLC1A1,APLN
2_Member	GO Biological Processes	GO:0002027	regulation of heart rate	-2.3542	-0.897251	8/104	153,857,1906,2034,5144,6327,6330,6505	ADRB1,CAV1,EDN1,EPAS1,PDE4D,SCN2B,SCN4B,SLC1A1
2_Member	GO Biological Processes	GO:0010460	positive regulation of heart rate	-2.31865	-0.876029	4/28	153,1906,5144,6505	ADRB1,EDN1,PDE4D,SLC1A1
3_Summary	Canonical Pathways	M5885	NABA MATRISOME ASSOCIATED	-16.4404	-12.7931	63/751	2,12,284,306,651,653,654,1440,1473,1839,1953,2262,2277,2662,2920,2921,3082,5196,6274,6275,6358,6361,6368,6439,6440,6441,7052,7078,7123,7472,7869,8547,8692,8817,9037,9723,10272,11095,11197,25975,51162,51267,51705,54507,56920,56999,57188,64399,79148,81035,89780,114898,140689,142683,147372,161198,170689,253935,253970,339479,389376,653509,729238	A2M,SERPINA3,ANGPT1,ANXA3,BMP3,BMP5,BMP6,CSF3,CST5,HBEGF,MEGF6,GPC5,VEGFD,GDF10,CXCL2,CXCL3,HGF,PF4,S100A3,S100A4,CCL14,CCL17,CCL23,SFTPB,SFTPC,SFTPD,TGM2,TIMP3,CLEC3B,WNT2,SEMA3B,FCN3,HYAL2,FGF18,SEMA5A,SEMA3E,FSTL3,ADAMTS8,WIF1,EGFL6,EGFL7,CLEC1A,EMCN,ADAMTSL4,SEMA3G,ADAMTS9,ADAMTSL3,HHIP,MMP28,COLEC12,WNT3A,C1QTNF2,CBLN4,ITLN2,CCBE1,CLEC14A,ADAMTS15,ANGPTL5,SFTA3,BRINP3,SFTA2,SFTPA1,SFTPA2
3_Member	Canonical Pathways	M5885	NABA MATRISOME ASSOCIATED	-16.4404	-12.7931	63/751	2,12,284,306,651,653,654,1440,1473,1839,1953,2262,2277,2662,2920,2921,3082,5196,6274,6275,6358,6361,6368,6439,6440,6441,7052,7078,7123,7472,7869,8547,8692,8817,9037,9723,10272,11095,11197,25975,51162,51267,51705,54507,56920,56999,57188,64399,79148,81035,89780,114898,140689,142683,147372,161198,170689,253935,253970,339479,389376,653509,729238	A2M,SERPINA3,ANGPT1,ANXA3,BMP3,BMP5,BMP6,CSF3,CST5,HBEGF,MEGF6,GPC5,VEGFD,GDF10,CXCL2,CXCL3,HGF,PF4,S100A3,S100A4,CCL14,CCL17,CCL23,SFTPB,SFTPC,SFTPD,TGM2,TIMP3,CLEC3B,WNT2,SEMA3B,FCN3,HYAL2,FGF18,SEMA5A,SEMA3E,FSTL3,ADAMTS8,WIF1,EGFL6,EGFL7,CLEC1A,EMCN,ADAMTSL4,SEMA3G,ADAMTS9,ADAMTSL3,HHIP,MMP28,COLEC12,WNT3A,C1QTNF2,CBLN4,ITLN2,CCBE1,CLEC14A,ADAMTS15,ANGPTL5,SFTA3,BRINP3,SFTA2,SFTPA1,SFTPA2
3_Member	Canonical Pathways	M5883	NABA SECRETED FACTORS	-8.52118	-5.79817	30/343	284,651,653,654,1440,1839,1953,2277,2662,2920,2921,3082,5196,6274,6275,6358,6361,6368,7472,8817,10272,11197,25975,51162,64399,89780,140689,147372,253935,339479	ANGPT1,BMP3,BMP5,BMP6,CSF3,HBEGF,MEGF6,VEGFD,GDF10,CXCL2,CXCL3,HGF,PF4,S100A3,S100A4,CCL14,CCL17,CCL23,WNT2,FGF18,FSTL3,WIF1,EGFL6,EGFL7,HHIP,WNT3A,CBLN4,CCBE1,ANGPTL5,BRINP3
4_Summary	GO Biological Processes	GO:0043062	extracellular structure organization	-13.0029	-9.69806	43/458	2,857,858,947,948,1285,1286,1305,2022,2295,3037,3383,3384,3386,3491,4023,4148,4239,5175,5322,5806,7087,7177,7450,8515,9806,10266,10319,11095,22854,25975,28984,54507,56155,56999,57188,59277,64116,79148,79625,89780,170689,338328,825,1088,2202,4053,4593,131873,256076	A2M,CAV1,CAV2,CD34,CD36,COL4A3,COL4A4,COL13A1,ENG,FOXF2,HAS2,ICAM1,ICAM2,ICAM4,CCN1,LPL,MATN3,MFAP4,PECAM1,PLA2G5,PTX3,ICAM5,TPSAB1,VWF,ITGA10,SPOCK2,RAMP2,LAMC3,ADAMTS8,NTNG1,EGFL6,RGCC,ADAMTSL4,TEX14,ADAMTS9,ADAMTSL3,NTN4,SLC39A8,MMP28,NDNF,WNT3A,ADAMTS15,GPIHBP1,CAPN3,CEACAM8,EFEMP1,LTBP2,MUSK,COL6A6,COL6A5
4_Member	GO Biological Processes	GO:0043062	extracellular structure organization	-13.0029	-9.69806	43/458	2,857,858,947,948,1285,1286,1305,2022,2295,3037,3383,3384,3386,3491,4023,4148,4239,5175,5322,5806,7087,7177,7450,8515,9806,10266,10319,11095,22854,25975,28984,54507,56155,56999,57188,59277,64116,79148,79625,89780,170689,338328	A2M,CAV1,CAV2,CD34,CD36,COL4A3,COL4A4,COL13A1,ENG,FOXF2,HAS2,ICAM1,ICAM2,ICAM4,CCN1,LPL,MATN3,MFAP4,PECAM1,PLA2G5,PTX3,ICAM5,TPSAB1,VWF,ITGA10,SPOCK2,RAMP2,LAMC3,ADAMTS8,NTNG1,EGFL6,RGCC,ADAMTSL4,TEX14,ADAMTS9,ADAMTSL3,NTN4,SLC39A8,MMP28,NDNF,WNT3A,ADAMTS15,GPIHBP1
4_Member	GO Biological Processes	GO:0030198	extracellular matrix organization	-11.1718	-8.05597	37/397	2,857,858,1285,1286,1305,2022,2295,3037,3383,3384,3386,3491,4148,4239,5175,5806,7087,7177,7450,8515,9806,10266,10319,11095,22854,25975,28984,54507,56999,57188,59277,64116,79148,79625,89780,170689	A2M,CAV1,CAV2,COL4A3,COL4A4,COL13A1,ENG,FOXF2,HAS2,ICAM1,ICAM2,ICAM4,CCN1,MATN3,MFAP4,PECAM1,PTX3,ICAM5,TPSAB1,VWF,ITGA10,SPOCK2,RAMP2,LAMC3,ADAMTS8,NTNG1,EGFL6,RGCC,ADAMTSL4,ADAMTS9,ADAMTSL3,NTN4,SLC39A8,MMP28,NDNF,WNT3A,ADAMTS15
4_Member	Reactome Gene Sets	R-HSA-1474244	Extracellular matrix organization	-6.77408	-4.24737	25/301	2,825,1088,1285,1286,1305,2202,3383,3384,3386,4053,4148,4239,4593,5175,7087,7177,7450,8515,10319,11095,56999,59277,131873,256076	A2M,CAPN3,CEACAM8,COL4A3,COL4A4,COL13A1,EFEMP1,ICAM1,ICAM2,ICAM4,LTBP2,MATN3,MFAP4,MUSK,PECAM1,ICAM5,TPSAB1,VWF,ITGA10,LAMC3,ADAMTS8,ADAMTS9,NTN4,COL6A6,COL6A5
4_Member	Reactome Gene Sets	R-HSA-216083	Integrin cell surface interactions	-5.90173	-3.61618	12/85	1285,1286,1305,3383,3384,3386,5175,7087,7450,8515,131873,256076	COL4A3,COL4A4,COL13A1,ICAM1,ICAM2,ICAM4,PECAM1,ICAM5,VWF,ITGA10,COL6A6,COL6A5
5_Summary	GO Biological Processes	GO:0003007	heart morphogenesis	-11.5222	-8.33204	30/259	94,653,1901,2022,2348,3037,3491,4091,5914,6092,6586,6910,7010,7048,7122,7134,7273,7472,8313,8557,9353,10395,26508,27063,54345,55273,57493,79633,89780,140706,1396,1906,4628,5468,6445,8862,10203,10266,23767,51196,56999,104,825,857,858,1839,2115,4223,6943,9172,58529,146862,1910,2034,6361,9254,79652,405754,4792,358,654,5743,6323,54532,56729,85358,408,22899,22998,28984,221692,11076	ACVRL1,BMP5,S1PR1,ENG,FOLR1,HAS2,CCN1,SMAD6,RARA,ROBO2,SLIT3,TBX5,TEK,TGFBR2,CLDN5,TNNC1,TTN,WNT2,AXIN2,TCAP,SLIT2,DLC1,HEYL,ANKRD1,SOX18,TMEM100,HEG1,FAT4,WNT3A,CCM2L,CRIP1,EDN1,MYH10,PPARG,SGCG,APLN,CALCRL,RAMP2,FLRT3,PLCE1,ADAMTS9,ADARB1,CAPN3,CAV1,CAV2,HBEGF,ETV1,MEOX2,TCF21,MYOM2,MYOZ1,UNC45B,EDNRB,EPAS1,CCL17,CACNA2D2,TMEM204,ERVFRD-1,NFKBIA,AQP1,BMP6,PTGS2,SCN1A,USP53,RETN,SHANK3,ARRB1,ARH…
5_Member	GO Biological Processes	GO:0003007	heart morphogenesis	-11.5222	-8.33204	30/259	94,653,1901,2022,2348,3037,3491,4091,5914,6092,6586,6910,7010,7048,7122,7134,7273,7472,8313,8557,9353,10395,26508,27063,54345,55273,57493,79633,89780,140706	ACVRL1,BMP5,S1PR1,ENG,FOLR1,HAS2,CCN1,SMAD6,RARA,ROBO2,SLIT3,TBX5,TEK,TGFBR2,CLDN5,TNNC1,TTN,WNT2,AXIN2,TCAP,SLIT2,DLC1,HEYL,ANKRD1,SOX18,TMEM100,HEG1,FAT4,WNT3A,CCM2L
5_Member	GO Biological Processes	GO:0007507	heart development	-8.39219	-5.68939	41/590	94,653,1396,1901,1906,2022,2348,3037,3491,4091,4628,5468,5914,6092,6445,6586,6910,7010,7048,7122,7134,7273,7472,8313,8557,8862,9353,10203,10266,10395,23767,26508,27063,51196,54345,55273,56999,57493,79633,89780,140706	ACVRL1,BMP5,CRIP1,S1PR1,EDN1,ENG,FOLR1,HAS2,CCN1,SMAD6,MYH10,PPARG,RARA,ROBO2,SGCG,SLIT3,TBX5,TEK,TGFBR2,CLDN5,TNNC1,TTN,WNT2,AXIN2,TCAP,APLN,SLIT2,CALCRL,RAMP2,DLC1,FLRT3,HEYL,ANKRD1,PLCE1,SOX18,TMEM100,ADAMTS9,HEG1,FAT4,WNT3A,CCM2L
5_Member	GO Biological Processes	GO:0007517	muscle organ development	-4.89401	-2.82422	26/407	104,825,857,858,1839,1901,1906,2022,2115,4223,6445,6910,6943,7048,7134,7273,7472,8557,9172,26508,27063,57493,58529,89780,140706,146862	ADARB1,CAPN3,CAV1,CAV2,HBEGF,S1PR1,EDN1,ENG,ETV1,MEOX2,SGCG,TBX5,TCF21,TGFBR2,TNNC1,TTN,WNT2,TCAP,MYOM2,HEYL,ANKRD1,HEG1,MYOZ1,WNT3A,CCM2L,UNC45B
5_Member	GO Biological Processes	GO:0014706	striated muscle tissue development	-4.75456	-2.72006	25/390	653,857,858,1901,1906,2022,4223,4628,5914,6445,6910,6943,7048,7134,7273,7472,8557,9172,26508,27063,56999,57493,58529,89780,140706	BMP5,CAV1,CAV2,S1PR1,EDN1,ENG,MEOX2,MYH10,RARA,SGCG,TBX5,TCF21,TGFBR2,TNNC1,TTN,WNT2,TCAP,MYOM2,HEYL,ANKRD1,ADAMTS9,HEG1,MYOZ1,WNT3A,CCM2L
5_Member	GO Biological Processes	GO:0060415	muscle tissue morphogenesis	-4.68922	-2.67742	10/77	104,1901,2022,7134,7273,7472,8557,27063,57493,140706	ADARB1,S1PR1,ENG,TNNC1,TTN,WNT2,TCAP,ANKRD1,HEG1,CCM2L
5_Member	GO Biological Processes	GO:0048738	cardiac muscle tissue development	-4.6523	-2.6524	18/232	653,1901,1906,2022,4628,5914,6445,6910,7048,7134,7273,7472,8557,27063,56999,57493,89780,140706	BMP5,S1PR1,EDN1,ENG,MYH10,RARA,SGCG,TBX5,TGFBR2,TNNC1,TTN,WNT2,TCAP,ANKRD1,ADAMTS9,HEG1,WNT3A,CCM2L
5_Member	GO Biological Processes	GO:0055008	cardiac muscle tissue morphogenesis	-4.61383	-2.61942	9/63	1901,2022,7134,7273,7472,8557,27063,57493,140706	S1PR1,ENG,TNNC1,TTN,WNT2,TCAP,ANKRD1,HEG1,CCM2L
5_Member	GO Biological Processes	GO:0060537	muscle tissue development	-4.39572	-2.47598	25/410	653,857,858,1901,1906,2022,4223,4628,5914,6445,6910,6943,7048,7134,7273,7472,8557,9172,26508,27063,56999,57493,58529,89780,140706	BMP5,CAV1,CAV2,S1PR1,EDN1,ENG,MEOX2,MYH10,RARA,SGCG,TBX5,TCF21,TGFBR2,TNNC1,TTN,WNT2,TCAP,MYOM2,HEYL,ANKRD1,ADAMTS9,HEG1,MYOZ1,WNT3A,CCM2L
5_Member	GO Biological Processes	GO:0048644	muscle organ morphogenesis	-4.3559	-2.45369	10/84	104,1901,2022,7134,7273,7472,8557,27063,57493,140706	ADARB1,S1PR1,ENG,TNNC1,TTN,WNT2,TCAP,ANKRD1,HEG1,CCM2L
5_Member	GO Biological Processes	GO:0061061	muscle structure development	-4.29518	-2.40982	35/683	104,825,857,858,1839,1901,1906,1910,2022,2034,2115,4223,4628,5914,6361,6445,6910,6943,7048,7134,7273,7472,8557,9172,9254,10266,26508,27063,57493,58529,79652,89780,140706,146862,405754	ADARB1,CAPN3,CAV1,CAV2,HBEGF,S1PR1,EDN1,EDNRB,ENG,EPAS1,ETV1,MEOX2,MYH10,RARA,CCL17,SGCG,TBX5,TCF21,TGFBR2,TNNC1,TTN,WNT2,TCAP,MYOM2,CACNA2D2,RAMP2,HEYL,ANKRD1,HEG1,MYOZ1,TMEM204,WNT3A,CCM2L,UNC45B,ERVFRD-1
5_Member	GO Biological Processes	GO:0035994	response to muscle stretch	-4.21541	-2.34628	5/18	1906,4792,7273,8557,27063	EDN1,NFKBIA,TTN,TCAP,ANKRD1
5_Member	GO Biological Processes	GO:0009612	response to mechanical stimulus	-4.13402	-2.27781	16/209	358,654,1906,2022,2115,4792,5468,5743,6323,7048,7273,8557,27063,54532,56729,85358	AQP1,BMP6,EDN1,ENG,ETV1,NFKBIA,PPARG,PTGS2,SCN1A,TGFBR2,TTN,TCAP,ANKRD1,USP53,RETN,SHANK3
5_Member	GO Biological Processes	GO:0031032	actomyosin structure organization	-3.27399	-1.59331	14/201	408,825,1901,1906,4628,7273,8557,10395,22899,22998,27063,28984,58529,221692	ARRB1,CAPN3,S1PR1,EDN1,MYH10,TTN,TCAP,DLC1,ARHGEF15,LIMCH1,ANKRD1,RGCC,MYOZ1,PHACTR1
5_Member	GO Biological Processes	GO:0045214	sarcomere organization	-3.08691	-1.44907	6/45	825,1906,7273,8557,27063,58529	CAPN3,EDN1,TTN,TCAP,ANKRD1,MYOZ1
5_Member	GO Biological Processes	GO:0030239	myofibril assembly	-2.86984	-1.29222	7/67	825,1906,4628,7273,8557,27063,58529	CAPN3,EDN1,MYH10,TTN,TCAP,ANKRD1,MYOZ1
5_Member	GO Biological Processes	GO:0055001	muscle cell development	-2.20606	-0.791258	11/183	825,858,1906,2022,4628,7273,8557,9254,10266,27063,58529	CAPN3,CAV2,EDN1,ENG,MYH10,TTN,TCAP,CACNA2D2,RAMP2,ANKRD1,MYOZ1
5_Member	GO Biological Processes	GO:0010927	cellular component assembly involved in morphogenesis	-2.16227	-0.760988	8/112	825,1906,4628,7273,8557,11076,27063,58529	CAPN3,EDN1,MYH10,TTN,TCAP,TPPP,ANKRD1,MYOZ1
6_Summary	GO Biological Processes	GO:0006935	chemotaxis	-11.0223	-7.93131	49/656	177,240,284,566,1441,1524,1808,1839,1901,1906,1910,2115,2277,2358,2920,2921,3082,3491,3730,4628,5144,5168,5196,5319,6092,6358,6361,6368,6441,6586,6693,7869,8817,9037,9353,9638,9723,9732,23767,27202,53358,54538,56920,58191,59277,79148,85358,89780,641700,653,857,947,1088,2995,3383,4973,5175,6403,6566,7010,7056,54210,90865,90952,91662,153,154,554,976,1604,2015,2791,2865,5739,7433,7472,8322,8862,9002…	AGER,ALOX5,ANGPT1,AZU1,CSF3R,CX3CR1,DPYSL2,HBEGF,S1PR1,EDN1,EDNRB,ETV1,VEGFD,FPR2,CXCL2,CXCL3,HGF,CCN1,ANOS1,MYH10,PDE4D,ENPP2,PF4,PLA2G1B,ROBO2,CCL14,CCL17,CCL23,SFTPD,SLIT3,SPN,SEMA3B,FGF18,SEMA5A,SLIT2,FEZ1,SEMA3E,DOCK4,FLRT3,C5AR2,SHC3,ROBO4,SEMA3G,CXCL16,NTN4,MMP28,SHANK3,WNT3A,ECSCR,BMP5,CAV1,CD34,CEACAM8,GYPC,ICAM1,OLR1,PECAM1,SELP,SLC16A1,TEK,THBD,TREM1,IL33,ESAM,NLRP12,ADRB1,ADRB2,AVPR2,…
6_Member	GO Biological Processes	GO:0006935	chemotaxis	-11.0223	-7.93131	49/656	177,240,284,566,1441,1524,1808,1839,1901,1906,1910,2115,2277,2358,2920,2921,3082,3491,3730,4628,5144,5168,5196,5319,6092,6358,6361,6368,6441,6586,6693,7869,8817,9037,9353,9638,9723,9732,23767,27202,53358,54538,56920,58191,59277,79148,85358,89780,641700	AGER,ALOX5,ANGPT1,AZU1,CSF3R,CX3CR1,DPYSL2,HBEGF,S1PR1,EDN1,EDNRB,ETV1,VEGFD,FPR2,CXCL2,CXCL3,HGF,CCN1,ANOS1,MYH10,PDE4D,ENPP2,PF4,PLA2G1B,ROBO2,CCL14,CCL17,CCL23,SFTPD,SLIT3,SPN,SEMA3B,FGF18,SEMA5A,SLIT2,FEZ1,SEMA3E,DOCK4,FLRT3,C5AR2,SHC3,ROBO4,SEMA3G,CXCL16,NTN4,MMP28,SHANK3,WNT3A,ECSCR
6_Member	GO Biological Processes	GO:0042330	taxis	-10.9752	-7.9077	49/658	177,240,284,566,1441,1524,1808,1839,1901,1906,1910,2115,2277,2358,2920,2921,3082,3491,3730,4628,5144,5168,5196,5319,6092,6358,6361,6368,6441,6586,6693,7869,8817,9037,9353,9638,9723,9732,23767,27202,53358,54538,56920,58191,59277,79148,85358,89780,641700	AGER,ALOX5,ANGPT1,AZU1,CSF3R,CX3CR1,DPYSL2,HBEGF,S1PR1,EDN1,EDNRB,ETV1,VEGFD,FPR2,CXCL2,CXCL3,HGF,CCN1,ANOS1,MYH10,PDE4D,ENPP2,PF4,PLA2G1B,ROBO2,CCL14,CCL17,CCL23,SFTPD,SLIT3,SPN,SEMA3B,FGF18,SEMA5A,SLIT2,FEZ1,SEMA3E,DOCK4,FLRT3,C5AR2,SHC3,ROBO4,SEMA3G,CXCL16,NTN4,MMP28,SHANK3,WNT3A,ECSCR
6_Member	GO Biological Processes	GO:0050900	leukocyte migration	-10.0692	-7.17011	41/518	177,240,284,566,653,857,947,1088,1441,1524,1901,1906,1910,2277,2358,2920,2921,2995,3383,4973,5144,5175,5196,5319,6358,6361,6368,6403,6441,6566,6693,7010,7056,9353,27202,54210,58191,79148,90865,90952,91662	AGER,ALOX5,ANGPT1,AZU1,BMP5,CAV1,CD34,CEACAM8,CSF3R,CX3CR1,S1PR1,EDN1,EDNRB,VEGFD,FPR2,CXCL2,CXCL3,GYPC,ICAM1,OLR1,PDE4D,PECAM1,PF4,PLA2G1B,CCL14,CCL17,CCL23,SELP,SFTPD,SLC16A1,SPN,TEK,THBD,SLIT2,C5AR2,TREM1,CXCL16,MMP28,IL33,ESAM,NLRP12
6_Member	GO Biological Processes	GO:0060326	cell chemotaxis	-7.63539	-5.0295	27/312	240,566,1441,1524,1839,1901,1906,1910,2277,2358,2920,2921,3082,5144,5196,5319,6358,6361,6368,6441,8817,9037,9353,9732,27202,58191,79148	ALOX5,AZU1,CSF3R,CX3CR1,HBEGF,S1PR1,EDN1,EDNRB,VEGFD,FPR2,CXCL2,CXCL3,HGF,PDE4D,PF4,PLA2G1B,CCL14,CCL17,CCL23,SFTPD,FGF18,SEMA5A,SLIT2,DOCK4,C5AR2,CXCL16,MMP28
6_Member	Reactome Gene Sets	R-HSA-500792	GPCR ligand binding	-7.54784	-4.95746	34/467	153,154,554,976,1524,1604,1901,1906,1910,2015,2358,2791,2865,2920,2921,5196,5739,6361,6368,7433,7472,8322,8862,9002,10203,10266,10268,10316,27202,58191,59350,84658,89780,338557	ADRB1,ADRB2,AVPR2,ADGRE5,CX3CR1,CD55,S1PR1,EDN1,EDNRB,ADGRE1,FPR2,GNG11,FFAR3,CXCL2,CXCL3,PF4,PTGIR,CCL17,CCL23,VIPR1,WNT2,FZD4,APLN,F2RL3,CALCRL,RAMP2,RAMP3,NMUR1,C5AR2,CXCL16,RXFP1,ADGRE3,WNT3A,FFAR4
6_Member	GO Biological Processes	GO:0097529	myeloid leukocyte migration	-6.65597	-4.18088	21/224	177,566,1441,1524,1906,1910,2277,2358,2920,2921,5144,5175,5196,5319,6358,6361,6368,6441,9353,27202,79148	AGER,AZU1,CSF3R,CX3CR1,EDN1,EDNRB,VEGFD,FPR2,CXCL2,CXCL3,PDE4D,PECAM1,PF4,PLA2G1B,CCL14,CCL17,CCL23,SFTPD,SLIT2,C5AR2,MMP28
6_Member	GO Biological Processes	GO:0030595	leukocyte chemotaxis	-6.3704	-3.97839	21/233	240,566,1441,1901,1906,1910,2277,2358,2920,2921,5144,5196,5319,6358,6361,6368,6441,9353,27202,58191,79148	ALOX5,AZU1,CSF3R,S1PR1,EDN1,EDNRB,VEGFD,FPR2,CXCL2,CXCL3,PDE4D,PF4,PLA2G1B,CCL14,CCL17,CCL23,SFTPD,SLIT2,C5AR2,CXCL16,MMP28
6_Member	KEGG Pathway	hsa04060	Cytokine-cytokine receptor interaction	-6.07609	-3.74793	25/328	94,651,653,654,1440,1441,1524,2277,2324,2662,2920,2921,3082,3459,3977,4352,5196,6358,6361,6368,7048,8809,9173,58191,90865	ACVRL1,BMP3,BMP5,BMP6,CSF3,CSF3R,CX3CR1,VEGFD,FLT4,GDF10,CXCL2,CXCL3,HGF,IFNGR1,LIFR,MPL,PF4,CCL14,CCL17,CCL23,TGFBR2,IL18R1,IL1RL1,CXCL16,IL33
6_Member	GO Biological Processes	GO:0030593	neutrophil chemotaxis	-5.01278	-2.91065	12/103	1441,1906,2920,2921,5144,5196,5319,6358,6361,6368,9353,27202	CSF3R,EDN1,CXCL2,CXCL3,PDE4D,PF4,PLA2G1B,CCL14,CCL17,CCL23,SLIT2,C5AR2
6_Member	GO Biological Processes	GO:0070098	chemokine-mediated signaling pathway	-4.93805	-2.84947	11/88	1524,1906,2920,2921,4352,5196,6358,6361,6368,6586,9353	CX3CR1,EDN1,CXCL2,CXCL3,MPL,PF4,CCL14,CCL17,CCL23,SLIT3,SLIT2
6_Member	GO Biological Processes	GO:1990266	neutrophil migration	-4.9123	-2.83379	13/123	1441,1906,2920,2921,5144,5175,5196,5319,6358,6361,6368,9353,27202	CSF3R,EDN1,CXCL2,CXCL3,PDE4D,PECAM1,PF4,PLA2G1B,CCL14,CCL17,CCL23,SLIT2,C5AR2
6_Member	GO Biological Processes	GO:1990868	response to chemokine	-4.53308	-2.55974	11/97	1524,1906,2920,2921,4352,5196,6358,6361,6368,6586,9353	CX3CR1,EDN1,CXCL2,CXCL3,MPL,PF4,CCL14,CCL17,CCL23,SLIT3,SLIT2
6_Member	GO Biological Processes	GO:1990869	cellular response to chemokine	-4.53308	-2.55974	11/97	1524,1906,2920,2921,4352,5196,6358,6361,6368,6586,9353	CX3CR1,EDN1,CXCL2,CXCL3,MPL,PF4,CCL14,CCL17,CCL23,SLIT3,SLIT2
6_Member	Reactome Gene Sets	R-HSA-373076	Class A/1 (Rhodopsin-like receptors)	-4.414	-2.48966	22/335	153,154,554,1524,1901,1906,1910,2358,2865,2920,2921,5196,5739,6361,6368,8862,9002,10316,27202,58191,59350,338557	ADRB1,ADRB2,AVPR2,CX3CR1,S1PR1,EDN1,EDNRB,FPR2,FFAR3,CXCL2,CXCL3,PF4,PTGIR,CCL17,CCL23,APLN,F2RL3,NMUR1,C5AR2,CXCL16,RXFP1,FFAR4
6_Member	Reactome Gene Sets	R-HSA-375276	Peptide ligand-binding receptors	-4.33648	-2.44354	16/201	554,1524,1906,1910,2358,2920,2921,5196,6361,6368,8862,9002,10316,27202,58191,59350	AVPR2,CX3CR1,EDN1,EDNRB,FPR2,CXCL2,CXCL3,PF4,CCL17,CCL23,APLN,F2RL3,NMUR1,C5AR2,CXCL16,RXFP1
6_Member	GO Biological Processes	GO:0071621	granulocyte chemotaxis	-4.09914	-2.24843	12/127	1441,1906,2920,2921,5144,5196,5319,6358,6361,6368,9353,27202	CSF3R,EDN1,CXCL2,CXCL3,PDE4D,PF4,PLA2G1B,CCL14,CCL17,CCL23,SLIT2,C5AR2
6_Member	GO Biological Processes	GO:0097530	granulocyte migration	-3.9745	-2.14991	13/151	1441,1906,2920,2921,5144,5175,5196,5319,6358,6361,6368,9353,27202	CSF3R,EDN1,CXCL2,CXCL3,PDE4D,PECAM1,PF4,PLA2G1B,CCL14,CCL17,CCL23,SLIT2,C5AR2
6_Member	KEGG Pathway	ko04060	Cytokine-cytokine receptor interaction	-3.80219	-2.01942	18/270	1440,1441,1524,2277,2324,2920,2921,3082,3459,3977,4352,5196,6358,6361,6368,7048,8809,58191	CSF3,CSF3R,CX3CR1,VEGFD,FLT4,CXCL2,CXCL3,HGF,IFNGR1,LIFR,MPL,PF4,CCL14,CCL17,CCL23,TGFBR2,IL18R1,CXCL16
6_Member	KEGG Pathway	hsa04062	Chemokine signaling pathway	-3.76687	-1.98764	15/202	408,1524,2791,2869,2920,2921,4792,5196,6035,6358,6361,6368,53358,58191,196883	ARRB1,CX3CR1,GNG11,GRK5,CXCL2,CXCL3,NFKBIA,PF4,RNASE1,CCL14,CCL17,CCL23,SHC3,CXCL16,ADCY4
6_Member	KEGG Pathway	ko04062	Chemokine signaling pathway	-3.7131	-1.94087	14/182	408,1524,2791,2869,2920,2921,4792,5196,6358,6361,6368,53358,58191,196883	ARRB1,CX3CR1,GNG11,GRK5,CXCL2,CXCL3,NFKBIA,PF4,CCL14,CCL17,CCL23,SHC3,CXCL16,ADCY4
6_Member	Reactome Gene Sets	R-HSA-418594	G alpha (i) signalling events	-2.49663	-1.00286	20/407	1524,1901,2262,2358,2791,2920,2921,4023,5143,5144,5196,5957,6368,8786,8862,10316,58191,196883,338328,388531	CX3CR1,S1PR1,GPC5,FPR2,GNG11,CXCL2,CXCL3,LPL,PDE4C,PDE4D,PF4,RCVRN,CCL23,RGS11,APLN,NMUR1,CXCL16,ADCY4,GPIHBP1,RGS9BP
6_Member	Reactome Gene Sets	R-HSA-380108	Chemokine receptors bind chemokines	-2.47095	-0.983233	6/59	1524,2920,2921,5196,6361,58191	CX3CR1,CXCL2,CXCL3,PF4,CCL17,CXCL16
7_Summary	Canonical Pathways	M5884	NABA CORE MATRISOME	-10.8574	-7.81215	30/275	1285,1286,1305,2202,3491,3730,4053,4148,4239,6586,7450,9353,9806,10085,10319,22854,22915,51232,59277,79625,79812,83872,131873,168667,203190,256076,285313,340419,342035,343637	COL4A3,COL4A4,COL13A1,EFEMP1,CCN1,ANOS1,LTBP2,MATN3,MFAP4,SLIT3,VWF,SLIT2,SPOCK2,EDIL3,LAMC3,NTNG1,MMRN1,CRIM1,NTN4,NDNF,MMRN2,HMCN1,COL6A6,BMPER,LGI3,COL6A5,IGSF10,RSPO2,GLDN,RSPO4
7_Member	Canonical Pathways	M5884	NABA CORE MATRISOME	-10.8574	-7.81215	30/275	1285,1286,1305,2202,3491,3730,4053,4148,4239,6586,7450,9353,9806,10085,10319,22854,22915,51232,59277,79625,79812,83872,131873,168667,203190,256076,285313,340419,342035,343637	COL4A3,COL4A4,COL13A1,EFEMP1,CCN1,ANOS1,LTBP2,MATN3,MFAP4,SLIT3,VWF,SLIT2,SPOCK2,EDIL3,LAMC3,NTNG1,MMRN1,CRIM1,NTN4,NDNF,MMRN2,HMCN1,COL6A6,BMPER,LGI3,COL6A5,IGSF10,RSPO2,GLDN,RSPO4
7_Member	Canonical Pathways	M3008	NABA ECM GLYCOPROTEINS	-9.84751	-6.99262	24/196	2202,3491,3730,4053,4148,4239,6586,7450,9353,10085,10319,22854,22915,51232,59277,79625,79812,83872,168667,203190,285313,340419,342035,343637	EFEMP1,CCN1,ANOS1,LTBP2,MATN3,MFAP4,SLIT3,VWF,SLIT2,EDIL3,LAMC3,NTNG1,MMRN1,CRIM1,NTN4,NDNF,MMRN2,HMCN1,BMPER,LGI3,IGSF10,RSPO2,GLDN,RSPO4
8_Summary	GO Biological Processes	GO:0031589	cell-substrate adhesion	-10.4711	-7.48652	34/360	94,284,947,948,1305,2013,3037,3491,4091,4739,5175,7010,7450,8322,8515,9723,9806,10085,10232,10319,10395,10894,11170,22854,22998,23499,25975,54749,55698,56999,57091,59277,79625,79834	ACVRL1,ANGPT1,CD34,CD36,COL13A1,EMP2,HAS2,CCN1,SMAD6,NEDD9,PECAM1,TEK,VWF,FZD4,ITGA10,SEMA3E,SPOCK2,EDIL3,MSLN,LAMC3,DLC1,LYVE1,FAM107A,NTNG1,LIMCH1,MACF1,EGFL6,EPDR1,RADIL,ADAMTS9,CASS4,NTN4,NDNF,PEAK1
8_Member	GO Biological Processes	GO:0031589	cell-substrate adhesion	-10.4711	-7.48652	34/360	94,284,947,948,1305,2013,3037,3491,4091,4739,5175,7010,7450,8322,8515,9723,9806,10085,10232,10319,10395,10894,11170,22854,22998,23499,25975,54749,55698,56999,57091,59277,79625,79834	ACVRL1,ANGPT1,CD34,CD36,COL13A1,EMP2,HAS2,CCN1,SMAD6,NEDD9,PECAM1,TEK,VWF,FZD4,ITGA10,SEMA3E,SPOCK2,EDIL3,MSLN,LAMC3,DLC1,LYVE1,FAM107A,NTNG1,LIMCH1,MACF1,EGFL6,EPDR1,RADIL,ADAMTS9,CASS4,NTN4,NDNF,PEAK1
8_Member	GO Biological Processes	GO:0010810	regulation of cell-substrate adhesion	-5.63657	-3.40091	19/217	94,948,2013,3037,3491,4739,7010,8322,9723,9806,10085,10395,11170,22998,23499,25975,57091,79625,79834	ACVRL1,CD36,EMP2,HAS2,CCN1,NEDD9,TEK,FZD4,SEMA3E,SPOCK2,EDIL3,DLC1,FAM107A,LIMCH1,MACF1,EGFL6,CASS4,NDNF,PEAK1
8_Member	GO Biological Processes	GO:0007160	cell-matrix adhesion	-4.67742	-2.66892	18/231	94,947,948,1305,2013,5175,7010,8515,9723,10232,10395,10894,11170,22998,23499,54749,56999,79834	ACVRL1,CD34,CD36,COL13A1,EMP2,PECAM1,TEK,ITGA10,SEMA3E,MSLN,DLC1,LYVE1,FAM107A,LIMCH1,MACF1,EPDR1,ADAMTS9,PEAK1
8_Member	GO Biological Processes	GO:0010811	positive regulation of cell-substrate adhesion	-3.62588	-1.87512	11/122	948,2013,3037,3491,4739,7010,9806,10085,25975,57091,79625	CD36,EMP2,HAS2,CCN1,NEDD9,TEK,SPOCK2,EDIL3,EGFL6,CASS4,NDNF
8_Member	GO Biological Processes	GO:0034446	substrate adhesion-dependent cell spreading	-3.5054	-1.78446	10/106	3037,4739,7010,8322,10319,22854,55698,57091,59277,79834	HAS2,NEDD9,TEK,FZD4,LAMC3,NTNG1,RADIL,CASS4,NTN4,PEAK1
9_Summary	GO Biological Processes	GO:0030155	regulation of cell adhesion	-10.2232	-7.29189	51/738	94,177,240,284,566,654,857,948,1604,1901,2013,2615,3037,3383,3491,4008,4739,4855,5420,5793,5914,6403,6441,6693,7010,7048,7052,7704,8322,9037,9308,9723,9806,10085,10272,10326,10395,11170,11326,22998,23499,25975,27289,28984,55824,57091,79625,79834,84807,89780,140706,1524,4973,5175,64116,8809,825,4352,7056,9173,11027,57864,84106,90865,114757,120892,221395	ACVRL1,AGER,ALOX5,ANGPT1,AZU1,BMP6,CAV1,CD36,CD55,S1PR1,EMP2,LRRC32,HAS2,ICAM1,CCN1,LMO7,NEDD9,NOTCH4,PODXL,PTPRG,RARA,SELP,SFTPD,SPN,TEK,TGFBR2,TGM2,ZBTB16,FZD4,SEMA5A,CD83,SEMA3E,SPOCK2,EDIL3,FSTL3,SIRPB1,DLC1,FAM107A,VSIG4,LIMCH1,MACF1,EGFL6,RND1,RGCC,PAG1,CASS4,NDNF,PEAK1,NFKBID,WNT3A,CCM2L,CX3CR1,OLR1,PECAM1,SLC39A8,IL18R1,CAPN3,MPL,THBD,IL1RL1,LILRA2,SLC46A2,PRAM1,IL33,CYGB,LRRK2,ADGRF5
9_Member	GO Biological Processes	GO:0030155	regulation of cell adhesion	-10.2232	-7.29189	51/738	94,177,240,284,566,654,857,948,1604,1901,2013,2615,3037,3383,3491,4008,4739,4855,5420,5793,5914,6403,6441,6693,7010,7048,7052,7704,8322,9037,9308,9723,9806,10085,10272,10326,10395,11170,11326,22998,23499,25975,27289,28984,55824,57091,79625,79834,84807,89780,140706	ACVRL1,AGER,ALOX5,ANGPT1,AZU1,BMP6,CAV1,CD36,CD55,S1PR1,EMP2,LRRC32,HAS2,ICAM1,CCN1,LMO7,NEDD9,NOTCH4,PODXL,PTPRG,RARA,SELP,SFTPD,SPN,TEK,TGFBR2,TGM2,ZBTB16,FZD4,SEMA5A,CD83,SEMA3E,SPOCK2,EDIL3,FSTL3,SIRPB1,DLC1,FAM107A,VSIG4,LIMCH1,MACF1,EGFL6,RND1,RGCC,PAG1,CASS4,NDNF,PEAK1,NFKBID,WNT3A,CCM2L
9_Member	GO Biological Processes	GO:0045785	positive regulation of cell adhesion	-5.89156	-3.60986	29/428	177,240,284,566,857,948,1604,2013,3037,3383,3491,4739,5420,5914,6403,7010,7048,7052,7704,9308,9806,10085,10272,10326,25975,57091,79625,84807,89780	AGER,ALOX5,ANGPT1,AZU1,CAV1,CD36,CD55,EMP2,HAS2,ICAM1,CCN1,NEDD9,PODXL,RARA,SELP,TEK,TGFBR2,TGM2,ZBTB16,CD83,SPOCK2,EDIL3,FSTL3,SIRPB1,EGFL6,CASS4,NDNF,NFKBID,WNT3A
9_Member	GO Biological Processes	GO:0022407	regulation of cell-cell adhesion	-4.30244	-2.41558	26/441	177,240,654,857,1604,2615,3037,3383,4855,5420,5793,5914,6403,6441,6693,7048,7704,9308,10272,10326,11326,28984,55824,84807,89780,140706	AGER,ALOX5,BMP6,CAV1,CD55,LRRC32,HAS2,ICAM1,NOTCH4,PODXL,PTPRG,RARA,SELP,SFTPD,SPN,TGFBR2,ZBTB16,CD83,FSTL3,SIRPB1,VSIG4,RGCC,PAG1,NFKBID,WNT3A,CCM2L
9_Member	GO Biological Processes	GO:0007159	leukocyte cell-cell adhesion	-3.88621	-2.08153	22/364	177,240,857,1524,1604,2615,3037,3383,4973,5175,5914,6403,6441,6693,7048,7704,9308,10326,11326,55824,64116,84807	AGER,ALOX5,CAV1,CX3CR1,CD55,LRRC32,HAS2,ICAM1,OLR1,PECAM1,RARA,SELP,SFTPD,SPN,TGFBR2,ZBTB16,CD83,SIRPB1,VSIG4,PAG1,SLC39A8,NFKBID
9_Member	GO Biological Processes	GO:1903037	regulation of leukocyte cell-cell adhesion	-2.79548	-1.23653	18/329	177,240,857,1604,2615,3037,3383,5914,6403,6441,6693,7048,7704,9308,10326,11326,55824,84807	AGER,ALOX5,CAV1,CD55,LRRC32,HAS2,ICAM1,RARA,SELP,SFTPD,SPN,TGFBR2,ZBTB16,CD83,SIRPB1,VSIG4,PAG1,NFKBID
9_Member	GO Biological Processes	GO:0022409	positive regulation of cell-cell adhesion	-2.75124	-1.20364	16/279	177,240,857,1604,3037,3383,5420,5914,6403,7048,7704,9308,10272,10326,84807,89780	AGER,ALOX5,CAV1,CD55,HAS2,ICAM1,PODXL,RARA,SELP,TGFBR2,ZBTB16,CD83,FSTL3,SIRPB1,NFKBID,WNT3A
9_Member	GO Biological Processes	GO:2000516	positive regulation of CD4-positive, alpha-beta T cell activation	-2.73212	-1.18864	5/36	1604,5914,7048,9308,84807	CD55,RARA,TGFBR2,CD83,NFKBID
9_Member	GO Biological Processes	GO:0035710	CD4-positive, alpha-beta T cell activation	-2.53998	-1.03363	8/97	177,1604,5914,6693,7048,8809,9308,84807	AGER,CD55,RARA,SPN,TGFBR2,IL18R1,CD83,NFKBID
9_Member	GO Biological Processes	GO:0046635	positive regulation of alpha-beta T cell activation	-2.32864	-0.882755	6/63	1604,5914,7048,7704,9308,84807	CD55,RARA,TGFBR2,ZBTB16,CD83,NFKBID
9_Member	GO Biological Processes	GO:2000514	regulation of CD4-positive, alpha-beta T cell activation	-2.32864	-0.882755	6/63	177,1604,5914,7048,9308,84807	AGER,CD55,RARA,TGFBR2,CD83,NFKBID
9_Member	GO Biological Processes	GO:0046638	positive regulation of alpha-beta T cell differentiation	-2.21959	-0.799675	5/47	5914,7048,7704,9308,84807	RARA,TGFBR2,ZBTB16,CD83,NFKBID
9_Member	GO Biological Processes	GO:1903039	positive regulation of leukocyte cell-cell adhesion	-2.20964	-0.792169	13/235	177,240,857,1604,3037,3383,5914,6403,7048,7704,9308,10326,84807	AGER,ALOX5,CAV1,CD55,HAS2,ICAM1,RARA,SELP,TGFBR2,ZBTB16,CD83,SIRPB1,NFKBID
9_Member	GO Biological Processes	GO:0050865	regulation of cell activation	-2.13705	-0.740671	27/653	177,825,857,1604,2615,4352,5914,6403,6441,6693,7048,7056,7704,9173,9308,10326,11027,11326,55824,57864,84106,84807,89780,90865,114757,120892,221395	AGER,CAPN3,CAV1,CD55,LRRC32,MPL,RARA,SELP,SFTPD,SPN,TGFBR2,THBD,ZBTB16,IL1RL1,CD83,SIRPB1,LILRA2,VSIG4,PAG1,SLC46A2,PRAM1,NFKBID,WNT3A,IL33,CYGB,LRRK2,ADGRF5
10_Summary	GO Biological Processes	GO:0070848	response to growth factor	-9.99491	-7.11105	51/749	94,306,653,654,857,858,1003,1524,1906,2022,2277,2324,2348,2615,2662,3037,3082,3491,3730,4053,4091,7048,7122,7123,7472,8322,8692,8817,8862,9353,9365,9592,9638,10266,10272,23767,26508,27063,55273,57530,57608,64399,79633,79652,79674,79812,81848,83891,147372,168667,406888,651,84913	ACVRL1,ANXA3,BMP5,BMP6,CAV1,CAV2,CDH5,CX3CR1,EDN1,ENG,VEGFD,FLT4,FOLR1,LRRC32,GDF10,HAS2,HGF,CCN1,ANOS1,LTBP2,SMAD6,TGFBR2,CLDN5,CLEC3B,WNT2,FZD4,HYAL2,FGF18,APLN,SLIT2,KL,IER2,FEZ1,RAMP2,FSTL3,FLRT3,HEYL,ANKRD1,TMEM100,CGN,JCAD,HHIP,FAT4,TMEM204,VEPH1,MMRN2,SPRY4,SNX25,CCBE1,BMPER,MIRLET7F1,BMP3,ATOH8
10_Member	GO Biological Processes	GO:0070848	response to growth factor	-9.99491	-7.11105	51/749	94,306,653,654,857,858,1003,1524,1906,2022,2277,2324,2348,2615,2662,3037,3082,3491,3730,4053,4091,7048,7122,7123,7472,8322,8692,8817,8862,9353,9365,9592,9638,10266,10272,23767,26508,27063,55273,57530,57608,64399,79633,79652,79674,79812,81848,83891,147372,168667,406888	ACVRL1,ANXA3,BMP5,BMP6,CAV1,CAV2,CDH5,CX3CR1,EDN1,ENG,VEGFD,FLT4,FOLR1,LRRC32,GDF10,HAS2,HGF,CCN1,ANOS1,LTBP2,SMAD6,TGFBR2,CLDN5,CLEC3B,WNT2,FZD4,HYAL2,FGF18,APLN,SLIT2,KL,IER2,FEZ1,RAMP2,FSTL3,FLRT3,HEYL,ANKRD1,TMEM100,CGN,JCAD,HHIP,FAT4,TMEM204,VEPH1,MMRN2,SPRY4,SNX25,CCBE1,BMPER,MIRLET7F1
10_Member	GO Biological Processes	GO:0071363	cellular response to growth factor stimulus	-9.63516	-6.79406	49/719	94,653,654,857,858,1003,1524,1906,2022,2277,2324,2348,2615,2662,3037,3082,3491,3730,4053,4091,7048,7122,7123,7472,8322,8692,8817,8862,9353,9365,9638,10266,10272,23767,26508,27063,55273,57530,57608,64399,79633,79652,79674,79812,81848,83891,147372,168667,406888	ACVRL1,BMP5,BMP6,CAV1,CAV2,CDH5,CX3CR1,EDN1,ENG,VEGFD,FLT4,FOLR1,LRRC32,GDF10,HAS2,HGF,CCN1,ANOS1,LTBP2,SMAD6,TGFBR2,CLDN5,CLEC3B,WNT2,FZD4,HYAL2,FGF18,APLN,SLIT2,KL,FEZ1,RAMP2,FSTL3,FLRT3,HEYL,ANKRD1,TMEM100,CGN,JCAD,HHIP,FAT4,TMEM204,VEPH1,MMRN2,SPRY4,SNX25,CCBE1,BMPER,MIRLET7F1
10_Member	GO Biological Processes	GO:0071560	cellular response to transforming growth factor beta stimulus	-6.28786	-3.90539	22/256	94,857,858,1003,1524,1906,2022,2348,2615,2662,4053,4091,7048,7122,7123,7472,8692,27063,57530,79674,83891,406888	ACVRL1,CAV1,CAV2,CDH5,CX3CR1,EDN1,ENG,FOLR1,LRRC32,GDF10,LTBP2,SMAD6,TGFBR2,CLDN5,CLEC3B,WNT2,HYAL2,ANKRD1,CGN,VEPH1,SNX25,MIRLET7F1
10_Member	GO Biological Processes	GO:0071559	response to transforming growth factor beta	-6.11734	-3.77541	22/262	94,857,858,1003,1524,1906,2022,2348,2615,2662,4053,4091,7048,7122,7123,7472,8692,27063,57530,79674,83891,406888	ACVRL1,CAV1,CAV2,CDH5,CX3CR1,EDN1,ENG,FOLR1,LRRC32,GDF10,LTBP2,SMAD6,TGFBR2,CLDN5,CLEC3B,WNT2,HYAL2,ANKRD1,CGN,VEPH1,SNX25,MIRLET7F1
10_Member	GO Biological Processes	GO:0090287	regulation of cellular response to growth factor stimulus	-5.95344	-3.64958	24/311	94,857,858,1003,2022,2348,3491,4091,7048,8322,8817,8862,9353,10272,57608,64399,79652,79674,79812,81848,83891,147372,168667,406888	ACVRL1,CAV1,CAV2,CDH5,ENG,FOLR1,CCN1,SMAD6,TGFBR2,FZD4,FGF18,APLN,SLIT2,FSTL3,JCAD,HHIP,TMEM204,VEPH1,MMRN2,SPRY4,SNX25,CCBE1,BMPER,MIRLET7F1
10_Member	GO Biological Processes	GO:0007178	transmembrane receptor protein serine/threonine kinase signaling pathway	-4.78766	-2.74826	24/364	94,651,653,654,857,858,1003,2022,2348,2615,2662,3491,4053,4091,7048,7122,10272,55273,57530,79674,83891,84913,168667,406888	ACVRL1,BMP3,BMP5,BMP6,CAV1,CAV2,CDH5,ENG,FOLR1,LRRC32,GDF10,CCN1,LTBP2,SMAD6,TGFBR2,CLDN5,FSTL3,TMEM100,CGN,VEPH1,SNX25,ATOH8,BMPER,MIRLET7F1
10_Member	GO Biological Processes	GO:0007179	transforming growth factor beta receptor signaling pathway	-4.20861	-2.34092	16/206	94,857,858,1003,2022,2348,2615,2662,4053,4091,7048,7122,57530,79674,83891,406888	ACVRL1,CAV1,CAV2,CDH5,ENG,FOLR1,LRRC32,GDF10,LTBP2,SMAD6,TGFBR2,CLDN5,CGN,VEPH1,SNX25,MIRLET7F1
10_Member	GO Biological Processes	GO:0090092	regulation of transmembrane receptor protein serine/threonine kinase signaling pathway	-4.0934	-2.24546	18/256	94,651,653,654,857,858,1003,2022,2348,2662,3491,4091,7048,10272,79674,83891,168667,406888	ACVRL1,BMP3,BMP5,BMP6,CAV1,CAV2,CDH5,ENG,FOLR1,GDF10,CCN1,SMAD6,TGFBR2,FSTL3,VEPH1,SNX25,BMPER,MIRLET7F1
10_Member	GO Biological Processes	GO:0090288	negative regulation of cellular response to growth factor stimulus	-3.18267	-1.52036	13/182	857,858,4091,7048,8862,9353,10272,79674,79812,81848,83891,168667,406888	CAV1,CAV2,SMAD6,TGFBR2,APLN,SLIT2,FSTL3,VEPH1,MMRN2,SPRY4,SNX25,BMPER,MIRLET7F1
10_Member	GO Biological Processes	GO:0017015	regulation of transforming growth factor beta receptor signaling pathway	-2.32466	-0.879859	9/128	857,858,2022,2348,4091,7048,79674,83891,406888	CAV1,CAV2,ENG,FOLR1,SMAD6,TGFBR2,VEPH1,SNX25,MIRLET7F1
10_Member	GO Biological Processes	GO:1903844	regulation of cellular response to transforming growth factor beta stimulus	-2.28088	-0.847407	9/130	857,858,2022,2348,4091,7048,79674,83891,406888	CAV1,CAV2,ENG,FOLR1,SMAD6,TGFBR2,VEPH1,SNX25,MIRLET7F1
10_Member	GO Biological Processes	GO:0030512	negative regulation of transforming growth factor beta receptor signaling pathway	-2.22649	-0.805035	7/87	857,858,4091,7048,79674,83891,406888	CAV1,CAV2,SMAD6,TGFBR2,VEPH1,SNX25,MIRLET7F1
10_Member	GO Biological Processes	GO:0090101	negative regulation of transmembrane receptor protein serine/threonine kinase signaling pathway	-2.21703	-0.797631	9/133	857,858,4091,7048,10272,79674,83891,168667,406888	CAV1,CAV2,SMAD6,TGFBR2,FSTL3,VEPH1,SNX25,BMPER,MIRLET7F1
10_Member	GO Biological Processes	GO:1903845	negative regulation of cellular response to transforming growth factor beta stimulus	-2.17323	-0.769972	7/89	857,858,4091,7048,79674,83891,406888	CAV1,CAV2,SMAD6,TGFBR2,VEPH1,SNX25,MIRLET7F1
11_Summary	GO Biological Processes	GO:0003018	vascular process in circulatory system	-9.30152	-6.48675	22/175	153,154,284,554,566,654,857,1003,1636,1906,1910,3383,4881,5743,6532,7010,7122,8862,9353,9732,10266,342527,94,947,1359,2013,2865,4883,5144,5468,83988,6505,10203,10316,51196,1193,7134,7136,6588,7222,84676	ADRB1,ADRB2,ANGPT1,AVPR2,AZU1,BMP6,CAV1,CDH5,ACE,EDN1,EDNRB,ICAM1,NPR1,PTGS2,SLC6A4,TEK,CLDN5,APLN,SLIT2,DOCK4,RAMP2,SMTNL2,ACVRL1,CD34,CPA3,EMP2,FFAR3,NPR3,PDE4D,PPARG,NCALD,SLC1A1,CALCRL,NMUR1,PLCE1,CLIC2,TNNC1,TNNI2,SLN,TRPC3,TRIM63
11_Member	GO Biological Processes	GO:0003018	vascular process in circulatory system	-9.30152	-6.48675	22/175	153,154,284,554,566,654,857,1003,1636,1906,1910,3383,4881,5743,6532,7010,7122,8862,9353,9732,10266,342527	ADRB1,ADRB2,ANGPT1,AVPR2,AZU1,BMP6,CAV1,CDH5,ACE,EDN1,EDNRB,ICAM1,NPR1,PTGS2,SLC6A4,TEK,CLDN5,APLN,SLIT2,DOCK4,RAMP2,SMTNL2
11_Member	GO Biological Processes	GO:0008217	regulation of blood pressure	-6.62244	-4.16828	19/187	94,153,154,554,947,1359,1636,1906,1910,2013,2865,4881,4883,5144,5468,5743,8862,10266,83988	ACVRL1,ADRB1,ADRB2,AVPR2,CD34,CPA3,ACE,EDN1,EDNRB,EMP2,FFAR3,NPR1,NPR3,PDE4D,PPARG,PTGS2,APLN,RAMP2,NCALD
11_Member	GO Biological Processes	GO:0042310	vasoconstriction	-5.455	-3.25155	11/78	554,857,1636,1906,1910,3383,5743,6532,8862,9732,342527	AVPR2,CAV1,ACE,EDN1,EDNRB,ICAM1,PTGS2,SLC6A4,APLN,DOCK4,SMTNL2
11_Member	GO Biological Processes	GO:0097756	negative regulation of blood vessel diameter	-5.03528	-2.92707	11/86	554,857,1636,1906,1910,3383,5743,6532,8862,9732,342527	AVPR2,CAV1,ACE,EDN1,EDNRB,ICAM1,PTGS2,SLC6A4,APLN,DOCK4,SMTNL2
11_Member	GO Biological Processes	GO:0035296	regulation of tube diameter	-4.85852	-2.80452	14/143	153,154,554,857,1636,1906,1910,3383,4881,5743,6532,8862,9732,342527	ADRB1,ADRB2,AVPR2,CAV1,ACE,EDN1,EDNRB,ICAM1,NPR1,PTGS2,SLC6A4,APLN,DOCK4,SMTNL2
11_Member	GO Biological Processes	GO:0050880	regulation of blood vessel size	-4.85852	-2.80452	14/143	153,154,554,857,1636,1906,1910,3383,4881,5743,6532,8862,9732,342527	ADRB1,ADRB2,AVPR2,CAV1,ACE,EDN1,EDNRB,ICAM1,NPR1,PTGS2,SLC6A4,APLN,DOCK4,SMTNL2
11_Member	GO Biological Processes	GO:0097746	regulation of blood vessel diameter	-4.85852	-2.80452	14/143	153,154,554,857,1636,1906,1910,3383,4881,5743,6532,8862,9732,342527	ADRB1,ADRB2,AVPR2,CAV1,ACE,EDN1,EDNRB,ICAM1,NPR1,PTGS2,SLC6A4,APLN,DOCK4,SMTNL2
11_Member	GO Biological Processes	GO:0035150	regulation of tube size	-4.82396	-2.77655	14/144	153,154,554,857,1636,1906,1910,3383,4881,5743,6532,8862,9732,342527	ADRB1,ADRB2,AVPR2,CAV1,ACE,EDN1,EDNRB,ICAM1,NPR1,PTGS2,SLC6A4,APLN,DOCK4,SMTNL2
11_Member	GO Biological Processes	GO:0019229	regulation of vasoconstriction	-4.78949	-2.74826	9/60	554,857,1636,1906,3383,5743,8862,9732,342527	AVPR2,CAV1,ACE,EDN1,ICAM1,PTGS2,APLN,DOCK4,SMTNL2
11_Member	GO Biological Processes	GO:1903524	positive regulation of blood circulation	-4.73998	-2.71388	10/76	153,554,857,1906,3383,5144,5743,6505,8862,342527	ADRB1,AVPR2,CAV1,EDN1,ICAM1,PDE4D,PTGS2,SLC1A1,APLN,SMTNL2
11_Member	GO Biological Processes	GO:0031649	heat generation	-4.34779	-2.44723	5/17	153,154,1910,5743,8862	ADRB1,ADRB2,EDNRB,PTGS2,APLN
11_Member	GO Biological Processes	GO:0003044	regulation of systemic arterial blood pressure mediated by a chemical signal	-3.65207	-1.89688	7/50	153,154,554,1359,1636,1906,5144	ADRB1,ADRB2,AVPR2,CPA3,ACE,EDN1,PDE4D
11_Member	GO Biological Processes	GO:0006939	smooth muscle contraction	-3.40757	-1.7008	10/109	154,857,1906,1910,5144,5743,9732,10203,10316,51196	ADRB2,CAV1,EDN1,EDNRB,PDE4D,PTGS2,DOCK4,CALCRL,NMUR1,PLCE1
11_Member	GO Biological Processes	GO:0003073	regulation of systemic arterial blood pressure	-3.22307	-1.55442	9/95	153,154,554,1359,1636,1906,2013,5144,83988	ADRB1,ADRB2,AVPR2,CPA3,ACE,EDN1,EMP2,PDE4D,NCALD
11_Member	GO Biological Processes	GO:0045986	negative regulation of smooth muscle contraction	-3.15946	-1.50517	4/17	154,5743,9732,10203	ADRB2,PTGS2,DOCK4,CALCRL
11_Member	GO Biological Processes	GO:0006940	regulation of smooth muscle contraction	-2.94797	-1.34412	7/65	154,857,1906,5743,9732,10203,51196	ADRB2,CAV1,EDN1,PTGS2,DOCK4,CALCRL,PLCE1
11_Member	GO Biological Processes	GO:0045907	positive regulation of vasoconstriction	-2.84631	-1.27237	5/34	554,857,3383,5743,342527	AVPR2,CAV1,ICAM1,PTGS2,SMTNL2
11_Member	GO Biological Processes	GO:0031650	regulation of heat generation	-2.44153	-0.962976	3/13	1910,5743,8862	EDNRB,PTGS2,APLN
11_Member	GO Biological Processes	GO:0006937	regulation of muscle contraction	-2.38692	-0.923623	11/173	154,857,1193,1906,5144,5743,7134,7136,9732,10203,51196	ADRB2,CAV1,CLIC2,EDN1,PDE4D,PTGS2,TNNC1,TNNI2,DOCK4,CALCRL,PLCE1
11_Member	GO Biological Processes	GO:0045932	negative regulation of muscle contraction	-2.31865	-0.876029	4/28	154,5743,9732,10203	ADRB2,PTGS2,DOCK4,CALCRL
11_Member	GO Biological Processes	GO:0090257	regulation of muscle system process	-2.29523	-0.8596	14/256	154,857,1193,1906,5144,5743,6588,7134,7136,7222,9732,10203,51196,84676	ADRB2,CAV1,CLIC2,EDN1,PDE4D,PTGS2,SLN,TNNC1,TNNI2,TRPC3,DOCK4,CALCRL,PLCE1,TRIM63
12_Summary	GO Biological Processes	GO:0048729	tissue morphogenesis	-9.22135	-6.41917	46/668	94,104,653,1839,1901,1906,2022,2119,2295,2348,3082,3491,4855,5420,5914,6092,6886,6910,6943,7048,7052,7134,7273,7472,8322,8557,9353,9496,9723,9839,10395,23767,26508,27063,54345,54922,55273,57493,59277,64399,79633,83478,89780,90627,140706,340419,1305,120892	ACVRL1,ADARB1,BMP5,HBEGF,S1PR1,EDN1,ENG,ETV5,FOXF2,FOLR1,HGF,CCN1,NOTCH4,PODXL,RARA,ROBO2,TAL1,TBX5,TCF21,TGFBR2,TGM2,TNNC1,TTN,WNT2,FZD4,TCAP,SLIT2,TBX4,SEMA3E,ZEB2,DLC1,FLRT3,HEYL,ANKRD1,SOX18,RASIP1,TMEM100,HEG1,NTN4,HHIP,FAT4,ARHGAP24,WNT3A,STARD13,CCM2L,RSPO2,COL13A1,LRRK2
12_Member	GO Biological Processes	GO:0048729	tissue morphogenesis	-9.22135	-6.41917	46/668	94,104,653,1839,1901,1906,2022,2119,2295,2348,3082,3491,4855,5420,5914,6092,6886,6910,6943,7048,7052,7134,7273,7472,8322,8557,9353,9496,9723,9839,10395,23767,26508,27063,54345,54922,55273,57493,59277,64399,79633,83478,89780,90627,140706,340419	ACVRL1,ADARB1,BMP5,HBEGF,S1PR1,EDN1,ENG,ETV5,FOXF2,FOLR1,HGF,CCN1,NOTCH4,PODXL,RARA,ROBO2,TAL1,TBX5,TCF21,TGFBR2,TGM2,TNNC1,TTN,WNT2,FZD4,TCAP,SLIT2,TBX4,SEMA3E,ZEB2,DLC1,FLRT3,HEYL,ANKRD1,SOX18,RASIP1,TMEM100,HEG1,NTN4,HHIP,FAT4,ARHGAP24,WNT3A,STARD13,CCM2L,RSPO2
12_Member	GO Biological Processes	GO:0002009	morphogenesis of an epithelium	-6.20894	-3.84041	35/557	94,653,1839,1906,2022,2119,2295,2348,3082,3491,4855,5420,5914,6910,6943,7048,7052,7472,8322,8557,9353,9496,9723,9839,10395,23767,54345,54922,59277,64399,79633,83478,89780,90627,340419	ACVRL1,BMP5,HBEGF,EDN1,ENG,ETV5,FOXF2,FOLR1,HGF,CCN1,NOTCH4,PODXL,RARA,TBX5,TCF21,TGFBR2,TGM2,WNT2,FZD4,TCAP,SLIT2,TBX4,SEMA3E,ZEB2,DLC1,FLRT3,SOX18,RASIP1,NTN4,HHIP,FAT4,ARHGAP24,WNT3A,STARD13,RSPO2
12_Member	GO Biological Processes	GO:0001763	morphogenesis of a branching structure	-5.51112	-3.29197	18/201	1305,1906,2022,2119,3082,4855,6943,7048,7052,7472,9353,9723,54922,59277,64399,79633,120892,340419	COL13A1,EDN1,ENG,ETV5,HGF,NOTCH4,TCF21,TGFBR2,TGM2,WNT2,SLIT2,SEMA3E,RASIP1,NTN4,HHIP,FAT4,LRRK2,RSPO2
12_Member	GO Biological Processes	GO:0060562	epithelial tube morphogenesis	-5.48069	-3.26477	24/331	94,653,1906,2022,2119,2348,4855,5420,5914,6943,7048,7472,8557,9353,9723,9839,10395,54345,54922,64399,79633,89780,90627,340419	ACVRL1,BMP5,EDN1,ENG,ETV5,FOLR1,NOTCH4,PODXL,RARA,TCF21,TGFBR2,WNT2,TCAP,SLIT2,SEMA3E,ZEB2,DLC1,SOX18,RASIP1,HHIP,FAT4,WNT3A,STARD13,RSPO2
12_Member	GO Biological Processes	GO:0061138	morphogenesis of a branching epithelium	-4.71991	-2.70204	16/187	1906,2022,2119,3082,4855,6943,7048,7052,7472,9353,9723,54922,59277,64399,79633,340419	EDN1,ENG,ETV5,HGF,NOTCH4,TCF21,TGFBR2,TGM2,WNT2,SLIT2,SEMA3E,RASIP1,NTN4,HHIP,FAT4,RSPO2
12_Member	GO Biological Processes	GO:0048754	branching morphogenesis of an epithelial tube	-3.8599	-2.06265	13/155	1906,2022,2119,4855,6943,7048,7472,9353,9723,54922,64399,79633,340419	EDN1,ENG,ETV5,NOTCH4,TCF21,TGFBR2,WNT2,SLIT2,SEMA3E,RASIP1,HHIP,FAT4,RSPO2
13_Summary	Reactome Gene Sets	R-HSA-198933	Immunoregulatory interactions between a Lymphoid and a non-Lymphoid cell	-9.12455	-6.34275	19/132	947,3383,3384,3386,3802,3804,3811,6441,7087,8778,9437,10871,11027,51348,54210,81035,117157,126014,146894,3459,3809,6035,53358,948,4008,4360,4688,4792,7704,9398,55824,57520,81027,84676,153579	CD34,ICAM1,ICAM2,ICAM4,KIR2DL1,KIR2DL3,KIR3DL1,SFTPD,ICAM5,SIGLEC5,NCR1,CD300C,LILRA2,KLRF1,TREM1,COLEC12,SH2D1B,OSCAR,CD300LG,IFNGR1,KIR2DS4,RNASE1,SHC3,CD36,LMO7,MRC1,NCF2,NFKBIA,ZBTB16,CD101,PAG1,HECW2,TUBB1,TRIM63,BTNL9
13_Member	Reactome Gene Sets	R-HSA-198933	Immunoregulatory interactions between a Lymphoid and a non-Lymphoid cell	-9.12455	-6.34275	19/132	947,3383,3384,3386,3802,3804,3811,6441,7087,8778,9437,10871,11027,51348,54210,81035,117157,126014,146894	CD34,ICAM1,ICAM2,ICAM4,KIR2DL1,KIR2DL3,KIR3DL1,SFTPD,ICAM5,SIGLEC5,NCR1,CD300C,LILRA2,KLRF1,TREM1,COLEC12,SH2D1B,OSCAR,CD300LG
13_Member	KEGG Pathway	hsa04650	Natural killer cell mediated cytotoxicity	-2.9173	-1.3254	11/148	3383,3384,3459,3802,3804,3809,3811,6035,9437,53358,117157	ICAM1,ICAM2,IFNGR1,KIR2DL1,KIR2DL3,KIR2DS4,KIR3DL1,RNASE1,NCR1,SHC3,SH2D1B
13_Member	KEGG Pathway	ko04650	Natural killer cell mediated cytotoxicity	-2.73855	-1.19232	10/133	3383,3384,3459,3802,3804,3809,3811,9437,53358,117157	ICAM1,ICAM2,IFNGR1,KIR2DL1,KIR2DL3,KIR2DS4,KIR3DL1,NCR1,SHC3,SH2D1B
13_Member	Reactome Gene Sets	R-HSA-1280218	Adaptive Immune System	-2.32149	-0.877239	31/756	947,948,3383,3384,3386,3802,3804,3811,4008,4360,4688,4792,6441,7087,7704,8778,9398,9437,10871,11027,51348,54210,55824,57520,81027,81035,84676,117157,126014,146894,153579	CD34,CD36,ICAM1,ICAM2,ICAM4,KIR2DL1,KIR2DL3,KIR3DL1,LMO7,MRC1,NCF2,NFKBIA,SFTPD,ICAM5,ZBTB16,SIGLEC5,CD101,NCR1,CD300C,LILRA2,KLRF1,TREM1,PAG1,HECW2,TUBB1,COLEC12,TRIM63,SH2D1B,OSCAR,CD300LG,BTNL9
14_Summary	GO Biological Processes	GO:0048762	mesenchymal cell differentiation	-9.1208	-6.34275	25/230	94,653,1906,1910,2022,2295,2348,3037,3082,4855,6275,6910,6943,7048,7472,7869,8313,9037,9723,9839,26508,28984,55273,56920,152007,6092,89780,4091,5914,7122,54345,4628,56999,221395	ACVRL1,BMP5,EDN1,EDNRB,ENG,FOXF2,FOLR1,HAS2,HGF,NOTCH4,S100A4,TBX5,TCF21,TGFBR2,WNT2,SEMA3B,AXIN2,SEMA5A,SEMA3E,ZEB2,HEYL,RGCC,TMEM100,SEMA3G,GLIPR2,ROBO2,WNT3A,SMAD6,RARA,CLDN5,SOX18,MYH10,ADAMTS9,ADGRF5
14_Member	GO Biological Processes	GO:0048762	mesenchymal cell differentiation	-9.1208	-6.34275	25/230	94,653,1906,1910,2022,2295,2348,3037,3082,4855,6275,6910,6943,7048,7472,7869,8313,9037,9723,9839,26508,28984,55273,56920,152007	ACVRL1,BMP5,EDN1,EDNRB,ENG,FOXF2,FOLR1,HAS2,HGF,NOTCH4,S100A4,TBX5,TCF21,TGFBR2,WNT2,SEMA3B,AXIN2,SEMA5A,SEMA3E,ZEB2,HEYL,RGCC,TMEM100,SEMA3G,GLIPR2
14_Member	GO Biological Processes	GO:0060485	mesenchyme development	-8.30983	-5.63567	27/290	94,653,1906,1910,2022,2295,2348,3037,3082,4855,6092,6275,6910,6943,7048,7472,7869,8313,9037,9723,9839,26508,28984,55273,56920,89780,152007	ACVRL1,BMP5,EDN1,EDNRB,ENG,FOXF2,FOLR1,HAS2,HGF,NOTCH4,ROBO2,S100A4,TBX5,TCF21,TGFBR2,WNT2,SEMA3B,AXIN2,SEMA5A,SEMA3E,ZEB2,HEYL,RGCC,TMEM100,SEMA3G,WNT3A,GLIPR2
14_Member	GO Biological Processes	GO:0001837	epithelial to mesenchymal transition	-5.84262	-3.57191	16/153	94,653,2022,2295,3037,3082,4855,6275,6910,7048,7472,8313,26508,28984,55273,152007	ACVRL1,BMP5,ENG,FOXF2,HAS2,HGF,NOTCH4,S100A4,TBX5,TGFBR2,WNT2,AXIN2,HEYL,RGCC,TMEM100,GLIPR2
14_Member	GO Biological Processes	GO:0003197	endocardial cushion development	-4.73201	-2.71004	8/47	94,653,2022,6092,6910,7048,26508,55273	ACVRL1,BMP5,ENG,ROBO2,TBX5,TGFBR2,HEYL,TMEM100
14_Member	GO Biological Processes	GO:0060317	cardiac epithelial to mesenchymal transition	-4.59942	-2.613	7/36	94,2022,3037,7048,7472,26508,55273	ACVRL1,ENG,HAS2,TGFBR2,WNT2,HEYL,TMEM100
14_Member	GO Biological Processes	GO:0003203	endocardial cushion morphogenesis	-4.43861	-2.50566	7/38	94,653,2022,6092,7048,26508,55273	ACVRL1,BMP5,ENG,ROBO2,TGFBR2,HEYL,TMEM100
14_Member	GO Biological Processes	GO:0003272	endocardial cushion formation	-4.362	-2.45508	6/27	653,2022,6092,7048,26508,55273	BMP5,ENG,ROBO2,TGFBR2,HEYL,TMEM100
14_Member	GO Biological Processes	GO:0072132	mesenchyme morphogenesis	-4.21985	-2.3489	8/55	94,653,2022,6092,7048,26508,55273,89780	ACVRL1,BMP5,ENG,ROBO2,TGFBR2,HEYL,TMEM100,WNT3A
14_Member	GO Biological Processes	GO:0003151	outflow tract morphogenesis	-3.74348	-1.96777	9/81	2022,2348,4091,5914,6092,7048,7122,26508,54345	ENG,FOLR1,SMAD6,RARA,ROBO2,TGFBR2,CLDN5,HEYL,SOX18
14_Member	GO Biological Processes	GO:0003148	outflow tract septum morphogenesis	-3.24503	-1.57547	5/28	2022,4091,5914,6092,7048	ENG,SMAD6,RARA,ROBO2,TGFBR2
14_Member	GO Biological Processes	GO:0003198	epithelial to mesenchymal transition involved in endocardial cushion formation	-2.87643	-1.29733	4/20	2022,7048,26508,55273	ENG,TGFBR2,HEYL,TMEM100
14_Member	GO Biological Processes	GO:0001569	branching involved in blood vessel morphogenesis	-2.73212	-1.18864	5/36	1906,2022,4855,7048,9723	EDN1,ENG,NOTCH4,TGFBR2,SEMA3E
14_Member	GO Biological Processes	GO:0035904	aorta development	-2.43422	-0.960706	6/60	94,2022,4091,4628,6092,56999	ACVRL1,ENG,SMAD6,MYH10,ROBO2,ADAMTS9
14_Member	GO Biological Processes	GO:0060840	artery development	-2.40547	-0.937161	8/102	94,2022,2348,4091,4628,6092,56999,221395	ACVRL1,ENG,FOLR1,SMAD6,MYH10,ROBO2,ADAMTS9,ADGRF5
14_Member	GO Biological Processes	GO:0010718	positive regulation of epithelial to mesenchymal transition	-2.10562	-0.717455	5/50	2022,7048,8313,28984,152007	ENG,TGFBR2,AXIN2,RGCC,GLIPR2
15_Summary	Canonical Pathways	M5880	NABA ECM AFFILIATED	-8.76775	-6.00128	21/170	306,2262,6439,6440,6441,7123,7869,8547,9037,9723,51267,51705,56920,81035,114898,142683,161198,253970,389376,653509,729238	ANXA3,GPC5,SFTPB,SFTPC,SFTPD,CLEC3B,SEMA3B,FCN3,SEMA5A,SEMA3E,CLEC1A,EMCN,SEMA3G,COLEC12,C1QTNF2,ITLN2,CLEC14A,SFTA3,SFTA2,SFTPA1,SFTPA2
15_Member	Canonical Pathways	M5880	NABA ECM AFFILIATED	-8.76775	-6.00128	21/170	306,2262,6439,6440,6441,7123,7869,8547,9037,9723,51267,51705,56920,81035,114898,142683,161198,253970,389376,653509,729238	ANXA3,GPC5,SFTPB,SFTPC,SFTPD,CLEC3B,SEMA3B,FCN3,SEMA5A,SEMA3E,CLEC1A,EMCN,SEMA3G,COLEC12,C1QTNF2,ITLN2,CLEC14A,SFTA3,SFTA2,SFTPA1,SFTPA2

## Sheet: Supplemental Table 9
Supplemental Table 9. Enriched child GO terms of the immune System process pathway by Metascape with genes in MEblue module.
Category	CategoryID	GO	Description	PARENT_GO	LogP	Enrichment	Z-score	#TotalGeneInLibrary	#GeneInGO	#GeneInHitList	#GeneInGOAndHitList	%InGO	STDV %InGO	GeneID	Hits	Log(q-value)
GO Biological Processes	19	GO:0002274	myeloid leukocyte activation	19_GO:0002376 immune system process	-5.7	2.3	5.4	27994	664	695	38	5.5	0.86	1|12|177|240|306|566|948|976|1088|1604|1675|2352|2358|3459|4973|5175|5787|5806|6515|6556|7048|8692|8778|9173|10326|11027|11326|22918|56729|84106|84658|90865|120892|126014|199675|221395|353189|401258	A1BG|SERPINA3|AGER|ALOX5|ANXA3|AZU1|CD36|ADGRE5|CEACAM8|CD55|CFD|FOLR3|FPR2|IFNGR1|OLR1|PECAM1|PTPRB|PTX3|SLC2A3|SLC11A1|TGFBR2|HYAL2|SIGLEC5|IL1RL1|SIRPB1|LILRA2|VSIG4|CD93|RETN|PRAM1|ADGRE3|IL33|LRRK2|OSCAR|MCEMP1|ADGRF5|SLCO4C1|RAB44	-3.5
GO Biological Processes	19	GO:0002446	neutrophil mediated immunity	19_GO:0002376 immune system process	-5	2.4	5.1	27994	502	695	30	4.3	0.77	1|12|240|306|566|948|976|1088|1604|1636|1675|2352|2358|4973|5175|5319|5787|5806|6515|6556|8778|10326|22918|56729|84106|84658|126014|199675|353189|401258	A1BG|SERPINA3|ALOX5|ANXA3|AZU1|CD36|ADGRE5|CEACAM8|CD55|ACE|CFD|FOLR3|FPR2|OLR1|PECAM1|PLA2G1B|PTPRB|PTX3|SLC2A3|SLC11A1|SIGLEC5|SIRPB1|CD93|RETN|PRAM1|ADGRE3|OSCAR|MCEMP1|SLCO4C1|RAB44	-2.9
GO Biological Processes	19	GO:0002263	cell activation involved in immune response	19_GO:0002376 immune system process	-4.9	2.1	4.9	27994	722	695	38	5.5	0.86	1|12|240|306|566|948|976|1088|1604|1675|2352|2358|3383|4973|5175|5787|5806|5914|6515|6556|6693|8778|8809|9452|10326|11027|22918|56729|56892|84106|84658|84807|90865|117157|126014|199675|353189|401258	A1BG|SERPINA3|ALOX5|ANXA3|AZU1|CD36|ADGRE5|CEACAM8|CD55|CFD|FOLR3|FPR2|ICAM1|OLR1|PECAM1|PTPRB|PTX3|RARA|SLC2A3|SLC11A1|SPN|SIGLEC5|IL18R1|ITM2A|SIRPB1|LILRA2|CD93|RETN|TCIM|PRAM1|ADGRE3|NFKBID|IL33|SH2D1B|OSCAR|MCEMP1|SLCO4C1|RAB44	-2.8
GO Biological Processes	19	GO:0002283	neutrophil activation involved in immune response	19_GO:0002376 immune system process	-4.7	2.4	4.9	27994	491	695	29	4.2	0.76	1|12|240|306|566|948|976|1088|1604|1675|2352|2358|4973|5175|5787|5806|6515|6556|8778|10326|11027|22918|56729|84106|84658|126014|199675|353189|401258	A1BG|SERPINA3|ALOX5|ANXA3|AZU1|CD36|ADGRE5|CEACAM8|CD55|CFD|FOLR3|FPR2|OLR1|PECAM1|PTPRB|PTX3|SLC2A3|SLC11A1|SIGLEC5|SIRPB1|LILRA2|CD93|RETN|PRAM1|ADGRE3|OSCAR|MCEMP1|SLCO4C1|RAB44	-2.7
GO Biological Processes	19	GO:0002366	leukocyte activation involved in immune response	19_GO:0002376 immune system process	-4.6	2.1	4.7	27994	718	695	37	5.3	0.85	1|12|240|306|566|948|976|1088|1604|1675|2352|2358|3383|4973|5175|5787|5806|5914|6515|6556|6693|8778|8809|9452|10326|11027|22918|56729|84106|84658|84807|90865|117157|126014|199675|353189|401258	A1BG|SERPINA3|ALOX5|ANXA3|AZU1|CD36|ADGRE5|CEACAM8|CD55|CFD|FOLR3|FPR2|ICAM1|OLR1|PECAM1|PTPRB|PTX3|RARA|SLC2A3|SLC11A1|SPN|SIGLEC5|IL18R1|ITM2A|SIRPB1|LILRA2|CD93|RETN|PRAM1|ADGRE3|NFKBID|IL33|SH2D1B|OSCAR|MCEMP1|SLCO4C1|RAB44	-2.6
GO Biological Processes	19	GO:0042119	neutrophil activation	19_GO:0002376 immune system process	-4.6	2.3	4.8	27994	503	695	29	4.2	0.76	1|12|240|306|566|948|976|1088|1604|1675|2352|2358|4973|5175|5787|5806|6515|6556|8778|10326|11027|22918|56729|84106|84658|126014|199675|353189|401258	A1BG|SERPINA3|ALOX5|ANXA3|AZU1|CD36|ADGRE5|CEACAM8|CD55|CFD|FOLR3|FPR2|OLR1|PECAM1|PTPRB|PTX3|SLC2A3|SLC11A1|SIGLEC5|SIRPB1|LILRA2|CD93|RETN|PRAM1|ADGRE3|OSCAR|MCEMP1|SLCO4C1|RAB44	-2.6
GO Biological Processes	19	GO:0036230	granulocyte activation	19_GO:0002376 immune system process	-4.5	2.3	4.7	27994	509	695	29	4.2	0.76	1|12|240|306|566|948|976|1088|1604|1675|2352|2358|4973|5175|5787|5806|6515|6556|8778|10326|11027|22918|56729|84106|84658|126014|199675|353189|401258	A1BG|SERPINA3|ALOX5|ANXA3|AZU1|CD36|ADGRE5|CEACAM8|CD55|CFD|FOLR3|FPR2|OLR1|PECAM1|PTPRB|PTX3|SLC2A3|SLC11A1|SIGLEC5|SIRPB1|LILRA2|CD93|RETN|PRAM1|ADGRE3|OSCAR|MCEMP1|SLCO4C1|RAB44	-2.5
GO Biological Processes	19	GO:0043312	neutrophil degranulation	19_GO:0002376 immune system process	-4.4	2.3	4.7	27994	488	695	28	4	0.75	1|12|240|306|566|948|976|1088|1604|1675|2352|2358|4973|5175|5787|5806|6515|6556|8778|10326|22918|56729|84106|84658|126014|199675|353189|401258	A1BG|SERPINA3|ALOX5|ANXA3|AZU1|CD36|ADGRE5|CEACAM8|CD55|CFD|FOLR3|FPR2|OLR1|PECAM1|PTPRB|PTX3|SLC2A3|SLC11A1|SIGLEC5|SIRPB1|CD93|RETN|PRAM1|ADGRE3|OSCAR|MCEMP1|SLCO4C1|RAB44	-2.5
GO Biological Processes	19	GO:0042116	macrophage activation	19_GO:0002376 immune system process	-4.4	4.4	5.4	27994	101	695	11	1.6	0.47	177|566|2358|3459|6556|9173|11326|22918|90865|120892|221395	AGER|AZU1|FPR2|IFNGR1|SLC11A1|IL1RL1|VSIG4|CD93|IL33|LRRK2|ADGRF5	-2.5
GO Biological Processes	19	GO:0002275	myeloid cell activation involved in immune response	19_GO:0002376 immune system process	-4.2	2.2	4.5	27994	551	695	30	4.3	0.77	1|12|240|306|566|948|976|1088|1604|1675|2352|2358|4973|5175|5787|5806|6515|6556|8778|10326|11027|22918|56729|84106|84658|90865|126014|199675|353189|401258	A1BG|SERPINA3|ALOX5|ANXA3|AZU1|CD36|ADGRE5|CEACAM8|CD55|CFD|FOLR3|FPR2|OLR1|PECAM1|PTPRB|PTX3|SLC2A3|SLC11A1|SIGLEC5|SIRPB1|LILRA2|CD93|RETN|PRAM1|ADGRE3|IL33|OSCAR|MCEMP1|SLCO4C1|RAB44	-2.4
GO Biological Processes	19	GO:0002444	myeloid leukocyte mediated immunity	19_GO:0002376 immune system process	-4.1	2.2	4.4	27994	557	695	30	4.3	0.77	1|12|240|306|566|948|976|1088|1604|1636|1675|2352|2358|4973|5175|5319|5787|5806|6515|6556|8778|10326|22918|56729|84106|84658|126014|199675|353189|401258	A1BG|SERPINA3|ALOX5|ANXA3|AZU1|CD36|ADGRE5|CEACAM8|CD55|ACE|CFD|FOLR3|FPR2|OLR1|PECAM1|PLA2G1B|PTPRB|PTX3|SLC2A3|SLC11A1|SIGLEC5|SIRPB1|CD93|RETN|PRAM1|ADGRE3|OSCAR|MCEMP1|SLCO4C1|RAB44	-2.3
GO Biological Processes	19	GO:0043299	leukocyte degranulation	19_GO:0002376 immune system process	-3.7	2.1	4.1	27994	539	695	28	4	0.75	1|12|240|306|566|948|976|1088|1604|1675|2352|2358|4973|5175|5787|5806|6515|6556|8778|10326|22918|56729|84106|84658|126014|199675|353189|401258	A1BG|SERPINA3|ALOX5|ANXA3|AZU1|CD36|ADGRE5|CEACAM8|CD55|CFD|FOLR3|FPR2|OLR1|PECAM1|PTPRB|PTX3|SLC2A3|SLC11A1|SIGLEC5|SIRPB1|CD93|RETN|PRAM1|ADGRE3|OSCAR|MCEMP1|SLCO4C1|RAB44	-1.9
GO Biological Processes	19	GO:0045916	negative regulation of complement activation	19_GO:0002376 immune system process	-2.9	13	5.9	27994	9	695	3	0.43	0.25	2|1604|11326	A2M|CD55|VSIG4	-1.3
GO Biological Processes	19	GO:0001774	microglial cell activation	19_GO:0002376 immune system process	-2.8	4.8	4.3	27994	50	695	6	0.86	0.35	177|566|2358|3459|90865|120892	AGER|AZU1|FPR2|IFNGR1|IL33|LRRK2	-1.3
GO Biological Processes	19	GO:0002269	leukocyte activation involved in inflammatory response	19_GO:0002376 immune system process	-2.8	4.8	4.3	27994	50	695	6	0.86	0.35	177|566|2358|3459|90865|120892	AGER|AZU1|FPR2|IFNGR1|IL33|LRRK2	-1.3
GO Biological Processes	19	GO:0002683	negative regulation of immune system process	19_GO:0002376 immune system process	-2.8	2	3.4	27994	492	695	24	3.5	0.69	2|653|1604|2615|4792|5196|5468|5914|6441|6693|6886|7704|9173|9353|10272|11027|11213|11326|27202|55824|79148|84807|90865|221395	A2M|BMP5|CD55|LRRC32|NFKBIA|PF4|PPARG|RARA|SFTPD|SPN|TAL1|ZBTB16|IL1RL1|SLIT2|FSTL3|LILRA2|IRAK3|VSIG4|C5AR2|PAG1|MMP28|NFKBID|IL33|ADGRF5	-1.3
GO Biological Processes	19	GO:0001867	complement activation, lectin pathway	19_GO:0002376 immune system process	-2.5	10	5	27994	12	695	3	0.43	0.25	2|4239|8547	A2M|MFAP4|FCN3	-1
GO Biological Processes	19	GO:0035710	CD4-positive, alpha-beta T cell activation	19_GO:0002376 immune system process	-2.5	3.3	3.7	27994	97	695	8	1.2	0.4	177|1604|5914|6693|7048|8809|9308|84807	AGER|CD55|RARA|SPN|TGFBR2|IL18R1|CD83|NFKBID	-1
GO Biological Processes	19	GO:0006959	humoral immune response	19_GO:0002376 immune system process	-2.5	2	3.2	27994	379	695	19	2.7	0.62	2|240|566|730|1604|1675|2920|2921|4239|5196|5319|6441|6556|8547|9308|11326|27202|28984|54210	A2M|ALOX5|AZU1|C7|CD55|CFD|CXCL2|CXCL3|MFAP4|PF4|PLA2G1B|SFTPD|SLC11A1|FCN3|CD83|VSIG4|C5AR2|RGCC|TREM1	-1
GO Biological Processes	19	GO:0002921	negative regulation of humoral immune response	19_GO:0002376 immune system process	-2.4	9.3	4.8	27994	13	695	3	0.43	0.25	2|1604|11326	A2M|CD55|VSIG4	-0.96
GO Biological Processes	19	GO:0008228	opsonization	19_GO:0002376 immune system process	-2.4	9.3	4.8	27994	13	695	3	0.43	0.25	5322|5806|653509	PLA2G5|PTX3|SFTPA1	-0.96
GO Biological Processes	19	GO:0002825	regulation of T-helper 1 type immune response	19_GO:0002376 immune system process	-2.4	6	4.1	27994	27	695	4	0.58	0.29	6556|8809|9173|90865	SLC11A1|IL18R1|IL1RL1|IL33	-0.92
GO Biological Processes	19	GO:0042088	T-helper 1 type immune response	19_GO:0002376 immune system process	-2.3	4.6	3.8	27994	44	695	5	0.72	0.32	6556|6693|8809|9173|90865	SLC11A1|SPN|IL18R1|IL1RL1|IL33	-0.89
GO Biological Processes	19	GO:2000514	regulation of CD4-positive, alpha-beta T cell activation	19_GO:0002376 immune system process	-2.3	3.8	3.6	27994	63	695	6	0.86	0.35	177|1604|5914|7048|9308|84807	AGER|CD55|RARA|TGFBR2|CD83|NFKBID	-0.88
GO Biological Processes	19	GO:0002456	T cell mediated immunity	19_GO:0002376 immune system process	-2.3	3	3.4	27994	106	695	8	1.2	0.4	177|1604|2013|3383|6556|8809|23180|23705	AGER|CD55|EMP2|ICAM1|SLC11A1|IL18R1|RFTN1|CADM1	-0.86
GO Biological Processes	19	GO:0002224	toll-like receptor signaling pathway	19_GO:0002376 immune system process	-2.3	2.6	3.2	27994	155	695	10	1.4	0.45	857|948|4792|6441|11027|11213|23180|81035|653509|729238	CAV1|CD36|NFKBIA|SFTPD|LILRA2|IRAK3|RFTN1|COLEC12|SFTPA1|SFTPA2	-0.83
GO Biological Processes	19	GO:0045088	regulation of innate immune response	19_GO:0002376 immune system process	-2.2	1.8	2.9	27994	459	695	21	3	0.65	2|857|948|2358|3384|3459|4792|5322|5468|6441|9437|11027|11213|11326|23180|23705|57864|81035|117157|653509|729238	A2M|CAV1|CD36|FPR2|ICAM2|IFNGR1|NFKBIA|PLA2G5|PPARG|SFTPD|NCR1|LILRA2|IRAK3|VSIG4|RFTN1|CADM1|SLC46A2|COLEC12|SH2D1B|SFTPA1|SFTPA2	-0.82
GO Biological Processes	19	GO:0006957	complement activation, alternative pathway	19_GO:0002376 immune system process	-2.1	7.1	4	27994	17	695	3	0.43	0.25	730|1675|11326	C7|CFD|VSIG4	-0.71

## Sheet: Supplemental Table 10
Supplemental Table 10. Information of the 22 Exome-seq data.
Sample_name	cancer type	tumor	Exon Coverage	Base Depth	Exon NO	Base NO
2N	ESCC	normal	0.91	22.894	263783	2260952595
2T	ESCC	tumor	0.902	19.303	261676	1906373432
X0601N	ESCC	normal	0.913	25.032	264630	2472171332
X0601T	ESCC	tumor	0.913	25.825	264770	2550478377
G0164N	HCC	normal	0.9	22.672	260978	2239044578
G0164T	HCC	tumor	0.897	22.342	259974	2206456829
G0218N	HCC	normal	0.889	17.523	257685	1730540870
G0218T	HCC	tumor	0.907	27.804	263028	2745886115
G0224N	HCC	normal	0.886	15.606	256858	1541238707
G0224T	HCC	tumor	0.906	27.276	262734	2693736133
G0228N	HCC	normal	0.896	22.187	259753	2191165726
G0228T	HCC	tumor	0.895	21.149	259562	2088655954
G0267N	HCC	normal	0.883	14.57	255968	1438888271
G0267T	HCC	tumor	0.899	22.731	260591	2244940396
3N	LUAD	normal	0.9	22.36	261032	2208219278
3T	LUAD	tumor	0.902	23.456	261480	2316539168
X0742N	LUAD	normal	0.901	23.757	261287	2346183180
X0742T	LUAD	tumor	0.896	21.214	259688	2095080182
X0803N	LUAD	normal	0.883	16.225	255982	1602337436
X0803T	LUAD	tumor	0.896	21.831	259791	2155994975
W0158N	SRCC	normal	0.887	21.573	257218	2130527569
W0158T	SRCC	tumor	0.876	15.684	254005	1548925746
W0207N	SRCC	normal	0.889	21.888	257803	2161603408
W0207T	SRCC	tumor	0.892	23.415	258747	2312401232

[truncated: 1 more sheets: Supplemental Table 11]
